# Supplementary material for: Photocatalyzed de novo synthesis of fused tetracyclic skeletons via stepwise formal [3 + 2]/[4 or 5 + 2] cycloadditions
Source: Royal Society of Chemistry journal article supplement (doi:10.1039/d4qo01729c), 2024-01-01

## Photocatalyzed de novo synthesis of fused tetracyclic skeletons via stepwise formal [3+2]/[4 or 5+2] cycloadditions

Wenjing Guan,<sup>a</sup> Jinlin Hang,<sup>a</sup> Guanru Liu,<sup>a</sup> Yaqi Qiao,<sup>a</sup> Chengcheng Yuan,<sup>a</sup> Lufang Liao,<sup>a</sup> Xiaoqing Fan,<sup>a</sup> Zheng Fang,<sup>a</sup> Chengkou Liu\*<sup>a</sup> and Kai Guo<sup>a,b</sup>

<sup>a</sup>College of Biotechnology and Pharmaceutical Engineering, Nanjing Tech University, Nanjing, 211816 China. E-mail: liuchengkou@njtech.edu.cn

<sup>b</sup>State Key Laboratory of Materials-Oriented Chemical Engineering, Nanjing Tech University, Nanjing, 211816 China.

### Table of Contents

|   | Contents                                                                                    | Page    |
|---|---------------------------------------------------------------------------------------------|---------|
| 1 | General Information                                                                         | S2      |
| 2 | Reaction Device                                                                             | S2      |
| 3 | General Procedure for the Synthesis of Products 3a-3b                                       | S3-S5   |
| 4 | Mechanistic Studies                                                                         | S5-S13  |
| 5 | X-ray Crystallography Studies of Product <b>12</b>                                          | S13-S14 |
| 6 | Synthesis of Substrates                                                                     | S15-S17 |
| 7 | Characterization Data for Photocatalysis Products                                           | S17-S33 |
| 8 | References                                                                                  | S34-S35 |
| 9 | NMR Spectra for Photocatalysis Products and <b>32</b> , <b>33'</b> , <b>28'</b> , <b>3'</b> | S36-S72 |

## 1、 General Information

Unless otherwise indicated, all the reagents and solvents were purchased from commercial suppliers and used without any further purification.  $^1\text{H}$  spectra were recorded in  $\text{CDCl}_3$  or (Methyl sulfoxide)- $d_6$  on 400MHz NMR spectrometers and resonances ( $\bullet$ ) are given in parts per million relatives to tetramethylsilane. Data are reported as follows: chemical shift, multiplicity (s = singlet, d = doublet, t = triplet, q = quartet, p = penta, dd = doublet of doublets, dt = doublet of triplets, m = multiplet), coupling constant (J) in Hertz (Hz), and integration.  $^{13}\text{C}$  NMR were recorded at 100 MHz and chemical data for carbons are reported in parts per million (ppm,  $\delta$  scale) downfield from tetramethylsilane and are referenced to the carbon resonance of the solvent. Column chromatography was generally performed on Silicycle silica gel (200-300 mesh). Analytical thin-layer chromatography (TLC) was performed on 0.2 mm coated silica gel plates (HSGF 254) and visualized the course of the reactions using a UV light (254 nm or 365 nm). High-resolution mass spectra (HRMS) were obtained on an Agilent mass spectrometer using ESI-TOF (electrosprayionization-time of flight)

## 2、 Reaction Device

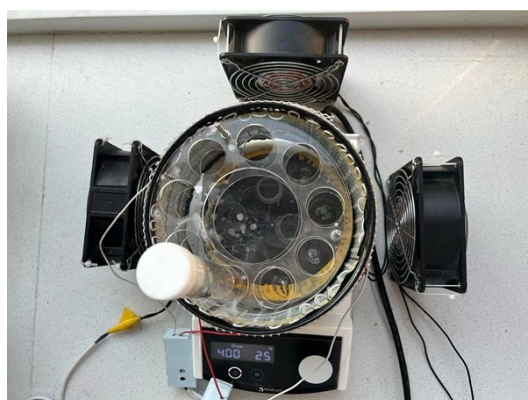

**Figure S1** Picture of DIY photocatalysis setup

The DIY photocatalysis setup used is shown in Fig. S1.

### 3、General Procedure for the Synthesis of Products 3a-3b

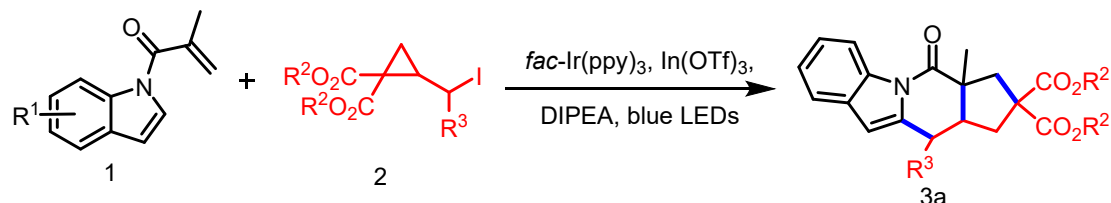

A 35 mL glass tube was charged with **1** (0.3 mmol), **2** (0.6 mmol, 2 eq),  $fac\text{-Ir(ppy)}_3$  (2 mmol %),  $\text{In(OTf)}_3$  (0.75 mmol, 2.5 eq), DIPEA (0.3 mmol, 1 eq), DMSO/ $\text{H}_2\text{O}$  (3 mL, v/v = 4/1) and a magnetic stir bar. The reaction mixture was stirred and irradiated by blue LED (420 - 430 nm, 40W) for 5-10 hours. After completing reaction, it was monitored with TLC. The reaction solution was diluted with ethyl acetate (50 mL) and washed with  $\text{H}_2\text{O}$  (50 mL). The separated organic layer was dried over anhydrous  $\text{Na}_2\text{SO}_4$  and filtered. The filtrate was concentrated under reduced pressure to give the crude product, which was purified by column chromatographic separation (ethyl acetate/petroleum ether) to obtain the desired product **3a**.

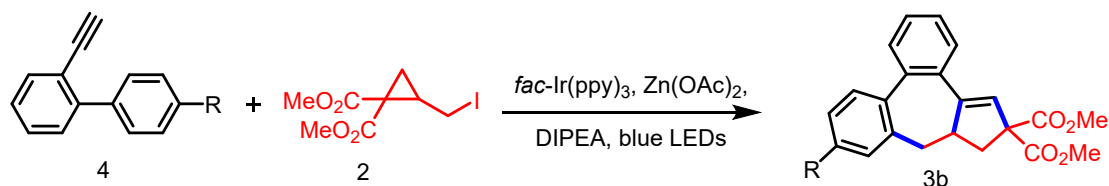

A 35 mL glass tube was charged with **4** (0.3 mmol), **2** (0.6 mmol, 2 eq),  $fac\text{-Ir(ppy)}_3$  (2 mmol %),  $\text{Zn(OAc)}_2$  (0.75 mmol, 2.5 eq), DIPEA (0.3 mmol, 1 eq), DMSO/ $\text{H}_2\text{O}$  (3 mL, v/v = 4/1) and a magnetic stir bar. The reaction mixture was stirred and irradiated by blue LED (420 - 430 nm, 40W) for 5-10 hours. After completing reaction, it was monitored with TLC. The reaction solution was diluted with ethyl acetate (50 mL) and washed with  $\text{H}_2\text{O}$  (50 mL). The separated organic layer was dried over anhydrous  $\text{Na}_2\text{SO}_4$  and filtered. The filtrate was concentrated under reduced pressure to give the crude product, which was purified by column chromatographic separation (ethyl acetate/petroleum ether) to obtain the desired product **3b**.

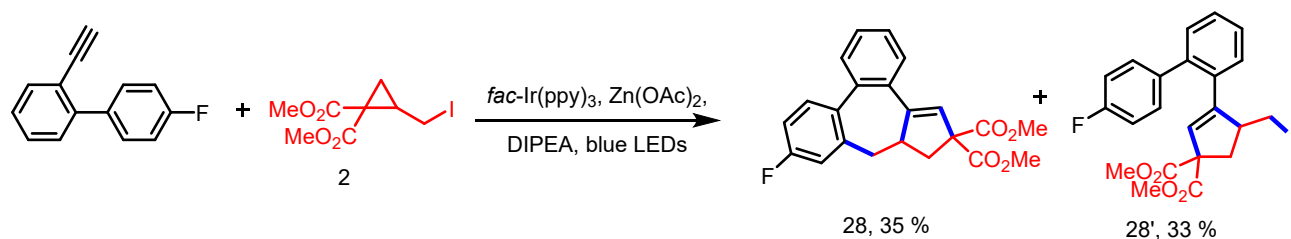

A 35 mL glass tube was charged with 2-ethynyl-4'-fluoro-1,1'-biphenyl (0.3 mmol), **2** (0.6 mmol, 2 eq), *fac*-Ir(ppy)<sub>3</sub> (2 mmol %), Zn(OAc)<sub>2</sub> (0.75 mmol, 2.5 eq), DIPEA (0.3 mmol, 1 eq), DMSO/H<sub>2</sub>O (3 mL, v/v = 4/1) and a magnetic stir bar. The reaction mixture was stirred and irradiated by blue LED (420 - 430 nm, 40W) 10 hours. After completing reaction, it was monitored with TLC. The reaction solution was diluted with ethyl acetate (50 mL) and washed with H<sub>2</sub>O (50 mL). The separated organic layer was dried over anhydrous Na<sub>2</sub>SO<sub>4</sub> and filtered. The filtrate was concentrated under reduced pressure to give the crude product, which was purified by column chromatographic separation (ethyl acetate/petroleum ether) to obtain the product **28** and **28'**.

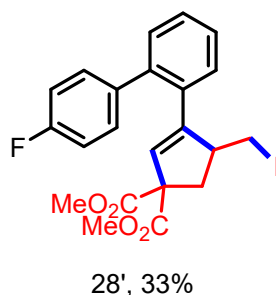

dimethyl-3-(4'-fluoro-[1,1'-biphenyl]-2-yl)-4-(iodomethyl)cyclopent-2-ene-1,1-dicarb-oxylate (**28'**):

White oil; Eluent: petroleum ether/ethyl acetate 30:1, 48.9 mg, 33 %;

<sup>1</sup>H NMR (400 MHz, Chloroform-*d*) δ 7.38 - 7.22 (m, 6H), 7.07 - 6.99 (m, 2H), 5.90 (d, *J* = 1.9 Hz, 1H), 3.73 (s, 3H), 3.71 (s, 3H), 2.94 (dd, *J* = 9.7, 3.1 Hz, 1H), 2.74 (dd, *J* = 9.7, 8.1 Hz, 1H), 2.69 - 2.62 (m, 1H), 2.58 (dd, *J* = 13.6, 7.9 Hz, 1H), 2.22 (dd, *J* = 13.6, 5.9 Hz, 1H); <sup>13</sup>C NMR (101 MHz, Chloroform-*d*) δ 171.02, 163.59, 161.14, 150.49, 139.22, 137.15 (d, *J* = 4.04), 133.64, 130.79, 130.71, 130.64, 130.21, 129.24, 128.56, 127.67, 115.48, 115.27, 64.74, 52.98, 52.97, 47.52, 38.92, 11.45; <sup>19</sup>F NMR (376 MHz, CDCl<sub>3</sub>) δ -114.89; HRMS (ESI-TOF) Calcd for Chemical Formula:

C<sub>22</sub>H<sub>21</sub>FIO<sub>4</sub> [M+H]<sup>+</sup>: 495.0463; found: 495.0461.

## 4、Mechanistic Studies

### 4-1、Direct Excitation Experiments:

#### 4-1-1 Without *fac*-Ir(ppy)<sub>3</sub>

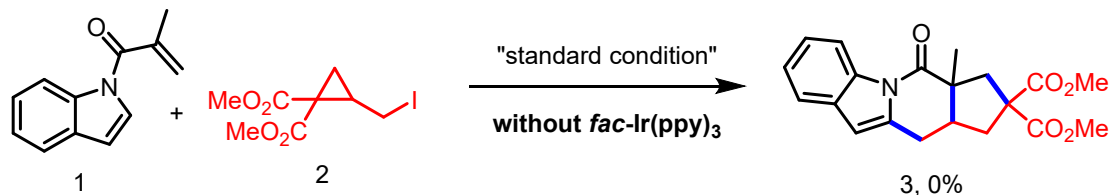

A 35 mL glass tube was charged with **1** (0.3 mmol), **2** (0.6 mmol, 2 eq), In(OTf)<sub>3</sub> (0.75 mmol, 2.5 eq), DIPEA (0.3 mmol, 1 eq), DMSO/H<sub>2</sub>O (3 mL, v/v = 4/1) and a magnetic stir bar. The reaction mixture was stirred and irradiated by blue LED (420 - 430 nm, 40W) for 5 hours. No desired product was detected.

#### 4-1-2、Dark

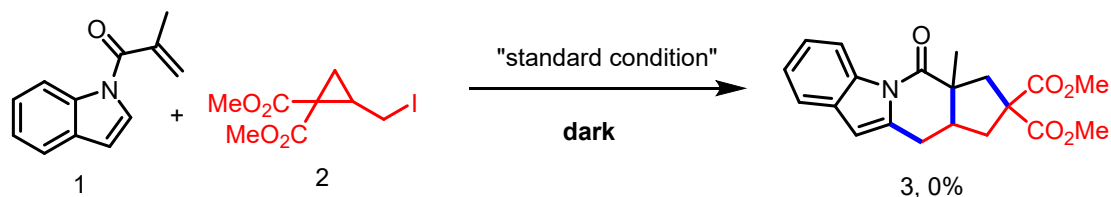

A 35 mL glass tube was charged with **1** (0.3 mmol), **2** (0.6 mmol, 2 eq), *fac*-Ir(ppy)<sub>3</sub> (2 mmol %), In(OTf)<sub>3</sub> (0.75 mmol, 2.5 eq), DIPEA (0.3 mmol, 1 eq), DMSO/H<sub>2</sub>O (3 mL, v/v = 4/1) and a magnetic stir bar. The reaction mixture was stirred in the dark for 5 hours. No desired product was detected.

### 4-2、Light on/off experiments:

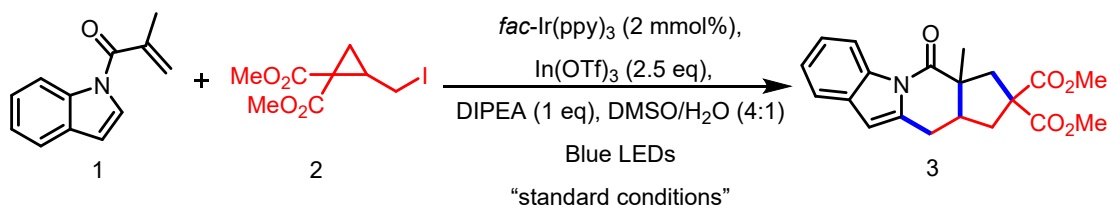

A 35 mL glass tube was charged with **1** (0.3 mmol), **2** (0.6 mmol, 2 eq), *fac*-Ir(ppy)<sub>3</sub> (2 mmol %), In(OTf)<sub>3</sub> (0.75 mmol, 2.5 eq), DIPEA (0.3 mmol, 1 eq), DMSO/H<sub>2</sub>O (3 mL, v/v = 4/1) and a magnetic stir bar. The reaction was sequentially stirred under

blue LED (420 - 430 nm, 40W) and under the dark atmosphere. Every half hours an aliquot of 0.1 mL was removed via syringe and analyzed by  $^1\text{H}$  NMR. After a total of 5 h the determined yields were plotted against the reaction time.

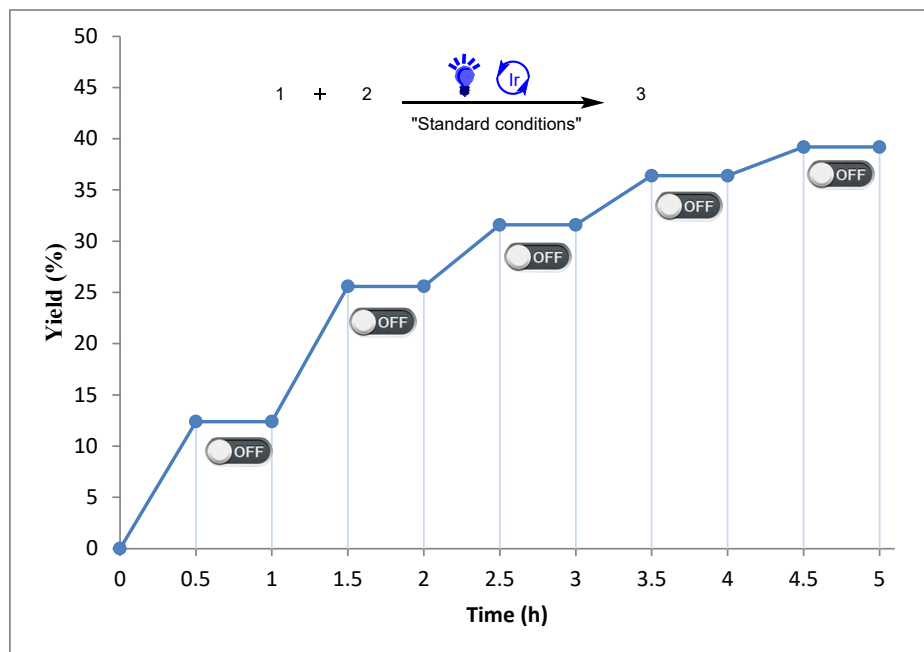

Figure S2. Light on/off experiments.

### 4-3、Radical-trapping Experiments:

#### 4-3-1、2 eq TEMPO or BHT was Added

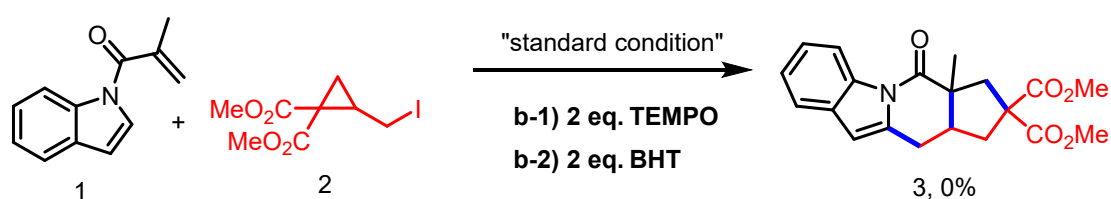

A 35 mL glass tube was charged with **1** (0.3 mmol), **2** (0.6 mmol, 2 eq), *fac*-Ir(ppy)<sub>3</sub> (2 mmol %), In(OTf)<sub>3</sub> (0.75 mmol, 2.5 eq), DIPEA (0.3 mmol, 1 eq), a radical scavenger TEMPO (0.6 mmol, 2 eq) or BHT (0.6 mmol, 2 eq), DMSO/H<sub>2</sub>O (3 mL, v/v = 4/1) and a magnetic stir bar. The reaction mixture was stirred and irradiated by blue LED (420 - 430 nm, 40W) for 5 hours. No desired products were detected.

#### 4-3-2、2 eq. 1,1-Diphenylethylene was Added

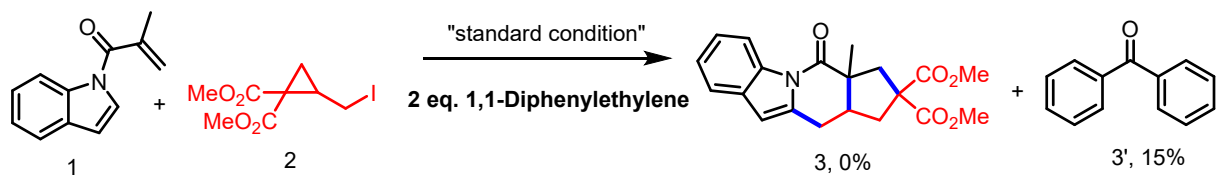

A 35 mL glass tube was charged with **1** (0.3 mmol), **2** (0.6 mmol, 2 eq), *fac*-Ir(ppy)<sub>3</sub> (2 mmol %), In(OTf)<sub>3</sub> (0.75 mmol, 2.5 eq), DIPEA (0.3 mmol, 1 eq), a radical scavenger 1,1-diphenylethylene (0.6 mmol, 2 eq), DMSO/H<sub>2</sub>O (3 mL, v/v = 4/1) and a magnetic stir bar. The reaction mixture was stirred and irradiated by blue LED (420 - 430 nm, 40W) for 16 hours. After completing reaction, it was monitored with TLC. The reaction solution was diluted with ethyl acetate (50 mL) and washed with H<sub>2</sub>O (50 mL). The separated organic layer was dried over anhydrous Na<sub>2</sub>SO<sub>4</sub> and filtered. The filtrate was concentrated under reduced pressure to give the crude product, which was purified by column chromatographic separation (ethyl acetate/petroleum ether) to obtain benzophenone **3'**.

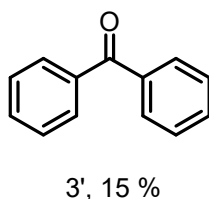

Benzophenone (**3'**):<sup>[1]</sup>

White solid; Eluent: petroleum ether/ethyl acetate 50:1, 16.4 mg, 15 %;

<sup>1</sup>H NMR (400 MHz, DMSO-*d*<sub>6</sub>) δ 7.77 - 7.72 (m, 4H), 7.71 - 7.66 (m, 2H), 7.60 - 7.54 (m, 4H); <sup>13</sup>C NMR (101 MHz, DMSO-*d*<sub>6</sub>) δ 195.85, 137.02, 132.72, 129.62, 128.60, 128.58.

#### 4-3-3、1-Ethynyl-4-methoxybenzene as Substrate

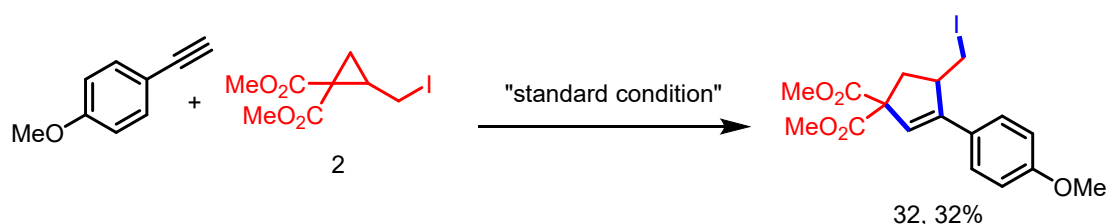

A 35 mL glass tube was charged with 1-ethynyl-4-methoxybenzene (0.3 mmol), **2**

(0.6 mmol, 2 eq), *fac*-Ir(ppy)<sub>3</sub> (2 mmol %), In(OTf)<sub>3</sub> (0.75 mmol, 2.5 eq), DIPEA (0.3 mmol, 1 eq), DMSO/H<sub>2</sub>O (3 mL, v/v = 4/1) and a magnetic stir bar. The reaction mixture was stirred and irradiated by blue LED (420 - 430 nm, 40W) for 5 hours. After completing reaction, it was monitored with TLC. The reaction solution was diluted with ethyl acetate (50 mL) and washed with H<sub>2</sub>O (50 mL). The separated organic layer was dried over anhydrous Na<sub>2</sub>SO<sub>4</sub> and filtered. The filtrate was concentrated under reduced pressure to give the crude product, which was purified by column chromatographic separation (ethyl acetate/petroleum ether) to obtain the desired product **32**.

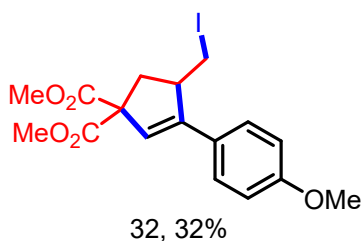

dimethyl 4-(iodomethyl)-3-(4-methoxyphenyl)cyclopent-2-ene-1,1-dicarboxylate (**32**):<sup>[2]</sup>

Pale yellow oil; Eluent: petroleum ether/ethyl acetate 25:1; 41.30 mg, 32 %;

<sup>1</sup>H NMR (400 MHz, Chloroform-*d*)  $\delta$  7.36 - 7.30 (m, 2H), 6.91 - 6.86 (m, 2H), 6.12 (d, *J* = 1.6 Hz, 1H), 3.82 (s, 3H), 3.79 (s, 3H), 3.74 (s, 3H), 3.67-3.58 (m, 1H), 3.41 (dd, *J* = 9.9, 2.8 Hz, 1H), 3.09 (t, *J* = 9.8 Hz, 1H), 2.89 (dd, *J* = 14.2, 8.5 Hz, 1H), 2.58 - 2.47 (m, 1H); <sup>13</sup>C NMR (101 MHz, Chloroform-*d*)  $\delta$  171.48, 171.46, 159.97, 148.41, 128.08, 126.43, 123.50, 114.29, 64.90, 55.46, 53.10, 53.07, 47.77, 38.62, 29.83, 11.59; HRMS (ESI-TOF) Calcd for Chemical Formula: C<sub>17</sub>H<sub>19</sub>IO<sub>5</sub>Na [M+Na]<sup>+</sup>: 453.0169; found: 453.0166.

#### 4-4、Radical Clock Experiments:

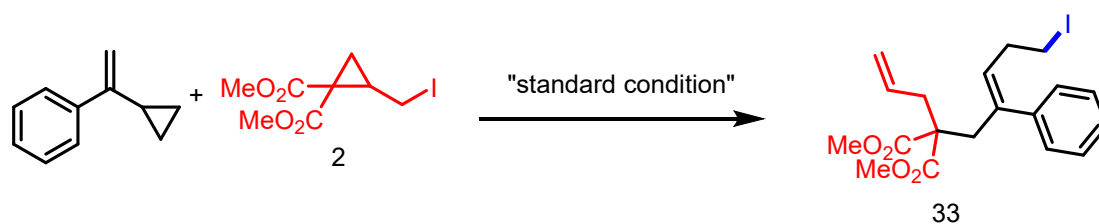

A 35 mL glass tube was charged with (1-cyclopropylvinyl)benzene (0.3 mmol), **2** (0.6 mmol, 2 eq), *fac*-Ir(ppy)<sub>3</sub> (2 mmol %), In(OTf)<sub>3</sub> (0.75 mmol, 2.5 eq), DIPEA (0.3 mmol, 1 eq), DMSO/H<sub>2</sub>O (3 mL, v/v = 4/1) and a magnetic stir bar. The reaction mixture was stirred and irradiated by blue LED (420 - 430 nm, 40W) for 12 hours. After completing reaction, it was monitored with TLC. **33** was detected by HRMS (ESI-TOF).

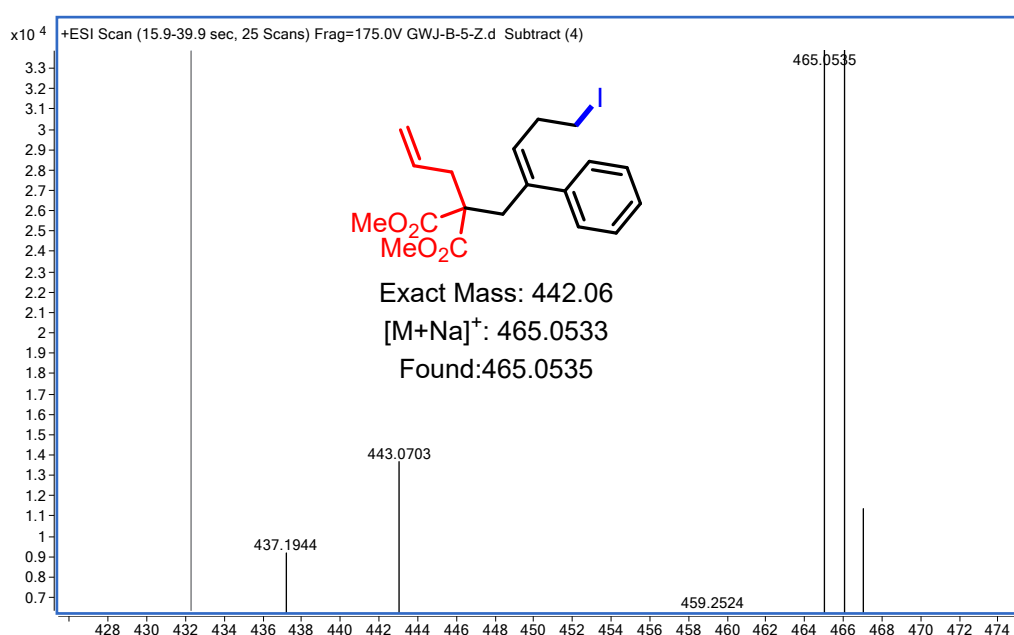

**Figure S3** HRMS (ESI) analysis of **33**

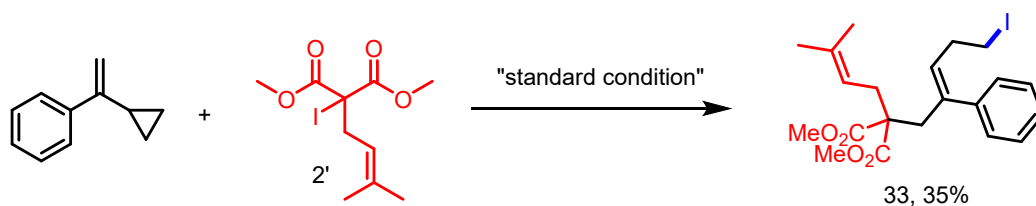

A 35 mL glass tube was charged with (1-cyclopropylvinyl)benzene (0.3 mmol), **2'** (0.6 mmol, 2 eq), *fac*-Ir(ppy)<sub>3</sub> (2 mmol %), In(OTf)<sub>3</sub> (0.75 mmol, 2.5 eq), DIPEA (0.3 mmol, 1 eq), DMSO/H<sub>2</sub>O (3 mL, v/v = 4/1) and a magnetic stir bar. The reaction mixture was stirred and irradiated by blue LED (420 - 430 nm, 40W) for 12 hours. After completing reaction, it was monitored with TLC. The reaction solution was diluted with ethyl acetate (50 mL) and washed with H<sub>2</sub>O (50 mL). The separated organic layer was dried over anhydrous Na<sub>2</sub>SO<sub>4</sub> and filtered. The filtrate was

concentrated under reduced pressure to give the crude product, which was purified by column chromatographic separation (ethyl acetate/petroleum ether) to obtain the desired product **33'**.

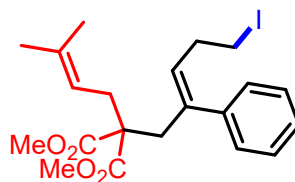

**33'**, 35%

dimethyl 2-(5-iodo-2-phenylpent-2-en-1-yl)-2-(3-methylbut-2-en-1-yl)malonate(**33'**):

Pale yellow oil; Eluent: petroleum ether/ethyl acetate 25:1; 49.39 mg, 35 %;

$^1\text{H}$  NMR (400 MHz, Chloroform-*d*)  $\delta$  7.35 - 7.21 (m, 4H, two isomers), 7.16 - 7.12 (m, 1H, two isomers), 5.53 (dt,  $J$  = 9.5, 7.2 Hz, 1H, two isomers), 4.94 (tdd,  $J$  = 7.1, 3.4, 1.5 Hz, 1H, two isomers), 3.42 (s, 3H, two isomers), 3.40 (s, 3H, two isomers), 3.23 (s, 1H, two isomers), 3.17 (t,  $J$  = 7.4 Hz, 1H, two isomers), 3.12 - 3.06 (m, 2H, two isomers), 2.78 (q,  $J$  = 7.3 Hz, 1H, two isomers), 2.60 - 2.44 (m, 3H, two isomers), 1.74 - 1.69 (m, 3H, two isomers), 1.55 (dd,  $J$  = 6.6, 1.4 Hz, 3H, two isomers);  $^{13}\text{C}$  NMR (101 MHz, Chloroform-*d*)  $\delta$  171.47 (one isomer), 171.35 (one isomer), 142.95 (one isomer), 139.12 (one isomer), 138.14 & 138.12 (two isomers), 135.73 & 135.46 (two isomers), 133.31 & 131.27 (two isomers), 128.92 (one isomer), 127.99 & 127.95 (two isomers), 127.34 (one isomer), 127.19 & 127.14 (two isomers), 117.87 & 117.72 (two isomers), 57.32 & 57.15 (two isomers), 52.15 & 52.08 (two isomers), 40.93 (one isomer), 33.07 (one isomer), 32.73 & 32.50 (two isomers), 30.83 & 30.49 (two isomers), 26.11 & 26.07 (two isomers), 18.08 & 18.05 (two isomers), 5.37 & 4.57 (two isomers); HRMS (ESI-TOF) Calcd for Chemical Formula:  $\text{C}_{21}\text{H}_{27}\text{IO}_4\text{Na}$   $[\text{M}+\text{Na}]^+$ : 493.0846; found: 493.0844.

#### 4-5、Procedures for the Electron Paramagnetic Resonance (EPR) Experiment

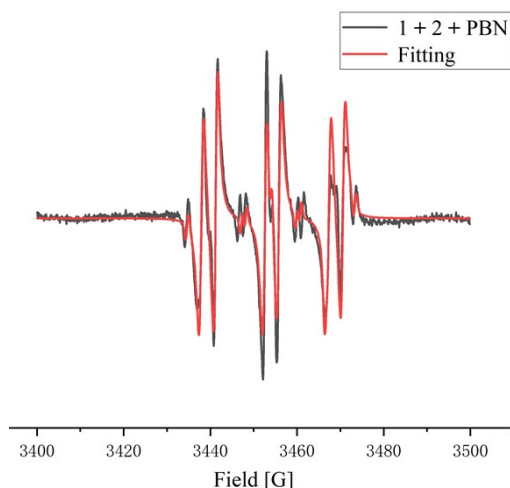

**Figure S4** Electron paramagnetic resonance (EPR) spectra.

A 35 mL glass tube was charged with **1** (0.3 mmol), **2** (0.6 mmol, 2 eq), *fac*-Ir(ppy)<sub>3</sub> (2 mmol %), In(OTf)<sub>3</sub> (0.75 mmol, 2.5 eq), DIPEA (0.3 mmol, 1 eq), DMSO/H<sub>2</sub>O (3 mL, v/v = 4/1) and a magnetic stir bar. The reaction mixture was stirred and irradiated by blue LED (420 - 430 nm, 40W). After 30 minutes, PBN (1 eq) was added to the reaction mixture and continued to react for 2 minutes. The solution sample was taken out into a small tube and analyzed by EPR.

Instrument Model : Germany Bruker EMX PLUS; CenterField: 3450.00 G; SweepWidth: 100.0 G; Power: 6.325 mW; PowerAtten: 15.0 dB; FrequencyMon: 9.824649 GHz; SweepTime: 30.00 s; ModAmp: 1.000 G; ModFreq: 100.00 kHz.

**Table S1** Free radical composition.

| Free radical species | gFactor | hyperfine splitting constants |                          | Quadratic integral area | relative content% |
|----------------------|---------|-------------------------------|--------------------------|-------------------------|-------------------|
|                      |         |                               |                          |                         |                   |
|                      |         | $A_N$                         | $A_{H\beta}$             |                         |                   |
| 1、PBN-R              | 2.03211 | 14.7137                       | 3.26398                  | 8.52772                 | 97.16%            |
| 2、PBN-H              | 2.03227 | 12.614                        | 6.74138(X <sub>2</sub> ) | 0.249353                | 2.84%             |

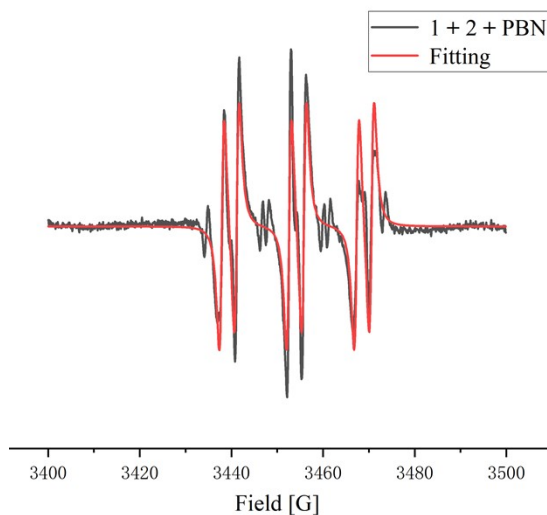

**Figure S5** Electron paramagnetic resonance spectra. (PBN-R)

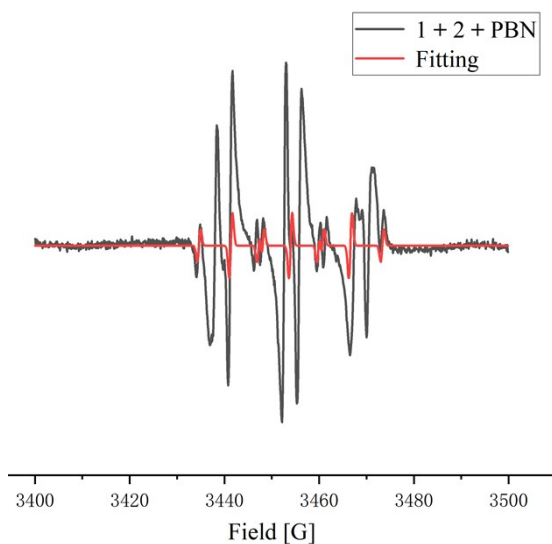

**Figure S6** Electron paramagnetic resonance spectra. (PBN-H)

#### 4-6、 Recovery rate of **2** in the presence/absence of Lewis acid

A 35 mL glass tube was charged with **1** (0.3 mmol), **2** (0.6 mmol, 2 eq), *fac*-Ir(ppy)<sub>3</sub> (2 mmol %), In(OTf)<sub>3</sub> (0.75 mmol, 2.5 eq), DIPEA (0.3 mmol, 1 eq), DMSO/H<sub>2</sub>O (3 mL, v/v = 4/1) and a magnetic stir bar. The reaction was stirred under blue LED (420 - 430 nm, 40W). Every half hours an aliquot of 0.1 mL was removed via syringe and analyzed by <sup>1</sup>H NMR (Table S2).

**Table S2** Recovery rate of 2 in the presence/absence of Lewis acid

| 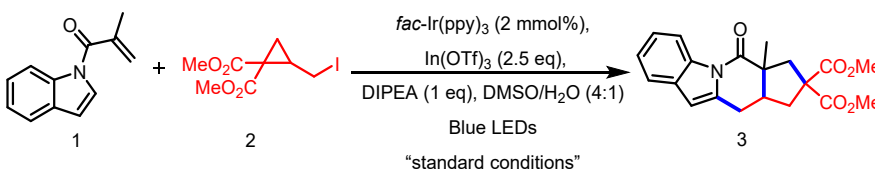 |                                     |                               |
|------------------------------------------------------------------------------------|-------------------------------------|-------------------------------|
| Time (h)                                                                           | Recovery rate of 2 (%) <sup>b</sup> |                               |
|                                                                                    | in the absence of Lewis acid        | in the presence of Lewis acid |
| 0.5                                                                                | 60                                  | 85.2                          |
| 1                                                                                  | 52.8                                | 79.2                          |
| 1.5                                                                                | 45.6                                | 68.8                          |

Reaction conditions: 1 (0.3 mmol, 55.6 mg), 2 (0.6 mmol, 178.8 mg), *fac*-Ir(ppy)<sub>3</sub> (2 mmol%, 3.9 mg), In(OTf)<sub>3</sub> (0.75 mmol, 421.5 mg), DIPEA (0.3 mmol, 38.8 mg), DMSO/H<sub>2</sub>O (4:1) (3 mL), blue light (40 W, LED, wavelength 420 nm-430 nm).

<sup>b</sup>Recovery rate of 2 were determined by <sup>1</sup>H NMR using dibromomethane as the internal standard.

## 5、X-ray Crystallography Studies of Product 12

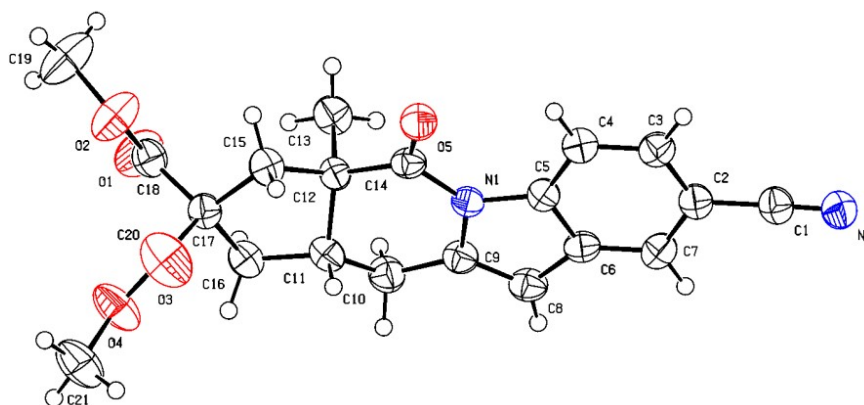

Single crystal suitable for X-ray diffraction was obtained by slow evaporation of a saturated solution of compound **12** (n-hexane/dichloromethane) in a loosely capped vial.

**Figure S7** Structure of **12** by X-Ray crystallographic (CCDC = 2312565 )

**Table S3** Crystal data and structure refinement for **12**

|                                                |                                                               |
|------------------------------------------------|---------------------------------------------------------------|
| Empirical formula                              | C <sub>21</sub> H <sub>20</sub> N <sub>2</sub> O <sub>5</sub> |
| Formula weight                                 | 380.39                                                        |
| Temperature/K                                  | 298.15                                                        |
| Crystal system                                 | monoclinic                                                    |
| Space group                                    | P2 <sub>1</sub> /c                                            |
| a/Å                                            | 20.762(3)                                                     |
| b/Å                                            | 6.4807(10)                                                    |
| c/Å                                            | 13.710(2)                                                     |
| $\alpha/^\circ$                                | 90                                                            |
| $\beta/^\circ$                                 | 94.323(8)                                                     |
| $\gamma/^\circ$                                | 90                                                            |
| Volume/Å <sup>3</sup>                          | 1839.6(5)                                                     |
| Z                                              | 4                                                             |
| $\rho_{\text{calc}}/\text{cm}^3$               | 1.373                                                         |
| $\mu/\text{mm}^{-1}$                           | 0.099                                                         |
| F(000)                                         | 800.0                                                         |
| Crystal size/mm <sup>3</sup>                   | 0.2 × 0.14 × 0.1                                              |
| Radiation                                      | MoK $\alpha$ ( $\lambda$ = 0.71073)                           |
| 2 $\Theta$ range for data collection/ $^\circ$ | 1.968 to 49.064                                               |
| Index ranges                                   | -23 ≤ h ≤ 24, -6 ≤ k ≤ 7, -16 ≤ l ≤ 14                        |
| Reflections collected                          | 16406                                                         |
| Independent reflections                        | 3042 [R <sub>int</sub> = 0.1154, R <sub>sigma</sub> = 0.0872] |
| Data/restraints/parameters                     | 3042/0/256                                                    |
| Largest diff. peak/hole / e Å <sup>-3</sup>    | 0.25/-0.32                                                    |

## 6、Synthesis of Substrates

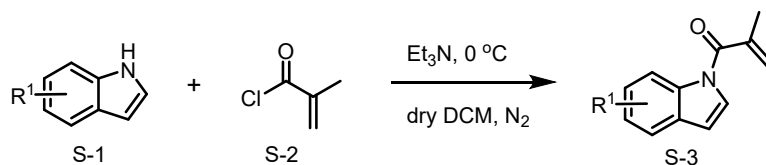

General procedure for the synthesis of substrate **S-3**:<sup>[3]</sup>

To a 100 mL round-bottom flask was added the solution of corresponding indole **S-1** (15.0 mmol) in DCM and triethylamine (30.0 mmol, 2.0 equiv). The mixture was stirred at 0 °C, and added methacryloyl chloride **S-2** (22.5 mmol, 1.5 equiv) slowly under N<sub>2</sub> atmosphere. The resulting solution was stirred at room temperature for 6-12 h, quenched with H<sub>2</sub>O (50 mL), extracted with DCM (50 mL × 3). The combined organic layer was washed with brine (50 mL × 3), dried over Na<sub>2</sub>SO<sub>4</sub>, and concentrated. The residue was purified by flash chromatography on a silica gel using petroleum ether and ethyl acetate (300:1~100:1, v/v) as the eluent to give corresponding indole substrates **S-3**.

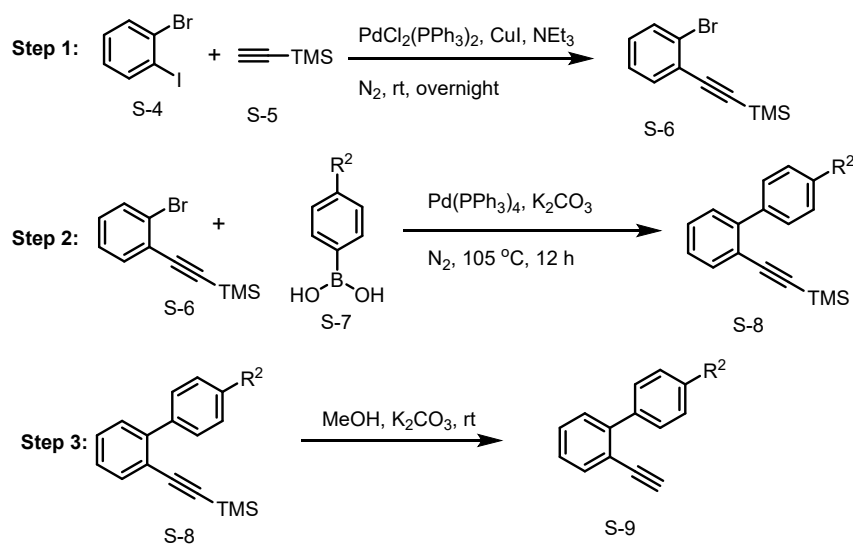

**Step 1:** General procedure for the synthesis of substrate **S-6**:<sup>[4]</sup>

To a solution of the 1-bromo-2-iodobenzene **S-4** (20 mmol, 1.0 equiv.) and ethynyltrimethylsilane **S-5** (22 mmol, 1.1 equiv.) in NEt<sub>3</sub> (40 mL), PdCl<sub>2</sub>(PPh<sub>3</sub>)<sub>2</sub> (0.5 mol%) and CuI (1 mol%) were added. The resulting mixture was then stirred at room temperature overnight under N<sub>2</sub> atmosphere. After completion of the reaction, an

aqueous saturated solution of ammonium chloride was added and the resulted solution was extracted with ethyl acetate for 2-3 times. The combined organic phases were dried over anhydrous Na<sub>2</sub>SO<sub>4</sub>, filtered and concentrated under reduced pressure. The crude product was purified by silica gel column chromatography to deliver **S-6**.

**Step 2:** General procedure for the synthesis of substrate **S-8**:<sup>[4]</sup>

To a solution of the **S-6** (3 mmol) and the phenylboronic acid **S-7** (3.3 mmol, 1.1 equiv.) in toluene (8 mL), ethanol (2 mL) and water (2 mL), Pd(PPh<sub>3</sub>)<sub>4</sub> (3 mol%) and K<sub>2</sub>CO<sub>3</sub> (7.5 mmol, 2.5 equiv.) were added. The resulting mixture was reflux 12 h under a nitrogen atmosphere. After completion of the reaction, the mixture was extracted three times with DCM. The combined organic phases were dried over anhydrous Na<sub>2</sub>SO<sub>4</sub>, filtered and concentrated under reduced pressure. The crude product was purified by silica gel column chromatography to deliver **S-8**.

**Step 3:** General procedure for the synthesis of substrate **S-9**:<sup>[4]</sup>

The resulted **S-8** was then dissolved in methanol. K<sub>2</sub>CO<sub>3</sub> (2.0 equiv.) was then added to the mixture. The resulting mixture was stirred 5 h at room temperature. After completion of the reaction, water was added and the crude reaction mixture was extracted with ethyl acetate for 2-3 times. The combined organic phases were washed with saturated NaCl, dried over anhydrous Na<sub>2</sub>SO<sub>4</sub>, filtered and concentrated under reduced pressure. The residue was purified by flash chromatography to afford **S-9**.

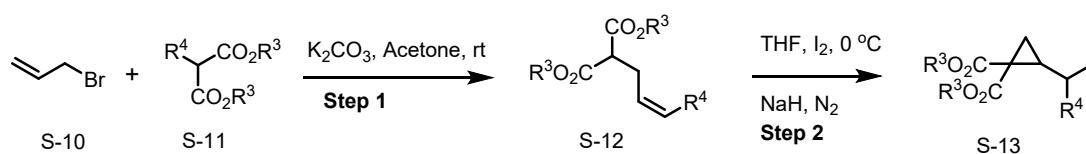

**Step 1:** General procedure for the synthesis of substrate **S-12**:<sup>[5]</sup>

**S-11** (8.8 mmol, 1.5 equiv.) and allyl bromide **S-10** (0.5 mL, 5.8 mmol, 1 equiv.) were added to a solution of potassium carbonate (2.4 g, 17.4 mmol, 3 equiv) in acetone (30 mL). The reaction mixture was allowed to stir for overnight at room temperature. The mixture was treated with a saturated NH<sub>4</sub>Cl solution and then was extracted dichloromethane. The organic layer was washed with water and brine, dried

over anhydrous Na<sub>2</sub>SO<sub>4</sub> and purification of the residue by column chromatography gave **S-12**.

**Step 2:** General procedure for the synthesis of substrate **S-13**:<sup>[5]</sup>

Under Ar atmosphere, to a solution of **S-12** (5 mmol) in THF (15 mL) was added to NaH (240 mg, 6 mmol) at 0 °C. After being stirred for 10 min, I<sub>2</sub> (1.27 g, 5 mmol) was successively added, and then the mixture was refluxed for 4 h. The mixture was poured into aqueous NH<sub>4</sub>Cl solution and the products were extracted with ether. The ether extracts were washed with aqueous Na<sub>2</sub>S<sub>2</sub>O<sub>3</sub> solution, dried over Na<sub>2</sub>SO<sub>4</sub>, and evaporated to dryness. Purification of the residue by column chromatography gave **S-13**.

## 7、 Characterization Data for Photocatalysis Products

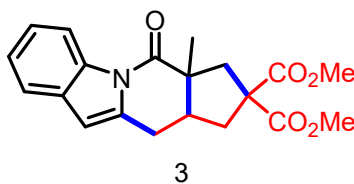

dimethyl 3*a*-methyl-4-oxo-3*a*,4,11,11*a*-tetrahydro-1*H*-cyclopenta[4,5]pyrido[1,2-*a*]indole-2,2(3*H*)-dicarboxylate (**3**): *dr* = 2.0:1

Pale yellow oil; Eluent: petroleum ether/ethyl acetate 25:1; 78.90 mg, 74%;

<sup>1</sup>H NMR (400 MHz, Chloroform-*d*) δ 8.46 - 8.37 (m, 1H), 7.45 (dd, *J* = 7.0, 2.8 Hz, 1H), 7.31 - 7.19 (m, 2H), 6.35 (d, *J* = 5.6 Hz, 1H), 3.78 (s, 2H), 3.75 (s, 1H), 3.73 (s, 2H), 3.58 (s, 1H), 3.32 (d, *J* = 14.6 Hz, 0.37H), 3.18 (dd, *J* = 16.3, 4.2 Hz, 1H), 3.06 (d, *J* = 19.4 Hz, 0.37H), 2.88 - 2.77 (m, 0.74H), 2.72 (d, *J* = 2.4 Hz, 1.33H), 2.65 (dd, *J* = 12.8, 6.4 Hz, 0.67H), 2.62 - 2.52 (m, 0.74H), 2.47 - 2.36 (m, 1H), 2.28 - 2.13 (m, 1H), 1.48 (s, 1H), 1.23 (s, 2H); <sup>13</sup>C NMR (101 MHz, Chloroform-*d*) δ 174.48, 172.71, 172.58, 137.39, 135.07, 130.38, 124.28, 123.86, 119.93, 116.30, 106.01, 57.69, 53.21, 53.18, 49.92, 43.11, 41.24, 36.33, 24.77, 17.57; HRMS (ESI-TOF) Calcd for Chemical Formula: C<sub>20</sub>H<sub>21</sub>NO<sub>5</sub>Na [M+Na]<sup>+</sup>: 378.1312; found: 378.1323.

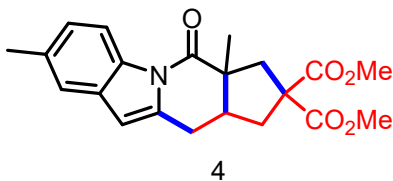

dimethyl 3*a*,8-dimethyl-4-oxo-3*a*,4,11,11*a*-tetrahydro-1*H*-cyclopenta[4,5]pyrido[1,2-*a*]indole-2,2(3*H*)-dicarboxylate (**4**): *dr* = 2.0:1

Pale yellow oil; Eluent: petroleum ether/ethyl acetate 25:1; 77.58 mg, 70%;

<sup>1</sup>H NMR (400 MHz, Chloroform-*d*) δ 8.27 (dd, *J* = 10.8, 8.3 Hz, 1H), 7.26 - 7.21 (m, 1H), 7.09 (dt, *J* = 8.5, 2.3 Hz, 1H), 6.27 (d, *J* = 6.9 Hz, 1H), 3.78 (s, 2H), 3.74 (s, 1H), 3.73 (s, 2H), 3.58 (s, 1H), 3.32 (d, *J* = 14.6 Hz, 0.36H), 3.15 (dd, *J* = 16.1, 3.9 Hz, 1H), 3.03 (dd, *J* = 17.0, 2.3 Hz, 0.36H), 2.87 - 2.76 (m, 0.72H), 2.71 (d, *J* = 2.9 Hz, 1.33H), 2.64 (dd, *J* = 12.8, 6.4 Hz, 0.69H), 2.61 - 2.50 (m, 0.72H), 2.46 - 2.37 (m, 4H), 2.27 - 2.13 (m, 1H), 1.47 (s, 1H), 1.22 (s, 2H); <sup>13</sup>C NMR (101 MHz, Chloroform-*d*) δ 174.27, 172.68, 172.56, 137.40, 133.34, 133.17, 130.59, 125.45, 119.93, 115.86, 105.76, 57.66, 53.16, 53.14, 49.81, 43.10, 41.22, 36.29, 24.74, 21.49, 17.54; HRMS (ESI-TOF) Calcd for Chemical Formula: C<sub>21</sub>H<sub>23</sub>NO<sub>5</sub>Na [M+Na]<sup>+</sup>: 392.1468; found: 392.1474.

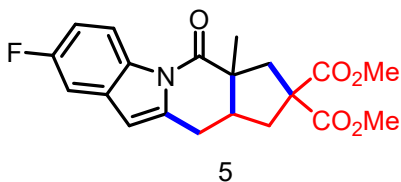

dimethyl 8-fluoro-3*a*-methyl-4-oxo-3*a*,4,11,11*a*-tetrahydro-1*H*-cyclopenta[4,5]pyrido[1,2-*a*]indole-2,2(3*H*)-dicarboxylate (**5**): *dr* = 1.7:1

Pale yellow oil; Eluent: petroleum ether/ethyl acetate 25:1; 80.65 mg, 72%;

<sup>1</sup>H NMR (400 MHz, Chloroform-*d*) δ 8.34 (td, *J* = 9.5, 4.8 Hz, 1H), 7.08 (dt, *J* = 8.9, 2.6 Hz, 1H), 7.00 - 6.91 (m, 1H), 6.29 (d, *J* = 7.9 Hz, 1H), 3.77 (s, 1.89H), 3.73 (s, 1.11H), 3.72 (s, 1.89H), 3.57 (s, 1.11H), 3.28 (d, *J* = 14.6 Hz, 0.38H), 3.16 (dd, *J* = 16.9, 4.2 Hz, 1H), 3.04 (dd, *J* = 17.3, 2.4 Hz, 0.39H), 2.85 - 2.76 (m, 0.68H), 2.69 (d, *J* = 3.7 Hz, 1.26H), 2.66 - 2.60 (m, 0.75H), 2.60 - 2.50 (m, 0.64H), 2.48 - 2.37 (m, 1H), 2.26 - 2.11 (m, 1H), 1.46 (s, 1.12H), 1.22 (s, 1.89H); <sup>13</sup>C NMR (101 MHz,

CDCl<sub>3</sub>)  $\delta$  174.18, 172.62, 172.47, 159.83 (d,  $J$  = 240.4 Hz), 139.14, 131.44, 131.35, 117.16 (d,  $J$  = 9.1 Hz), 111.65 (d,  $J$  = 25.3 Hz), 105.7 (d,  $J$  = 6.1 Hz), 105.56 (d,  $J$  = 14.1 Hz), 57.61, 53.19, 53.16, 49.74, 43.05, 41.16, 36.22, 24.77, 17.52; <sup>19</sup>F NMR (376 MHz, Chloroform-*d*)  $\delta$  -119.21; HRMS (ESI-TOF) Calcd for Chemical Formula: C<sub>20</sub>H<sub>20</sub>FNO<sub>5</sub>Na [M+Na]<sup>+</sup>: 396.1218; found: 396.1234.

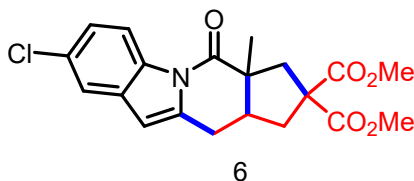

dimethyl 8-chloro-3*a*-methyl-4-oxo-3*a*,4,11,11*a*-tetrahydro-1*H*-cyclopenta[4,5]pyridine-2,2(3*H*)-dicarboxylate (**6**):  $dr$  = 2.0:1

Pale yellow oil; Eluent: petroleum ether/ethyl acetate 25:1; 87.71 mg, 75%;

<sup>1</sup>H NMR (400 MHz, Chloroform-*d*)  $\delta$  8.30 (dd,  $J$  = 10.9, 8.7 Hz, 1H), 7.42 - 7.36 (m, 1H), 7.20 (dt,  $J$  = 8.8, 1.9 Hz, 1H), 6.27 (d,  $J$  = 8.5 Hz, 1H), 3.77 (s, 2H), 3.73 (s, 1H), 3.72 (s, 2H), 3.57 (s, 1H), 3.27 (d,  $J$  = 14.5 Hz, 0.37H), 3.15 (dd,  $J$  = 16.0, 4.1 Hz, 1H), 3.04 (dd,  $J$  = 17.3, 2.4 Hz, 0.38H), 2.86 - 2.76 (m, 0.75H), 2.69 (d,  $J$  = 3.0 Hz, 1.33H), 2.63 (dd,  $J$  = 12.9, 6.4 Hz, 0.67H), 2.60 - 2.49 (m, 0.77H), 2.47 - 2.37 (m, 1H), 2.26 - 2.08 (m, 1H), 1.46 (s, 1H), 1.21 (s, 2H); <sup>13</sup>C NMR (101 MHz, Chloroform-*d*)  $\delta$  174.23, 172.59, 172.44, 138.89, 133.35, 131.61, 129.26, 124.22, 119.54, 117.16, 105.21, 57.59, 53.20, 53.17, 49.78, 42.98, 41.11, 36.20, 24.72, 17.49; HRMS (ESI-TOF) Calcd for Chemical Formula: C<sub>20</sub>H<sub>20</sub>ClNO<sub>5</sub>Na [M+Na]<sup>+</sup>: 412.0922; found: 412.0936.

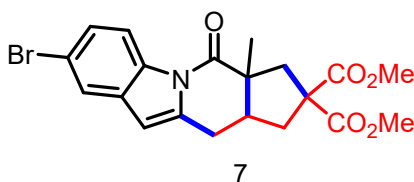

dimethyl 8-bromo-3*a*-methyl-4-oxo-3*a*,4,11,11*a*-tetrahydro-1*H*-cyclopenta[4,5]pyridine-2,2(3*H*)-dicarboxylate (**7**):  $dr$  = 2.2:1

Pale yellow oil; Eluent: petroleum ether/ethyl acetate 25:1; 92.50 mg, 71%;

$^1\text{H}$  NMR (400 MHz, Chloroform-*d*)  $\delta$  8.26 (dd,  $J$  = 10.8, 8.7 Hz, 1H), 7.59 - 7.53 (m, 1H), 7.35 (dd,  $J$  = 8.8, 1.8 Hz, 1H), 6.28 (d,  $J$  = 9.3 Hz, 1H), 3.77 (s, 2.08H), 3.73 (s, 0.94H), 3.73 (s, 2.07H), 3.57 (s, 0.93H), 3.28 (d,  $J$  = 14.5 Hz, 0.33H), 3.16 (dd,  $J$  = 16.4, 3.6 Hz, 1H), 3.04 (dd,  $J$  = 17.2, 2.4 Hz, 0.33H), 2.85 - 2.77 (m, 0.73H), 2.71 - 2.66 (m, 1.37H), 2.66 - 2.61 (m, 0.63H), 2.60 - 2.50 (m, 0.74H), 2.47 - 2.34 (m, 1H), 2.26 - 2.11 (m, 1H), 1.47 (s, 0.94H), 1.22 (s, 2.06H);  $^{13}\text{C}$  NMR (101 MHz, Chloroform-*d*)  $\delta$  174.27, 172.61, 172.46, 138.77, 133.72, 132.11, 126.97, 122.61, 117.59, 117.08, 105.11, 57.60, 53.23, 53.20, 49.83, 43.00, 41.12, 36.22, 24.73, 17.51; HRMS (ESI-TOF) Calcd for Chemical Formula:  $\text{C}_{20}\text{H}_{20}\text{BrNO}_5\text{Na}$   $[\text{M}+\text{Na}]^+$ : 456.0417; found: 456.0458.

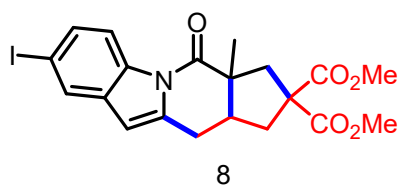

dimethyl 8-iodo-3a-methyl-4-oxo-3a,4,11,11a-tetrahydro-1H-cyclopenta[4,5]pyrido[1,2-*a*]indole-2,2(3H)-dicarboxylate (**8**):  $dr$  = 1.4:1

Pale yellow oil; Eluent: petroleum ether/ethyl acetate 25:1; 109.73 mg, 76%;

$^1\text{H}$  NMR (400 MHz, Chloroform-*d*)  $\delta$  8.15 (dd,  $J$  = 11.4, 8.6 Hz, 1H), 7.77 (dd,  $J$  = 3.6, 1.7 Hz, 1H), 7.52 (dd,  $J$  = 8.6, 1.8 Hz, 1H), 6.25 (d,  $J$  = 8.9 Hz, 1H), 3.77 (s, 1.76H), 3.73 (s, 1.25H), 3.72 (s, 1.75H), 3.57 (s, 1.24H), 3.27 (d,  $J$  = 14.6 Hz, 0.42H), 3.21 - 3.11 (m, 1H), 3.04 (dd,  $J$  = 17.2, 2.3 Hz, 0.41H), 2.86 - 2.76 (m, 0.64H), 2.69 (d,  $J$  = 3.1 Hz, 1.17H), 2.64 (dd,  $J$  = 13.0, 6.3 Hz, 0.82H), 2.58 - 2.49 (m, 0.59H), 2.46 - 2.37 (m, 1H), 2.26 - 2.07 (m, 1H), 1.46 (s, 1.24H), 1.21 (s, 1.76H);  $^{13}\text{C}$  NMR (101 MHz, Chloroform-*d*)  $\delta$  174.27, 172.57, 172.43, 138.38, 134.24, 132.73, 132.65, 128.74, 117.99, 104.84, 87.97, 57.58, 53.22, 53.19, 49.83, 42.96, 41.09, 36.20, 24.66, 17.49; HRMS (ESI-TOF) Calcd for Chemical Formula:  $\text{C}_{20}\text{H}_{20}\text{INO}_5\text{Na}$   $[\text{M}+\text{Na}]^+$ : 504.0278; found: 504.0298.

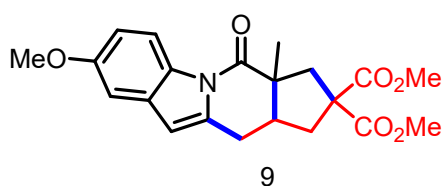

dimethyl 8-methoxy-3*a*-methyl-4-oxo-3*a*,4,11,11*a*-tetrahydro-1*H*-cyclopenta[4,5]pyr-  
-ido[1,2-*a*]indole-2,2(3*H*)-dicarboxylate (**9**):

Pale yellow oil; Eluent: petroleum ether/ethyl acetate 25:1; 53.19 mg, 46%;

<sup>1</sup>H NMR (400 MHz, Chloroform-*d*) δ 8.28 (d, *J* = 9.0 Hz, 1H), 6.93 (d, *J* = 2.5 Hz, 1H), 6.87 (dd, *J* = 8.9, 2.6 Hz, 1H), 6.27 (s, 1H), 3.84 (s, 3H), 3.78 (s, 3H), 3.73 (s, 3H), 3.16 (dd, *J* = 16.4, 4.0 Hz, 1H), 2.86 - 2.75 (m, 1H), 2.75 - 2.66 (m, 2H), 2.66 - 2.61 (m, 1H), 2.61 - 2.51 (m, 1H), 2.21 (t, *J* = 12.6 Hz, 1H), 1.22 (s, 3H); <sup>13</sup>C NMR (101 MHz, Chloroform-*d*) δ 174.14, 172.75, 172.61, 156.69, 138.16, 131.41, 129.72, 117.00, 112.24, 105.92, 103.19, 57.70, 55.77, 53.23, 53.20, 49.77, 43.20, 41.27, 36.34, 24.83, 17.62; HRMS (ESI-TOF) Calcd for Chemical Formula: C<sub>21</sub>H<sub>23</sub>NO<sub>6</sub>Na [M+Na]<sup>+</sup>: 408.1418; found: 408.1429.

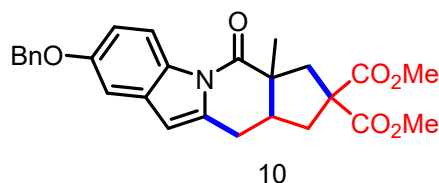

dimethyl 8-(benzyloxy)-3*a*-methyl-4-oxo-3*a*,4,11,11*a*-tetrahydro-1*H*-cyclopenta[4,5]  
pyrido[1,2-*a*]indole-2,2(3*H*)-dicarboxylate (**10**): *dr* = 2.4:1

Pale yellow oil; Eluent: petroleum ether/ethyl acetate 25:1; 78.92 mg, 57%;

<sup>1</sup>H NMR (400 MHz, Chloroform-*d*) δ 8.31 (t, *J* = 9.3 Hz, 1H), 7.48 - 7.43 (m, 2H), 7.38 (td, *J* = 7.3, 1.5 Hz, 2H), 7.35 - 7.28 (m, 1H), 7.04 - 6.99 (m, 1H), 6.99 - 6.92 (m, 1H), 6.27 (d, *J* = 6.0 Hz, 1H), 5.10 (d, *J* = 2.4 Hz, 2H), 3.78 (s, 2.12H), 3.75 (s, 0.88H), 3.74 (s, 2.11H), 3.59 (s, 0.89H), 3.32 (d, *J* = 14.6 Hz, 0.3H), 3.15 (dd, *J* = 16.4, 4.2 Hz, 1H), 3.03 (dd, *J* = 17.0, 2.2 Hz, 0.31H), 2.84 - 2.75 (m, 0.73H), 2.74 - 2.66 (m, 1.44H), 2.66 - 2.61 (m, 0.59H), 2.60 - 2.52 (m, 0.71H), 2.48 - 2.32 (m, 1H), 2.27 - 2.10 (m, 1H), 1.47 (s, 0.89H), 1.23 (s, 2.13H); <sup>13</sup>C NMR (101 MHz, Chloroform-*d*) δ 174.08, 172.69, 172.56, 155.84, 138.17, 137.39, 131.36, 129.88, 128.64, 127.55, 116.99, 113.07, 105.90, 104.56, 70.61, 57.68, 53.17, 53.15, 49.74, 43.16, 41.25, 36.30, 24.78, 17.57; HRMS (ESI-TOF) Calcd for Chemical Formula: C<sub>27</sub>H<sub>27</sub>NO<sub>6</sub>Na [M+Na]<sup>+</sup>: 484.1731; found: 484.1750.

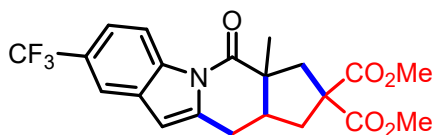

11

dimethyl 3*a*-methyl-4-oxo-8-(trifluoromethyl)-3*a*,4,11,11*a*-tetrahydro-1*H*-cyclopenta[4,5]pyrido[1,2-*a*]indole-2,2(3*H*)-dicarboxylate (**11**): *dr* = 1.5:1

Pale yellow oil; Eluent: petroleum ether/ethyl acetate 25:1; 86.37 mg, 68%;

<sup>1</sup>H NMR (400 MHz, Chloroform-*d*) δ 8.54 - 8.44 (m, 1H), 7.72 (d, *J* = 2.0 Hz, 1H), 7.50 (dd, *J* = 8.7, 1.8 Hz, 1H), 6.40 (d, *J* = 8.3 Hz, 1H), 3.78 (s, 1.81H), 3.74 (s, 1.19H), 3.73 (s, 1.81H), 3.57 (s, 1.2H), 3.29 (d, *J* = 14.5 Hz, 0.41H), 3.25 - 3.15 (m, 1H), 3.09 (dd, *J* = 17.2, 2.5 Hz, 0.41H), 2.88 - 2.79 (m, 0.64H), 2.71 (d, *J* = 1.7 Hz, 1.21H), 2.69 - 2.63 (m, 0.63H), 2.62 - 2.47 (m, 0.82H), 2.45 - 2.35 (m, 1H), 2.28 - 2.09 (m, 1H), 1.48 (s, 1.21H), 1.23 (s, 1.8H); <sup>13</sup>C NMR (101 MHz, Chloroform-*d*) δ 174.43, 172.60, 172.43, 139.35, 136.59, 130.11, 126.11 (q, *J* = 26.3Hz), 123.44, 120.97 (q, *J* = 3.0 Hz), 117.23 (q, *J* = 3.0 Hz), 116.40, 105.82, 57.60, 53.22, 53.19, 49.91, 43.43, 42.93, 36.20, 24.73, 17.47; <sup>19</sup>F NMR (376 MHz, Chloroform-*d*) δ -61.14; HRMS (ESI-TOF) Calcd for Chemical Formula: C<sub>21</sub>H<sub>20</sub>F<sub>3</sub>NO<sub>5</sub>Na [M+Na]<sup>+</sup>: 446.1186; found: 446.1208.

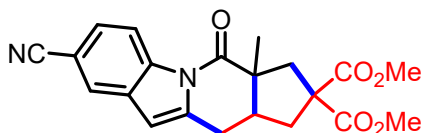

12

dimethyl 8-cyano-3*a*-methyl-4-oxo-3*a*,4,11,11*a*-tetrahydro-1*H*-cyclopenta[4,5]pyrido[1,2-*a*]indole-2,2(3*H*)-dicarboxylate (**12**): *dr* = 1.5:1

White solid; Eluent: petroleum ether/ethyl acetate 25:1; 93.58 mg, 82%;

<sup>1</sup>H NMR (400 MHz, Chloroform-*d*) δ 8.47 (dd, *J* = 10.2, 8.5 Hz, 1H), 7.75 (d, *J* = 1.7 Hz, 1H), 7.50 (dd, *J* = 8.5, 1.6 Hz, 1H), 6.40 (d, *J* = 7.6 Hz, 1H), 3.77 (s, 1.82H), 3.73 (s, 1.19H), 3.72 (s, 1.8H), 3.57 (s, 1.2H), 3.27 (s, 0.4H), 3.24 - 3.15 (m, 1H), 3.10 (dd, *J* = 17.2, 2.6 Hz, 0.41H), 2.91 - 2.79 (m, 0.62H), 2.69 (d, *J* = 2.0 Hz, 1.25H), 2.67 - 2.58 (m, 0.82H), 2.58 - 2.47 (m, 0.62H), 2.45 - 2.35 (m, 1H), 2.28 - 2.08 (m, 1H),

1.48 (s, 1.22H), 1.23 (s, 1.83H);  $^{13}\text{C}$  NMR (101 MHz, Chloroform-*d*)  $\delta$  174.37, 172.51, 172.33, 139.97, 136.90, 130.37, 127.46, 124.52, 119.76, 116.93, 107.05, 105.38, 57.53, 53.25, 53.22, 49.91, 42.81, 41.01, 36.13, 24.71, 17.45; HRMS (ESI-TOF) Calcd for Chemical Formula:  $\text{C}_{21}\text{H}_{20}\text{N}_2\text{O}_5\text{Na}$   $[\text{M}+\text{Na}]^+$ : 403.1264; found: 403.1307.

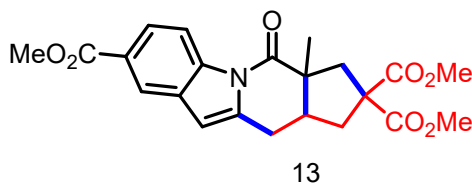

trimethyl 3*a*-methyl-4-oxo-3*a*,4,11,11*a*-tetrahydro-1*H*-cyclopenta[4,5]pyrido[1,2-*a*]indole-2,2,8(3*H*)-tricarboxylate (**13**):

Pale yellow oil; Eluent: petroleum ether/ethyl acetate 25:1; 32.25 mg, 26%;

$^1\text{H}$  NMR (400 MHz, Chloroform-*d*)  $\delta$  8.45 (d,  $J$  = 8.7 Hz, 1H), 8.18 (d,  $J$  = 1.6 Hz, 1H), 7.98 (dd,  $J$  = 8.7, 1.7 Hz, 1H), 6.43 (s, 1H), 3.93 (s, 3H), 3.75 (s, 3H), 3.57 (s, 3H), 3.30 (d,  $J$  = 14.5 Hz, 1H), 3.23 - 3.03 (m, 2H), 2.50 - 2.30 (m, 3H), 2.23 - 2.10 (m, 1H), 1.49 (s, 3H);  $^{13}\text{C}$  NMR (101 MHz, Chloroform-*d*)  $\delta$  173.61, 172.87, 171.94, 167.59, 138.08, 136.95, 130.08, 126.00, 125.85, 121.94, 116.33, 106.91, 57.48, 53.20, 53.15, 52.19, 51.50, 45.15, 43.50, 38.29, 23.67, 22.71; HRMS (ESI-TOF) Calcd for Chemical Formula:  $\text{C}_{22}\text{H}_{23}\text{NO}_7\text{Na}$   $[\text{M}+\text{Na}]^+$ : 436.1367; found: 436.1443.

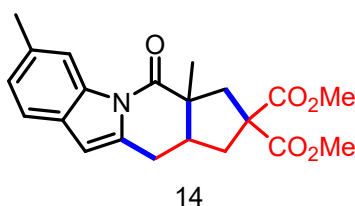

dimethyl 3*a*,7-dimethyl-4-oxo-3*a*,4,11,11*a*-tetrahydro-1*H*-cyclopenta[4,5]pyrido[1,2-*a*]indole-2,2(3*H*)-dicarboxylate (**14**):  $dr$  = 2.0:1

Pale yellow oil; Eluent: petroleum ether/ethyl acetate 25:1; 85.34 mg, 77%;

$^1\text{H}$  NMR (400 MHz, Chloroform-*d*)  $\delta$  8.27 (d,  $J$  = 12.4 Hz, 1H), 7.32 (dd,  $J$  = 7.9, 2.4 Hz, 1H), 7.06 (dd,  $J$  = 8.0, 2.6 Hz, 1H), 6.29 (d,  $J$  = 7.1 Hz, 1H), 3.78 (s, 2H), 3.75 (s, 1H), 3.73 (s, 2H), 3.59 (s, 1H), 3.33 (d,  $J$  = 14.6 Hz, 0.36H), 3.15 (dd,  $J$  = 16.3, 4.3

Hz, 1H), 3.03 (dd,  $J = 16.8, 2.4$  Hz, 0.39H), 2.86 - 2.75 (m, 0.77H), 2.71 (s, 1.38H), 2.69 - 2.58 (m, 1H), 2.58 - 2.50 (m, 0.72H), 2.46 (d,  $J = 2.5$  Hz, 3H), 2.43 - 2.37 (m, 0.69H), 2.27 - 2.08 (m, 1H), 1.47 (s, 1H), 1.22 (s, 2H);  $^{13}\text{C}$  NMR (101 MHz, Chloroform- $d$ )  $\delta$  174.51, 172.68, 172.54, 136.63, 135.38, 134.23, 128.01, 125.11, 119.44, 116.55, 105.86, 57.65, 53.15, 53.12, 49.87, 43.03, 41.22, 36.28, 24.70, 21.88, 17.53; HRMS (ESI-TOF) Calcd for Chemical Formula:  $\text{C}_{21}\text{H}_{23}\text{NO}_5\text{Na}$   $[\text{M}+\text{Na}]^+$ : 392.1468; found: 392.1472.

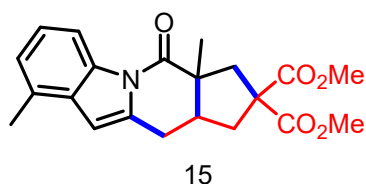

dimethyl 3a,9-dimethyl-4-oxo-3a,4,11,11a-tetrahydro-1H-cyclopenta[4,5]pyrido[1,2-a]indole-2,2(3H)-dicarboxylate (**15**):  $dr = 2.0:1$

Pale yellow oil; Eluent: petroleum ether/ethyl acetate 25:1; 77.58 mg, 70%;

$^1\text{H}$  NMR (400 MHz, Chloroform- $d$ )  $\delta$  8.25 (dd,  $J = 11.3, 8.2$  Hz, 1H), 7.18 (td,  $J = 7.8, 2.8$  Hz, 1H), 7.08 - 7.01 (m, 1H), 6.40 (d,  $J = 5.4$  Hz, 1H), 3.78 (s, 2H), 3.75 (s, 1H), 3.74 (s, 2H), 3.58 (s, 1H), 3.33 (d,  $J = 14.6$  Hz, 0.38H), 3.20 (dd,  $J = 16.1, 4.1$  Hz, 1H), 3.11 - 3.03 (m, 0.35H), 2.89 - 2.79 (m, 0.7H), 2.71 (d,  $J = 2.2$  Hz, 1.38H), 2.65 (dd,  $J = 12.8, 6.4$  Hz, 0.7H), 2.62 - 2.52 (m, 1H), 2.48 (s, 1H), 2.47 (s, 2H), 2.45 - 2.40 (m, 0.77H), 2.27 - 2.14 (m, 1H), 1.48 (s, 1H), 1.23 (s, 2H);  $^{13}\text{C}$  NMR (101 MHz, Chloroform- $d$ )  $\delta$  174.53, 172.75, 172.62, 136.77, 134.83, 129.90, 129.30, 124.40, 124.35, 113.86, 104.50, 57.72, 53.23, 53.19, 49.95, 43.14, 41.28, 36.38, 24.86, 18.54, 17.56; HRMS (ESI-TOF) Calcd for Chemical Formula:  $\text{C}_{21}\text{H}_{23}\text{NO}_5\text{Na}$   $[\text{M}+\text{Na}]^+$ : 392.1468; found: 392.1474.

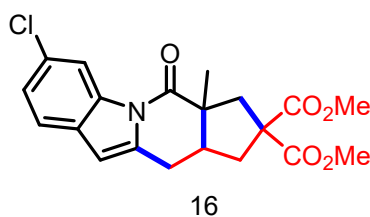

dimethyl 7-chloro-3a-methyl-4-oxo-3a,4,11,11a-tetrahydro-1H-cyclopenta[4,5]pyrido[1,2-a]indole-2,2(3H)-dicarboxylate (**16**):  $dr = 2.0:1$

Pale yellow oil; Eluent: petroleum ether/ethyl acetate 25:1; 81.86 mg, 70%;

$^1\text{H}$  NMR (400 MHz, Chloroform-*d*)  $\delta$  8.45 (dd,  $J$  = 12.4, 1.9 Hz, 1H), 7.34 (dd,  $J$  = 8.3, 3.3 Hz, 1H), 7.24 - 7.16 (m, 1H), 6.31 (d,  $J$  = 7.8 Hz, 1H), 3.78 (s, 2H), 3.74 (s, 1H), 3.73 (s, 2H), 3.60 (s, 1H), 3.29 (d,  $J$  = 14.5 Hz, 0.38H), 3.16 (dd,  $J$  = 16.7, 4.1 Hz, 1H), 3.04 (dd,  $J$  = 17.2, 2.5 Hz, 0.37H), 2.85 - 2.76 (m, 0.69H), 2.70 (d,  $J$  = 3.3 Hz, 1.35H), 2.64 (dd,  $J$  = 12.8, 6.3 Hz, 0.77H), 2.61 - 2.51 (m, 0.74H), 2.48 - 2.37 (m, 1H), 2.27 - 2.14 (m, 1H), 1.47 (s, 1H), 1.22 (s, 2H);  $^{13}\text{C}$  NMR (101 MHz, Chloroform-*d*)  $\delta$  174.33, 172.66, 172.50, 138.09, 135.31, 130.08, 128.81, 124.31, 120.55, 116.53, 105.61, 57.64, 53.25, 53.22, 49.86, 42.98, 41.15, 36.26, 24.75, 17.53; HRMS (ESI-TOF) Calcd for Chemical Formula:  $\text{C}_{20}\text{H}_{20}\text{ClNO}_5\text{Na}$   $[\text{M}+\text{Na}]^+$ : 412.0922; found: 412.0944.

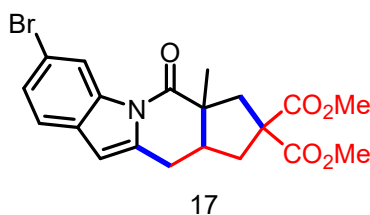

dimethyl 7-bromo-3a-methyl-4-oxo-3a,4,11,11a-tetrahydro-1H-cyclopenta[4,5]pyridine-2,2(3H)-dicarboxylate (**17**):  $dr$  = 1.6:1

Pale yellow oil; Eluent: petroleum ether/ethyl acetate 25:1; 89.90 mg, 69%;

$^1\text{H}$  NMR (400 MHz, Chloroform-*d*)  $\delta$  8.56 (dd,  $J$  = 12.4, 1.7 Hz, 1H), 7.32 - 7.27 (m, 1H), 7.26 - 7.20 (m, 1H), 6.26 (d,  $J$  = 7.7 Hz, 1H), 3.73 (s, 1.84H), 3.69 (s, 1.13H), 3.69 (s, 1.85H), 3.55 (s, 1.13H), 3.25 (d,  $J$  = 14.6 Hz, 0.4H), 3.16 - 3.05 (m, 1H), 3.00 (dd,  $J$  = 17.1, 2.3 Hz, 0.39H), 2.78-2.70 (m, 0.67H), 2.65 (d,  $J$  = 3.4 Hz, 1.3H), 2.62 - 2.55 (m, 0.82H), 2.55 - 2.46 (m, 0.64H), 2.43 - 2.33 (m, 1H), 2.21 - 2.08 (m, 1H), 1.42 (s, 1.14H), 1.17 (s, 1.85H);  $^{13}\text{C}$  NMR (101 MHz, Chloroform-*d*)  $\delta$  174.31, 172.66, 172.51, 138.03, 135.64, 129.18, 127.03, 120.97, 119.37, 117.81, 105.67, 57.63, 53.27, 53.20, 49.86, 42.98, 41.14, 36.26, 24.75, 17.54; HRMS (ESI-TOF) Calcd for Chemical Formula:  $\text{C}_{20}\text{H}_{20}\text{BrNO}_5\text{Na}$   $[\text{M}+\text{Na}]^+$ : 456.0417; found: 456.0427.

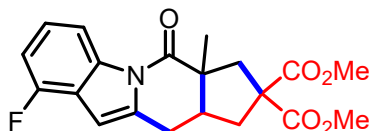

18

dimethyl 9-fluoro-3*a*-methyl-4-oxo-3*a*,4,11,11*a*-tetrahydro-1*H*-cyclopenta[4,5]pyridino[1,2-*a*]indole-2,2(3*H*)-dicarboxylate (**18**): *dr* = 2.0:1

Pale yellow oil; Eluent: petroleum ether/ethyl acetate 25:1; 56.01 mg, 50%;

<sup>1</sup>H NMR (400 MHz, Chloroform-*d*)  $\delta$  8.18 (dd, *J* = 10.8, 8.2 Hz, 1H), 7.25 - 7.14 (m, 1H), 6.97 - 6.87 (m, 1H), 6.45 (d, *J* = 8.6 Hz, 1H), 3.78 (s, 2H), 3.74 (s, 1H), 3.73 (s, 2H), 3.57 (s, 1H), 3.29 (d, *J* = 14.6 Hz, 0.37H), 3.18 (dt, *J* = 16.7, 4.8 Hz, 1H), 3.07 (dd, *J* = 17.1, 2.3 Hz, 0.36H), 2.88 - 2.77 (m, 0.71H), 2.70 (s, 1.33H), 2.68 - 2.62 (m, 0.74H), 2.62 - 2.52 (m, 0.69H), 2.49 - 2.38 (m, 1H), 2.28 - 2.09 (m, 1H), 1.48 (s, 1H), 1.23 (s, 2H); <sup>13</sup>C NMR (101 MHz, Chloroform-*d*)  $\delta$  174.46, 172.63, 172.49, 155.10 (d, *J* = 247.5 Hz), 137.50, 137.14 (d, *J* = 9.1 Hz), 125.04 (d, *J* = 7.1 Hz), 118.97 (d, *J* = 21.2 Hz), 112.37 (d, *J* = 4.0 Hz), 109.28 (d, *J* = 19.2 Hz), 101.39, 57.66, 53.22, 53.20, 49.90, 43.00, 41.15, 36.23, 24.76, 17.52; <sup>19</sup>F NMR (376 MHz, Chloroform-*d*)  $\delta$  -122.85; HRMS (ESI-TOF) Calcd for Chemical Formula: C<sub>20</sub>H<sub>20</sub>FN<sub>2</sub>O<sub>5</sub>Na [M+Na]<sup>+</sup>: 396.1218; found: 396.1231.

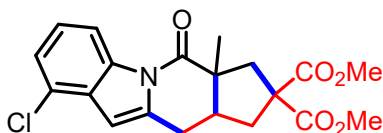

19

dimethyl 9-chloro-3*a*-methyl-4-oxo-3*a*,4,11,11*a*-tetrahydro-1*H*-cyclopenta[4,5]pyridino[1,2-*a*]indole-2,2(3*H*)-dicarboxylate (**19**): *dr* = 1.7:1

Pale yellow oil; Eluent: petroleum ether/ethyl acetate 25:1; 81.86 mg, 70%;

<sup>1</sup>H NMR (400 MHz, Chloroform-*d*)  $\delta$  8.36 (dd, *J* = 11.7, 7.7 Hz, 1H), 7.34 - 7.20 (m, 2H), 6.54 (d, *J* = 9.2 Hz, 1H), 3.84 (s, 1.91H), 3.80 (s, 1.11H), 3.79 (s, 1.89H), 3.63 (s, 1.12H), 3.35 (d, *J* = 14.6 Hz, 0.38H), 3.31 - 3.19 (m, 1H), 3.14 (dd, *J* = 17.2, 2.3 Hz, 0.38H), 2.95 - 2.84 (m, 0.66H), 2.76 (s, 1.28H), 2.71 (dd, *J* = 12.8, 6.3 Hz, 0.74H), 2.63 (d, *J* = 4.7 Hz, 0.63H), 2.54 - 2.44 (m, 1H), 2.33 - 2.17 (m, 1H), 1.53 (s, 1.13H), 1.28 (s, 1.91H); <sup>13</sup>C NMR (101 MHz, Chloroform-*d*)  $\delta$  174.42, 172.62, 172.47,

138.22, 135.69, 129.06, 125.11, 125.01, 123.61, 114.75, 104.04, 57.62, 53.25, 53.22, 49.87, 42.95, 41.12, 36.23, 24.80, 17.51; HRMS (ESI-TOF) Calcd for Chemical Formula: C<sub>20</sub>H<sub>20</sub>ClNO<sub>5</sub>Na [M+Na]<sup>+</sup>: 412.0922; found: 412.0940.

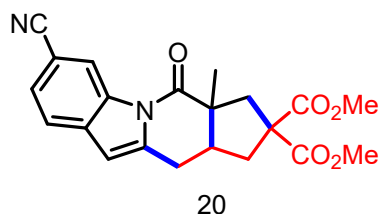

dimethyl 7-cyano-3a-methyl-4-oxo-3a,4,11,11a-tetrahydro-1H-cyclopenta[4,5]pyrido[1,2-a]indole-2,2(3H)-dicarboxylate (**20**): *dr* = 1.5:1

Pale yellow oil; Eluent: petroleum ether/ethyl acetate 25:1; 9.61 mg, 61%;

<sup>1</sup>H NMR (400 MHz, Chloroform-*d*) δ 8.73 (d, *J* = 10.4 Hz, 1H), 7.55 - 7.43 (m, 2H), 6.42 (d, *J* = 7.2 Hz, 1H), 3.78 (s, 1.79H), 3.74 (s, 3H), 3.60 (s, 1.22H), 3.27 (d, *J* = 14.3 Hz, 0.42H), 3.25 - 3.17 (m, 1H), 3.11 (d, *J* = 17.1 Hz, 0.43H), 2.93 - 2.81 (m, 0.65H), 2.76 - 2.68 (m, 1.29H), 2.68 - 2.60 (m, 0.87H), 2.59 - 2.49 (m, 0.62H), 2.48 - 2.37 (m, 1H), 2.28 - 2.10 (m, 1H), 1.49 (s, 1.22H), 1.24 (s, 1.86H); <sup>13</sup>C NMR (101 MHz, Chloroform-*d*) δ 174.21, 172.56, 172.38, 141.42, 134.04, 133.71, 127.17, 120.67, 120.54, 106.92, 105.89, 57.55, 53.31, 53.28, 49.85, 42.89, 41.02, 36.16, 24.86, 17.49; HRMS (ESI-TOF) Calcd for Chemical Formula: C<sub>21</sub>H<sub>20</sub>N<sub>2</sub>O<sub>5</sub>Na [M+Na]<sup>+</sup>: 403.1264; found: 403.1274.

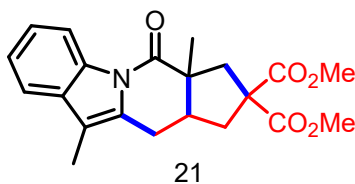

dimethyl 3a,10-dimethyl-4-oxo-3a,4,11,11a-tetrahydro-1H-cyclopenta[4,5]pyrido[1,2-a]indole-2,2(3H)-dicarboxylate (**21**): *dr* = 1.4:1

Pale yellow oil; Eluent: petroleum ether/ethyl acetate 25:1; 76.47 mg, 69%;

<sup>1</sup>H NMR (400 MHz, Chloroform-*d*) δ 8.46 - 8.34 (m, 1H), 7.41 (dt, *J* = 6.1, 1.9 Hz, 1H), 7.32 - 7.20 (m, 2H), 3.77 (s, 1.74H), 3.73 (s, 1.26H), 3.72 (s, 1.74H), 3.58 (s, 1.26H), 3.33 (d, *J* = 14.5 Hz, 0.43H), 3.12 (dd, *J* = 15.8, 4.2 Hz, 0.59H), 3.02 (d, *J* =

2.8 Hz, 0.84H), 2.70 (d,  $J = 1.3$  Hz, 1.21H), 2.68 - 2.62 (m, 1H), 2.61 - 2.50 (m, 0.61H), 2.43 (d,  $J = 5.5$  Hz, 0.42H), 2.42 - 2.33 (m, 1H), 2.27 - 2.09 (m, 4H), 1.45 (s, 1.24H), 1.20 (s, 1.72H);  $^{13}\text{C}$  NMR (101 MHz, Chloroform- $d$ )  $\delta$  174.21, 172.72, 172.60, 134.73, 132.62, 131.53, 124.37, 123.56, 117.95, 116.14, 113.34, 57.73, 53.15, 53.13, 49.83, 42.80, 41.21, 36.43, 23.12, 17.51, 8.61; HRMS (ESI-TOF) Calcd for Chemical Formula:  $\text{C}_{21}\text{H}_{23}\text{NO}_5\text{Na}$   $[\text{M}+\text{Na}]^+$ : 392.1468; found: 392.1474.

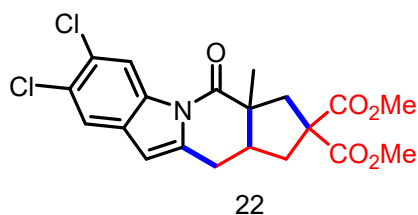

dimethyl 3a,10-dimethyl-4-oxo-3a,4,11,11a-tetrahydro-1H-cyclopenta[4,5]pyrido[1,2-a]indole-2,2(3H)-dicarboxylate (**22**):  $dr = 1.6:1$

Pale yellow oil; Eluent: petroleum ether/ethyl acetate 25:1; 82.73 mg, 65%;

$^1\text{H}$  NMR (400 MHz, Chloroform- $d$ )  $\delta$  8.52 (d,  $J = 17.3$  Hz, 1H), 7.47 (d,  $J = 5.1$  Hz, 1H), 6.25 (d,  $J = 10.7$  Hz, 1H), 3.77 (s, 1.92H), 3.73 (s, 3H), 3.59 (s, 1.18H), 3.26 (d,  $J = 14.6$  Hz, 0.41H), 3.16 (dd,  $J = 16.4, 4.1$  Hz, 1H), 3.04 (dd,  $J = 17.1, 2.5$  Hz, 0.42H), 2.86 - 2.74 (m, 0.68H), 2.68 (d,  $J = 3.1$  Hz, 1.29H), 2.64 (dd,  $J = 12.8, 6.4$  Hz, 0.82H), 2.58 - 2.50 (m, 0.64H), 2.47 - 2.37 (m, 1H), 2.28 - 2.11 (m, 1H), 1.46 (s, 1.18H), 1.21 (s, 1.91H);  $^{13}\text{C}$  NMR (101 MHz, Chloroform- $d$ )  $\delta$  174.09, 172.57, 172.41, 139.44, 133.57, 129.96, 127.95, 127.91, 120.79, 117.84, 104.83, 57.58, 53.26, 53.22, 49.75, 42.89, 41.04, 36.17, 24.72, 17.50; HRMS (ESI-TOF) Calcd for Chemical Formula:  $\text{C}_{20}\text{H}_{19}\text{Cl}_2\text{NO}_5\text{Na}$   $[\text{M}+\text{Na}]^+$ : 446.0532; found: 446.0581.

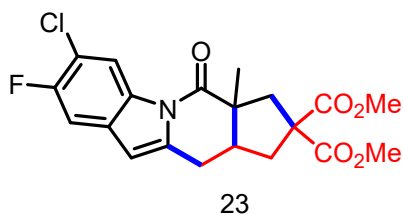

dimethyl 7-chloro-8-fluoro-3a-methyl-4-oxo-3a,4,11,11a-tetrahydro-1H-cyclopenta[4,5]pyrido[1,2-a]indole-2,2(3H)-dicarboxylate (**23**):  $dr = 1.3:1$

Pale yellow oil; Eluent: petroleum ether/ethyl acetate 25:1; 72.18 mg, 59%;

$^1\text{H}$  NMR (400 MHz, Chloroform-*d*)  $\delta$  8.47 (dd,  $J$  = 15.7, 6.7 Hz, 1H), 7.15 (dd,  $J$  = 9.0, 4.2 Hz, 1H), 6.27 (d,  $J$  = 8.8 Hz, 1H), 3.77 (s, 1.71H), 3.73 (s, 1.29H), 3.73 (s, 1.71H), 3.59 (s, 1.29H), 3.26 (d,  $J$  = 14.6 Hz, 0.45H), 3.16 (dt,  $J$  = 15.7, 3.3 Hz, 1H), 3.04 (dd,  $J$  = 17.2, 2.4 Hz, 0.45H), 2.84 - 2.75 (m, 0.6H), 2.68 (d,  $J$  = 4.3 Hz, 1.13H), 2.67 - 2.57 (m, 0.88H), 2.57 - 2.45 (m, 0.6H), 2.44 - 2.34 (m, 1H), 2.27 - 2.08 (m, 1H), 1.46 (s, 1.31H), 1.21 (s, 1.7H);  $^{13}\text{C}$  NMR (101 MHz, Chloroform-*d*)  $\delta$  174.06, 172.59, 172.43, 155.07 (d,  $J$  = 243.4 Hz), 139.53, 131.15 (d,  $J$  = 27.3 Hz), 129.69 (d,  $J$  = 9.1 Hz), 117.82, 117.17 (d,  $J$  = 21.2 Hz), 106.46 (d,  $J$  = 23.2 Hz), 105.34 (d,  $J$  = 4.0 Hz), 57.58, 53.25, 53.21, 49.70, 42.95, 41.07, 36.17, 24.74, 17.50;  $^{19}\text{F}$  NMR (376 MHz, Chloroform-*d*)  $\delta$  -120.90; HRMS (ESI-TOF) Calcd for Chemical Formula:  $\text{C}_{20}\text{H}_{19}\text{ClFNO}_5\text{Na}$   $[\text{M}+\text{Na}]^+$ : 430.0828; found: 430.0837.

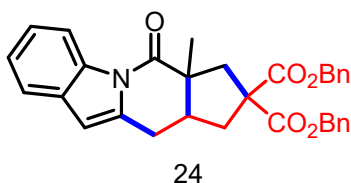

dibenzyl 3*a*-methyl-4-oxo-3*a*,4,11,11*a*-tetrahydro-1*H*-cyclopenta[4,5]pyrido[1,2-*a*]indole-2,2(3*H*)-dicarboxylate (**24**):

Pale yellow oil; Eluent: petroleum ether/ethyl acetate 25:1; 60.91 mg, 40%;

$^1\text{H}$  NMR (400 MHz, Chloroform-*d*)  $\delta$  8.35 (d,  $J$  = 7.9 Hz, 1H), 7.39 (d,  $J$  = 6.8 Hz, 1H), 7.31 - 7.15 (m, 12H), 6.27 (s, 1H), 5.15 - 5.04 (m, 4H), 3.09 (dd,  $J$  = 16.6, 4.5 Hz, 1H), 2.80 - 2.67 (m, 3H), 2.59 (dd,  $J$  = 12.9, 6.4 Hz, 1H), 2.56 - 2.44 (m, 1H), 2.19 (t,  $J$  = 12.7 Hz, 1H), 1.14 (s, 3H);  $^{13}\text{C}$  NMR (101 MHz, Chloroform-*d*)  $\delta$  174.41, 171.86, 171.74, 137.36, 135.35, 135.26, 135.04, 130.36, 128.68, 128.52, 128.49, 128.26, 128.17, 124.26, 123.84, 119.91, 116.29, 105.97, 67.67, 57.90, 49.91, 43.04, 41.19, 36.21, 24.75, 17.52; HRMS (ESI-TOF) Calcd for Chemical Formula:  $\text{C}_{32}\text{H}_{29}\text{NO}_5\text{Na}$   $[\text{M}+\text{Na}]^+$ : 530.1938; found: 530.1978.

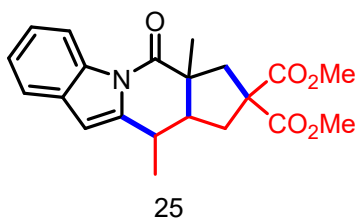

dimethyl 3a,11-dimethyl-4-oxo-3a,4,11,11a-tetrahydro-1H-cyclopenta[4,5]pyrido[1,2-a]indole-2,2(3H)-dicarboxylate (**25**):  $dr = 1.3:1$

Pale yellow oil; Eluent: petroleum ether/ethyl acetate 25:1; 45.44 mg, 41%;

$^1\text{H}$  NMR (400 MHz, Chloroform-*d*)  $\delta$  8.49 - 8.38 (m, 1H), 7.50 - 7.43 (m, 1H), 7.32 - 7.18 (m, 2H), 6.37 (dd,  $J = 10.1, 1.4$  Hz, 1H), 3.78 (s, 1.29H), 3.78 (s, 1.71H), 3.73 (s, 1.31H), 3.66 (s, 1.7H), 3.04 - 3.00 (m, 0.58H), 2.97 (d,  $J = 14.4$  Hz, 1H), 2.70 (d,  $J = 12.0$  Hz, 1.13H), 2.68 - 2.65 (m, 0.87H), 2.63 (d,  $J = 2.7$  Hz, 0.43H), 2.44 - 2.37 (m, 0.58H), 2.30 - 2.23 (m, 0.42H), 2.22 (d,  $J = 7.4$  Hz, 0.43H), 2.14 (td,  $J = 7.4, 5.8$  Hz, 0.56H), 1.48 (s, 1.71H), 1.44 (dd,  $J = 8.7, 6.7$  Hz, 3H), 1.24 (s, 1.31H);  $^{13}\text{C}$  NMR (101 MHz, Chloroform-*d*)  $\delta$  173.00, 172.75, 172.45, 141.79, 135.52, 130.33, 124.30, 124.09, 120.00, 116.49, 105.32, 58.02, 53.23, 53.22, 50.84, 50.04, 44.51, 38.24, 30.07, 25.56, 19.36; HRMS (ESI-TOF) Calcd for Chemical Formula:  $\text{C}_{21}\text{H}_{23}\text{NO}_5\text{Na}$   $[\text{M}+\text{Na}]^+$ : 392.1468; found: 392.1476.

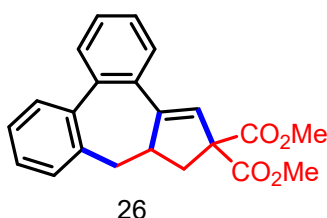

dimethyl 7a,8-dihydrodibenzo[e,g]azulene-6,6(7H)-dicarboxylate (**26**):<sup>[6]</sup>

Pale yellow oil; Eluent: petroleum ether/ethyl acetate 25:1; 41.81 mg, 41%;

$^1\text{H}$  NMR (400 MHz, Chloroform-*d*)  $\delta$  7.45 - 7.36 (m, 2H), 7.32 - 7.17 (m, 5H), 7.12 (d,  $J = 7.1$  Hz, 1H), 5.62 (d,  $J = 2.8$  Hz, 1H), 3.77 - 3.69 (m, 4H), 3.58 (s, 3H), 2.98 (dd,  $J = 13.9, 6.1$  Hz, 1H), 2.71 (dd,  $J = 12.5, 6.5$  Hz, 1H), 2.48 (dd,  $J = 13.9, 2.1$  Hz, 1H), 2.06 (dd,  $J = 12.5, 10.3$  Hz, 1H);  $^{13}\text{C}$  NMR (101 MHz, Chloroform-*d*)  $\delta$  171.49, 171.16, 151.71, 141.09, 139.82, 136.23, 135.95, 130.46, 130.19, 128.87, 128.76, 127.59, 127.43, 127.25, 127.17, 125.38, 65.24, 54.03, 52.91, 52.68, 37.73, 35.28;

HRMS (ESI-TOF) Calcd for Chemical Formula:  $C_{22}H_{20}O_4Na$   $[M+Na]^+$ : 371.1254; found: 371.1266.

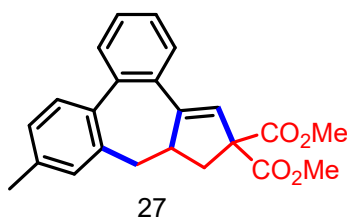

dimethyl 10-methyl-7a,8-dihydrodibenzo[*e,g*]azulene-6,6(7*H*)-dicarboxylate (**27**):

Pale yellow oil; Eluent: petroleum ether/ethyl acetate 25:1; 28.38 mg, 25%;

$^1H$  NMR (400 MHz, Chloroform-*d*)  $\delta$  7.45 - 7.37 (m,  $J$  = 8.3, 7.7, 2.1 Hz, 2H), 7.34 - 7.27 (m, 2H), 7.20 (d,  $J$  = 7.7 Hz, 1H), 7.11 (d,  $J$  = 9.6 Hz, 1H), 6.98 (d,  $J$  = 2.2 Hz, 1H), 5.67 (d,  $J$  = 2.8 Hz, 1H), 3.77 - 3.72 (m, 4H), 3.64 (s, 3H), 3.00 (dd,  $J$  = 13.9, 6.1 Hz, 1H), 2.74 (dd,  $J$  = 12.4, 6.5 Hz, 1H), 2.47 (d,  $J$  = 11.8 Hz, 1H), 2.36 (s, 3H), 2.11 (dd,  $J$  = 12.4, 10.4 Hz, 1H);  $^{13}C$  NMR (101 MHz, Chloroform-*d*)  $\delta$  171.53, 171.17, 151.94, 139.83, 138.19, 137.12, 136.09, 135.86, 131.25, 130.08, 128.82, 128.72, 127.94, 127.32, 127.20, 125.22, 65.23, 53.88, 52.90, 52.66, 37.91, 35.26, 21.21; HRMS (ESI-TOF) Calcd for Chemical Formula:  $C_{23}H_{22}O_4Na$   $[M+Na]^+$ : 385.141; found: 385.1429.

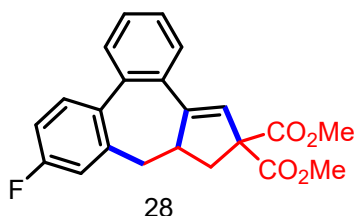

dimethyl 10-fluoro-7a,8-dihydrodibenzo[*e,g*]azulene-6,6(7*H*)-dicarboxylate (**28**):

Pale yellow oil; Eluent: petroleum ether/ethyl acetate 25:1; 38.47 mg, 35%;

$^1H$  NMR (400 MHz, Chloroform-*d*)  $\delta$  7.41 (dd,  $J$  = 6.4, 1.5 Hz, 2H), 7.36 - 7.22 (m, 3H), 6.99 (td,  $J$  = 8.5, 2.7 Hz, 1H), 6.90 (dd,  $J$  = 9.1, 2.7 Hz, 1H), 5.68 (d,  $J$  = 2.8 Hz, 1H), 3.81 - 3.72 (m, 4H), 3.64 (s, 3H), 3.00 (dd,  $J$  = 13.9, 6.2 Hz, 1H), 2.77 (dd,  $J$  = 12.5, 6.6 Hz, 1H), 2.49 (dd,  $J$  = 13.9, 2.1 Hz, 1H), 2.07 (dd,  $J$  = 12.5, 10.3 Hz, 1H);  $^{13}C$  NMR (101 MHz, Chloroform-*d*)  $\delta$  171.39, 171.01, 161.97 (d,  $J$  = 247.5 Hz), 151.30, 138.88, 138.56 (d,  $J$  = 7.1 Hz), 137.11 (d,  $J$  = 3.0 Hz), 135.80, 131.74 (d,  $J$  = 8.1 Hz), 128.83, 128.80, 127.68, 127.27, 125.63, 117.15 (d,  $J$  = 21.2 Hz), 113.92 (d,  $J$

= 21.2 Hz), 65.21, 53.77, 52.94, 52.73, 37.77, 35.34;  $^{19}\text{F}$  NMR (376 MHz, Chloroform-*d*)  $\delta$  -115.78; HRMS (ESI-TOF) Calcd for Chemical Formula:  $\text{C}_{22}\text{H}_{19}\text{FO}_4\text{Na}$   $[\text{M}+\text{Na}]^+$ : 389.1116; found: 389.1190.

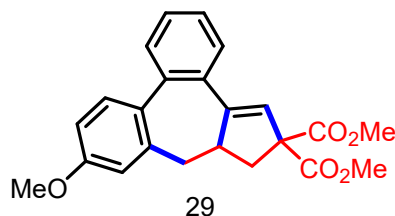

dimethyl 10-methoxy-7*a*,8-dihydrodibenzo[*e,g*]azulene-6,6(7*H*)-dicarboxylate (**29**):

Pale yellow oil; Eluent: petroleum ether/ethyl acetate 25:1; 45.41 mg, 40%;

$^1\text{H}$  NMR (400 MHz, Chloroform-*d*)  $\delta$  7.41 - 7.33 (m, 2H), 7.29 - 7.22 (m, 2H), 7.19 (d,  $J$  = 8.4 Hz, 1H), 6.80 (dd,  $J$  = 8.4, 2.7 Hz, 1H), 6.69 (d,  $J$  = 2.7 Hz, 1H), 5.64 (d,  $J$  = 2.8 Hz, 1H), 3.80 (s, 3H), 3.74 - 3.68 (m, 4H), 3.61 (s, 3H), 2.98 (dd,  $J$  = 13.9, 6.2 Hz, 1H), 2.71 (dd,  $J$  = 12.4, 6.4 Hz, 1H), 2.44 (dd,  $J$  = 13.9, 2.1 Hz, 1H), 2.07 (dd,  $J$  = 12.4, 10.4 Hz, 1H);  $^{13}\text{C}$  NMR (101 MHz, Chloroform-*d*)  $\delta$  171.47, 171.10, 158.87, 151.87, 139.58, 137.73, 135.74, 133.67, 131.31, 128.72, 128.69, 127.20, 127.09, 125.20, 116.33, 111.98, 65.18, 55.40, 53.66, 52.90, 52.67, 38.00, 35.58; HRMS (ESI-TOF) Calcd for Chemical Formula:  $\text{C}_{23}\text{H}_{22}\text{O}_5\text{Na}$   $[\text{M}+\text{Na}]^+$ : 401.1359; found: 401.1373.

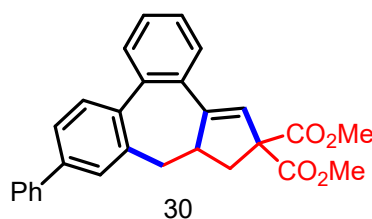

dimethyl 10-phenyl-7*a*,8-dihydrodibenzo[*e,g*]azulene-6,6(7*H*)-dicarboxylate (**30**):

Pale yellow oil; Eluent: petroleum ether/ethyl acetate 25:1; 19.10 mg, 15%;

$^1\text{H}$  NMR (400 MHz, Chloroform-*d*)  $\delta$  7.65 (dd,  $J$  = 7.1, 1.4 Hz, 2H), 7.55 (dd,  $J$  = 8.0, 2.0 Hz, 1H), 7.52 - 7.42 (m, 4H), 7.42 - 7.30 (m, 5H), 5.71 (d,  $J$  = 2.8 Hz, 1H), 3.86 - 3.73 (m, 4H), 3.60 (s, 3H), 3.09 (dd,  $J$  = 13.9, 6.1 Hz, 1H), 2.78 (dd,  $J$  = 12.4, 6.5 Hz, 1H), 2.61 (dd,  $J$  = 13.9, 2.1 Hz, 1H), 2.14 (dd,  $J$  = 12.5, 10.3 Hz, 1H);  $^{13}\text{C}$  NMR (101 MHz, Chloroform-*d*)  $\delta$  171.42, 171.10, 151.66, 140.85, 140.19, 139.48, 136.75, 135.98, 130.69, 129.10, 128.94, 128.89, 128.81, 127.67, 127.48, 127.30, 127.25,

125.91, 125.54, 65.26, 53.93, 52.92, 52.69, 37.89, 35.59; HRMS (ESI-TOF) Calcd for Chemical Formula: C<sub>28</sub>H<sub>24</sub>O<sub>4</sub>Na [M+Na]<sup>+</sup>: 447.1567; found: 447.1586.

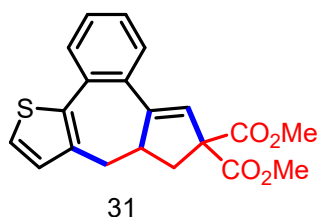

dimethyl 8*a*,9-dihydrobenzo[7,8]azuleno[6,5-*b*]thiophene-10,10(8*H*)-dicarboxylate ( **31**):

Pale yellow oil; Eluent: petroleum ether/ethyl acetate 25:1; 29.77 mg, 28%;

<sup>1</sup>H NMR (400 MHz, Chloroform-*d*) δ 7.60 (dd, *J* = 7.8, 1.3 Hz, 1H), 7.54 (dd, *J* = 7.7, 1.3 Hz, 1H), 7.31 (td, *J* = 7.6, 1.5 Hz, 1H), 7.22 (td, *J* = 7.5, 1.3 Hz, 1H), 7.16 (d, *J* = 5.1 Hz, 1H), 6.86 (d, *J* = 5.1 Hz, 1H), 5.99 (d, *J* = 2.1 Hz, 1H), 3.76 (s, 3H), 3.72 (s, 3H), 3.58 - 3.44 (m, 1H), 3.01 (dd, *J* = 15.1, 4.6 Hz, 1H), 2.84 (dd, *J* = 12.9, 7.3 Hz, 1H), 2.73 (dd, *J* = 15.1, 7.5 Hz, 1H), 2.28 (dd, *J* = 12.9, 7.5 Hz, 1H); <sup>13</sup>C NMR (101 MHz, Chloroform-*d*) δ 171.53, 171.34, 152.09, 138.63, 137.62, 133.45, 132.83, 131.06, 128.98, 128.83, 127.15, 125.44, 123.86, 64.77, 53.01, 52.91, 49.54, 39.88, 33.31; HRMS (ESI-TOF) Calcd for Chemical Formula: C<sub>20</sub>H<sub>18</sub>O<sub>4</sub>Na [M+Na]<sup>+</sup>: 377.0818; found: 377.0887.

## 8、Reference

- [1] Yu, C. , Huang, R. & Patureau, F. W. Direct dehydrogenative access to unsymmetrical phenones. *Angew. Chem. Int. Ed.* 2022, 61, e202201142.
- [2] Guan, Zhipeng., et al. Synthesis of Cyclopentene Derivatives via Electrochemically Induced Intermolecular Selective (3+2) Annulation. *Angew. Chem. Int. Ed.* 2022, 61, e202207059.
- [3] Zhang, M.-J., Ding, X., Lu, A.-D., Kang, J., Gao, Y.-Y., Wang, Z.-W., Li, H.-Y. & Wang, Q.-M. Generation and precise control of sulfonyl radicals: visible-light-activated redox-neutral formation of sulfonates and sulfonamides. *Org. Chem. Front.* 2021, **8**, 961-967.
- [4] Guo, H.-Y., Zhang, S., Feng, X.-J., Yu, X.-Q., Yamamoto, Y. & Bao, M. Palladium-catalyzed cycloisomerization of 2-ethynylbiaryls to 9-methyldiene fluorenes. *Org. Lett.* 2022, **24**, 2596-2600.
- [5] Kejani, A. A., Khosravi, H., Rominger, F., Balalaie, S. & Breit, B. Metal-free domino oligocyclization reactions of enynals and enynones with molecular oxygen. *Org. Lett.* 2021, **23**, 1291-1295.
- [6] Kitagawa, O., Yamada, Y., Sugawara, A. & Taguchi, T. Radical cascade reaction with 1,4-dienes and 1,4-enynes using 2-(iodomethyl)cyclopropane-1,1-dicarboxylate

as a homoallyl radical precursor: One-step synthesis of bicyclo 3.3.0 octane derivatives. *Org. Lett.* 2002, **4**, 1011-1013.

## 9、NMR Spectra for Photocatalysis Products and 32、33'、28'、3'

dimethyl 3*a*-methyl-4-oxo-3*a*,4,11,11*a*-tetrahydro-1*H*-cyclopenta[4,5]pyrido[1,2-*a*]indole-2,2(3*H*)-dicarboxylate (**3**):

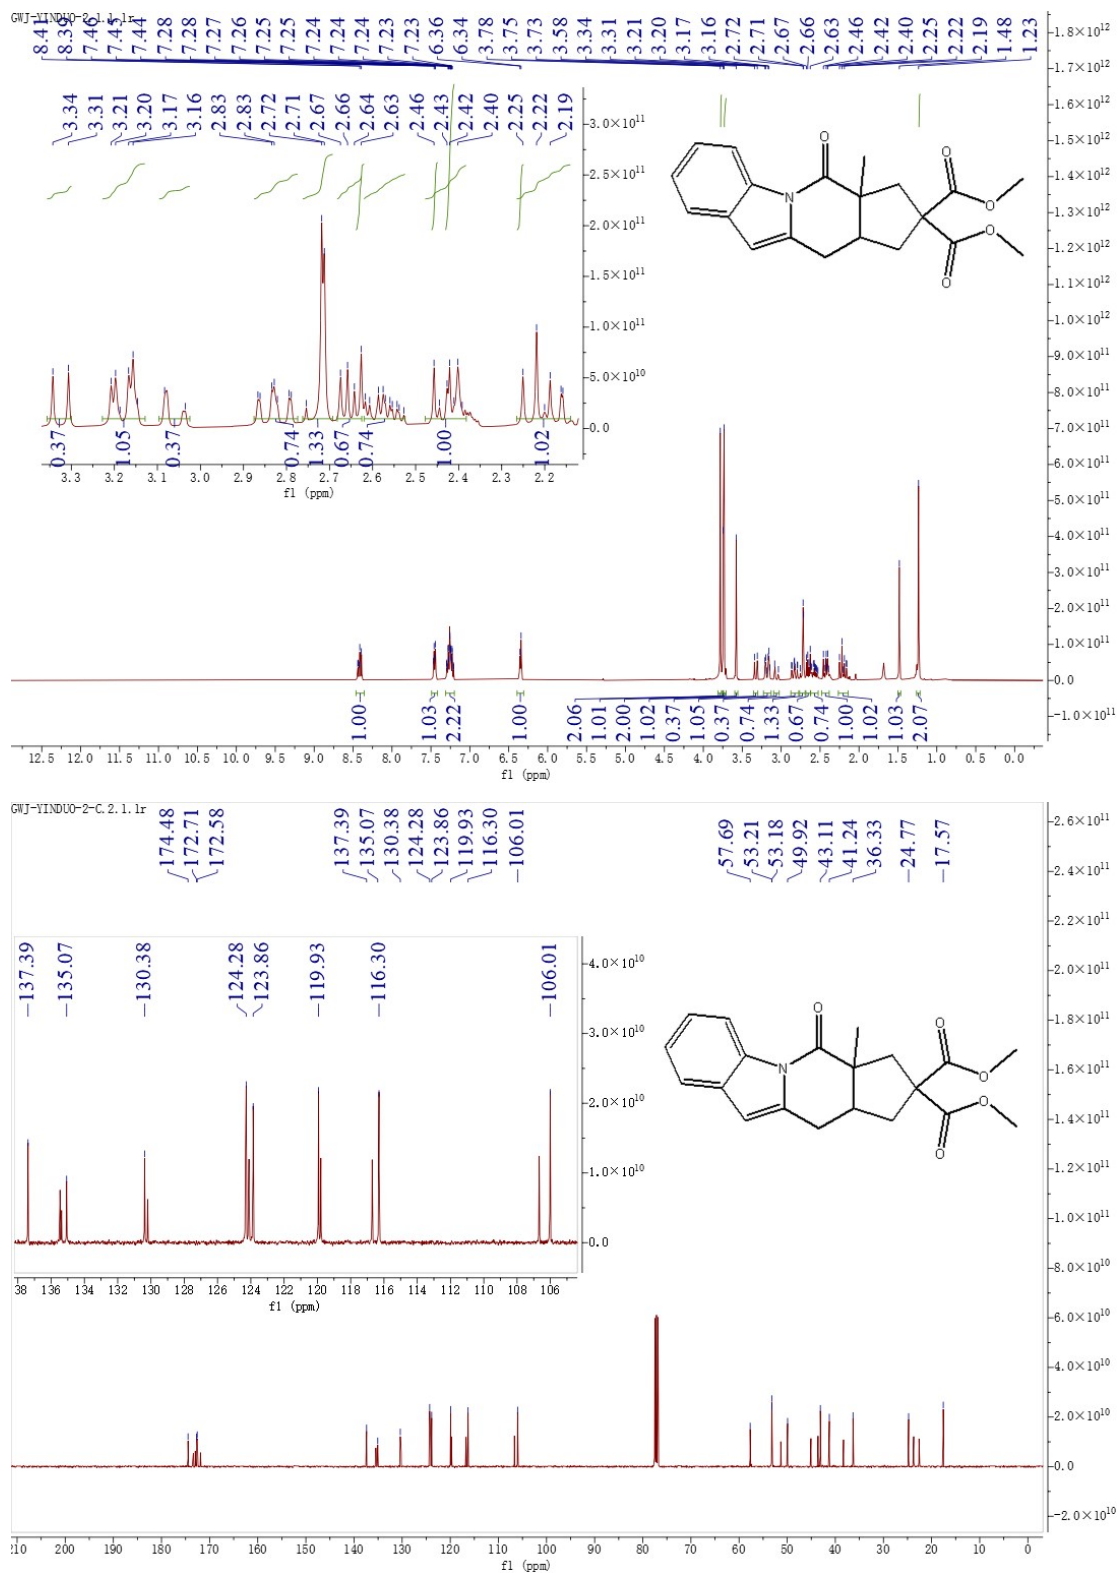

dimethyl 3*a*,8-dimethyl-4-oxo-3*a*,4,11,11*a*-tetrahydro-1*H*-cyclopenta[4,5]pyrido[1,2-*a*]indole-2,2(3*H*)-dicarboxylate (**4**):

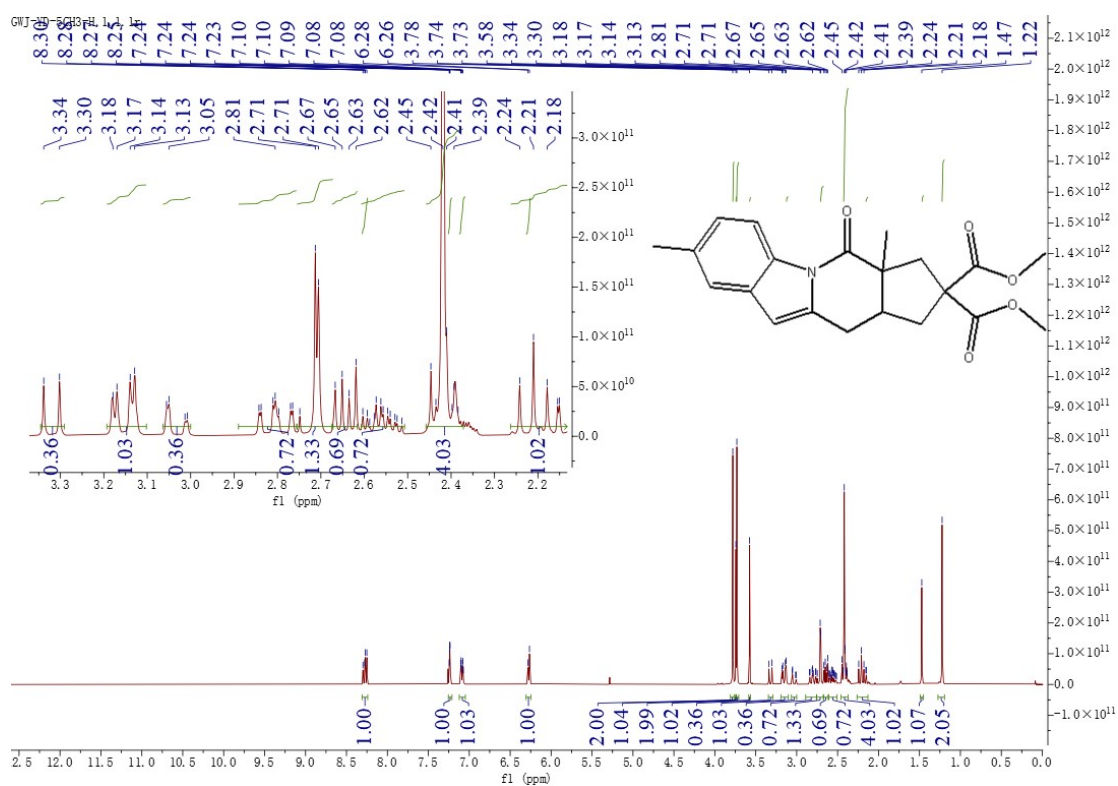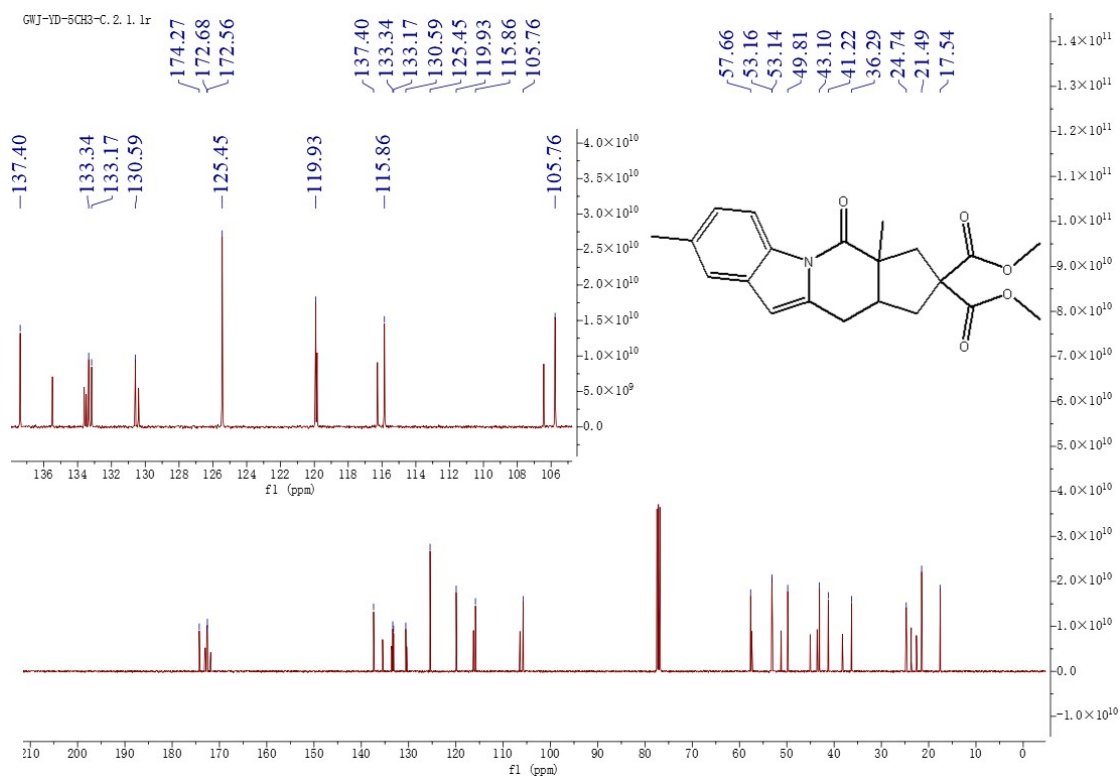

dimethyl 8-fluoro-3*a*-methyl-4-oxo-3*a*,4,11,11*a*-tetrahydro-1*H*-cyclopenta[4,5]pyrid-  
o[1,2-*a*]indole-2,2(3*H*)-dicarboxylate (**5**):

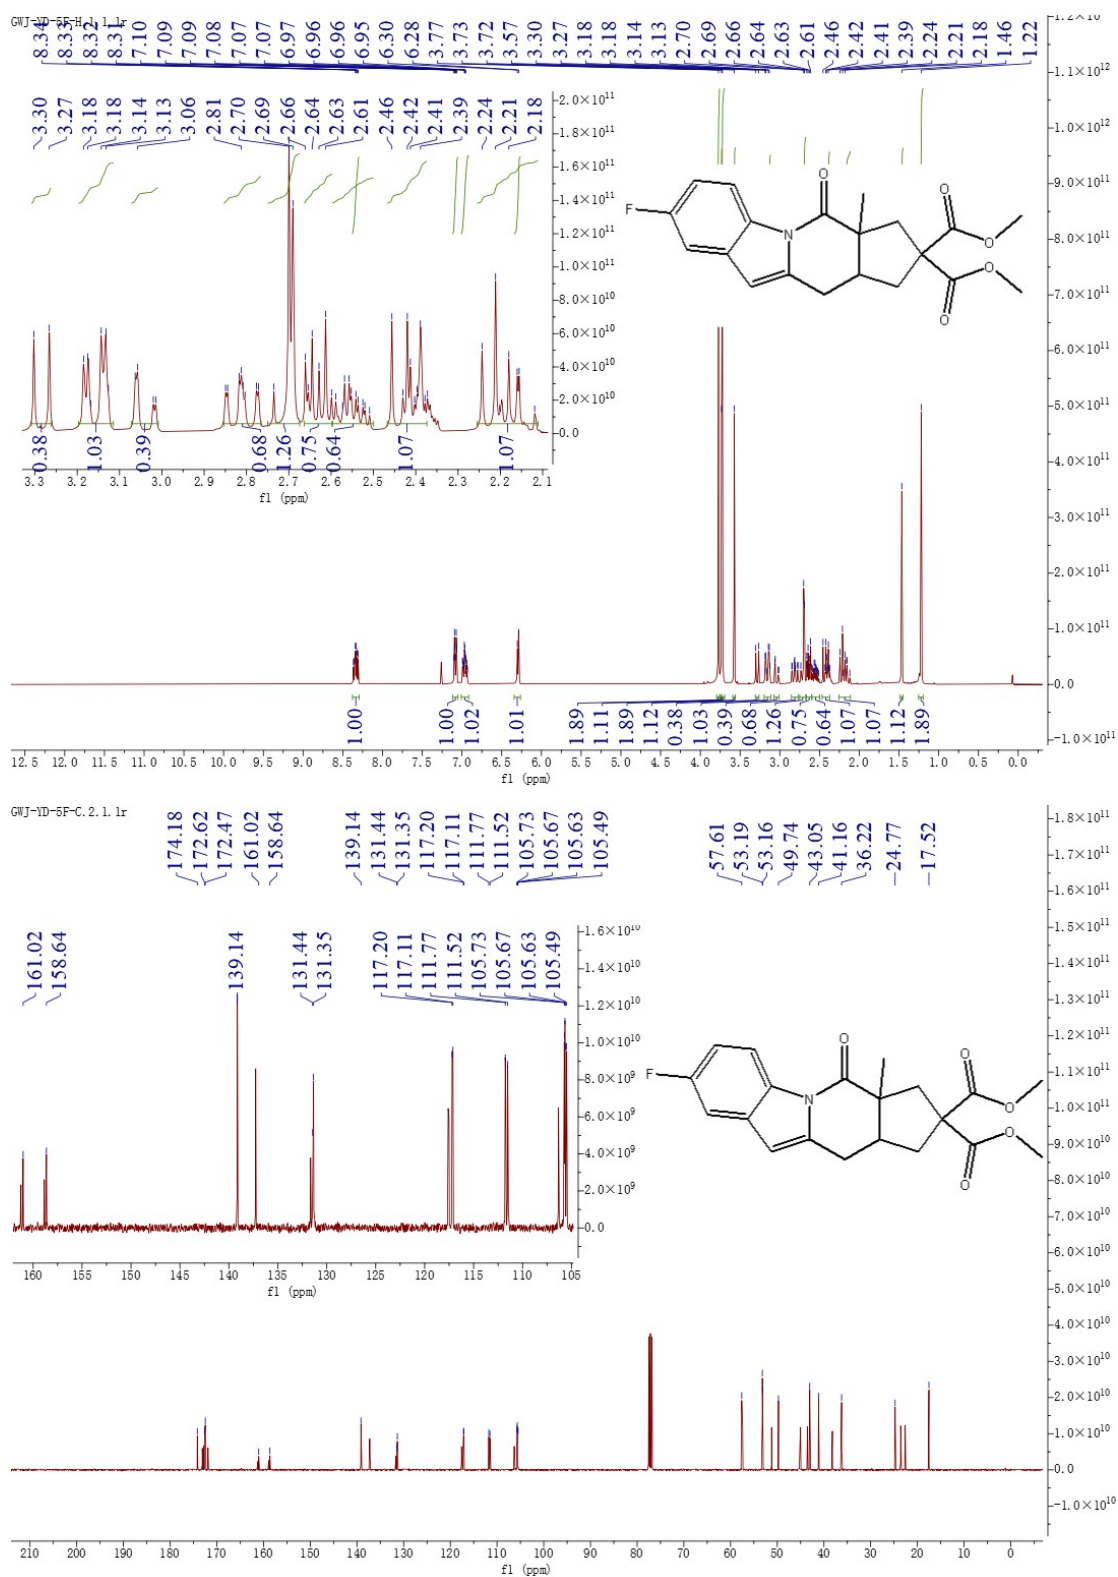

GWJ-YD-6F-F, 3, 1, 1r

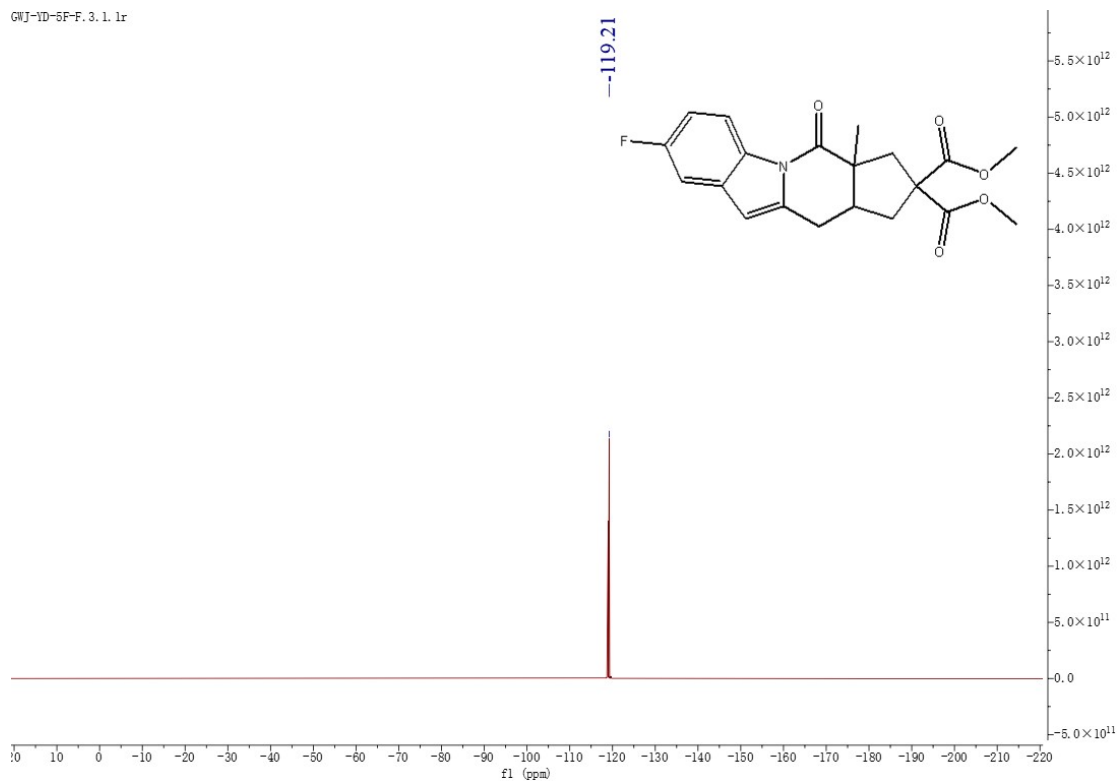

dimethyl 8-chloro-3*a*-methyl-4-oxo-3*a*,4,11,11*a*-tetrahydro-1*H*-cyclopenta[4,5]pyrid  
 -o[1,2-*a*]indole-2,2(3*H*)-dicarboxylate (6):

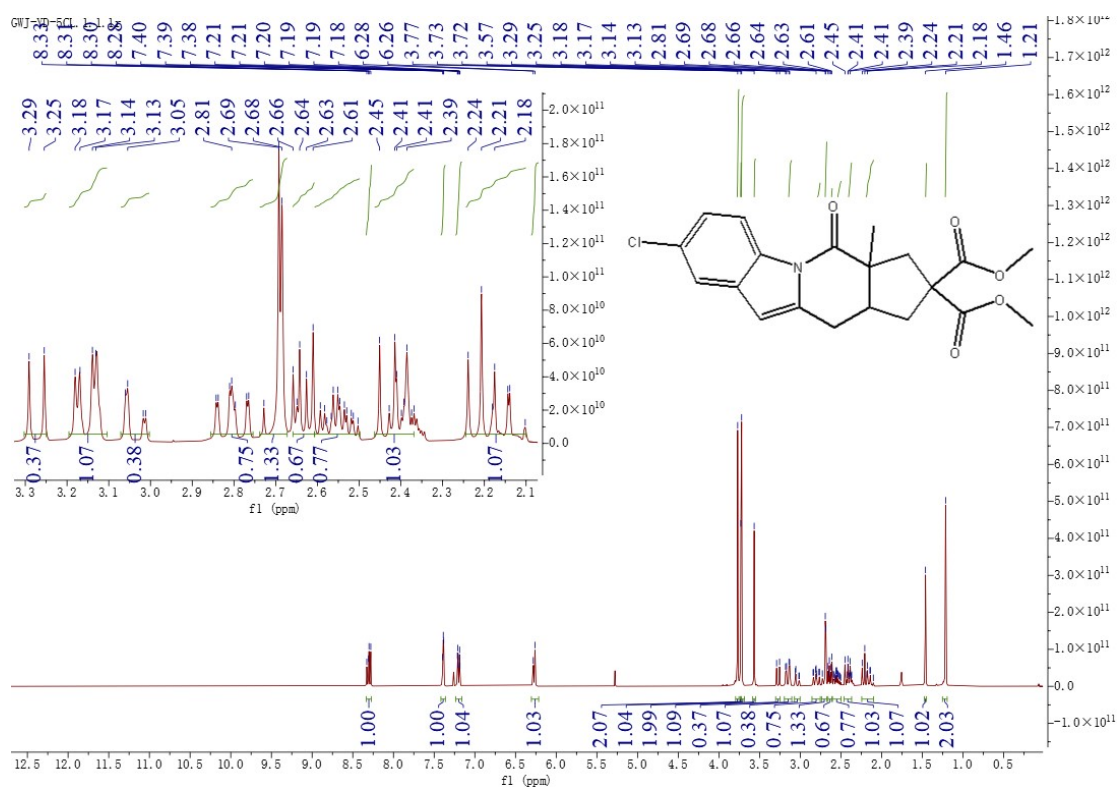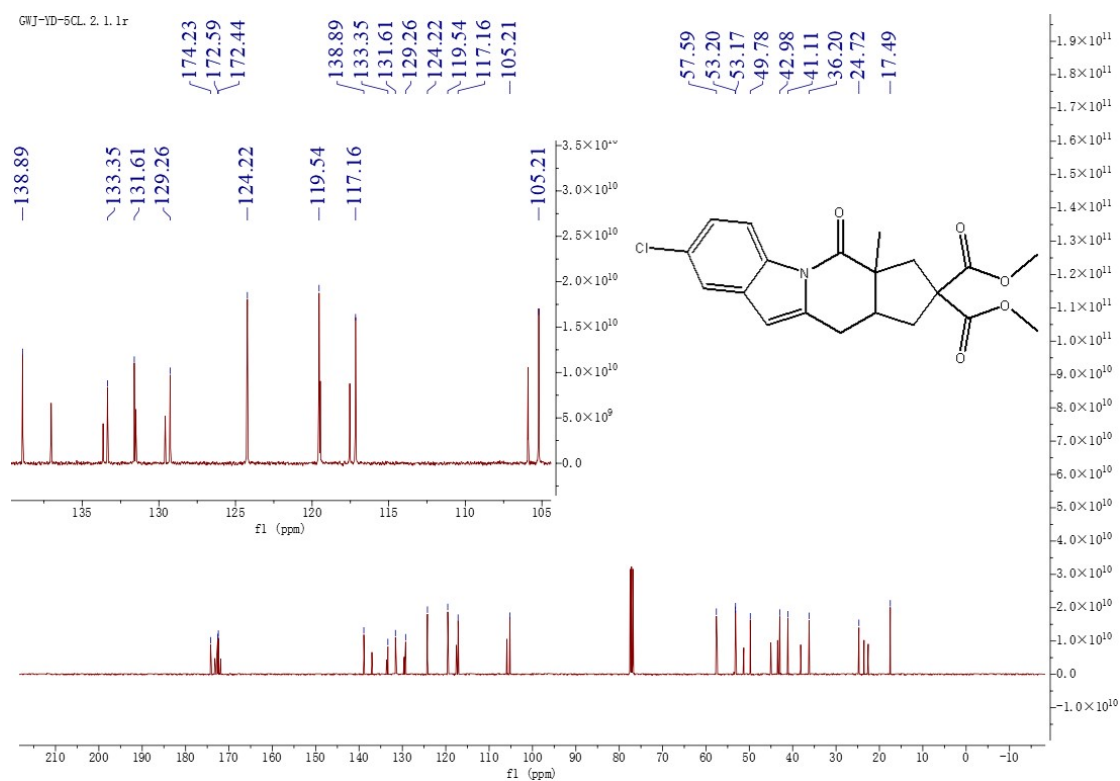

dimethyl 8-bromo-3*a*-methyl-4-oxo-3*a*,4,11,11*a*-tetrahydro-1*H*-cyclopenta[4,5]pyrid  
 -o[1,2-*a*]indole-2,2(3*H*)-dicarboxylate (7):

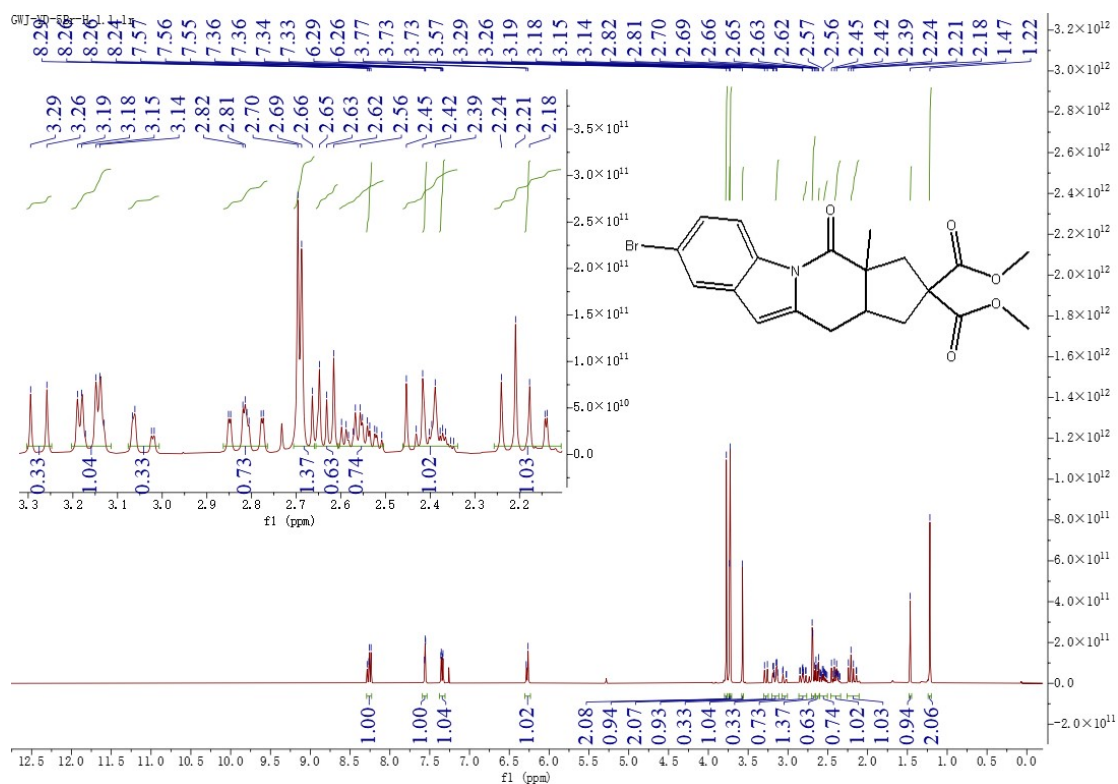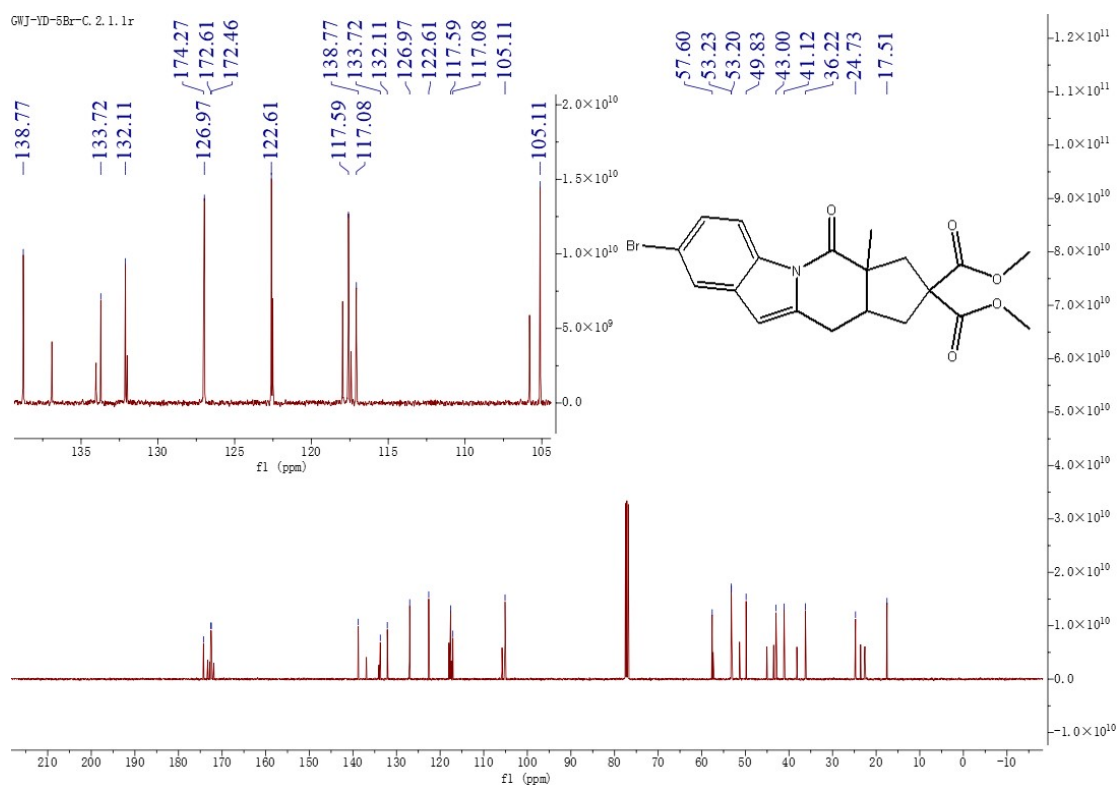

dimethyl 8-iodo-3*a*-methyl-4-oxo-3*a*,4,11,11*a*-tetrahydro-1*H*-cyclopenta[4,5]pyrido[1,2-*a*]indole-2,2(3*H*)-dicarboxylate (**8**):

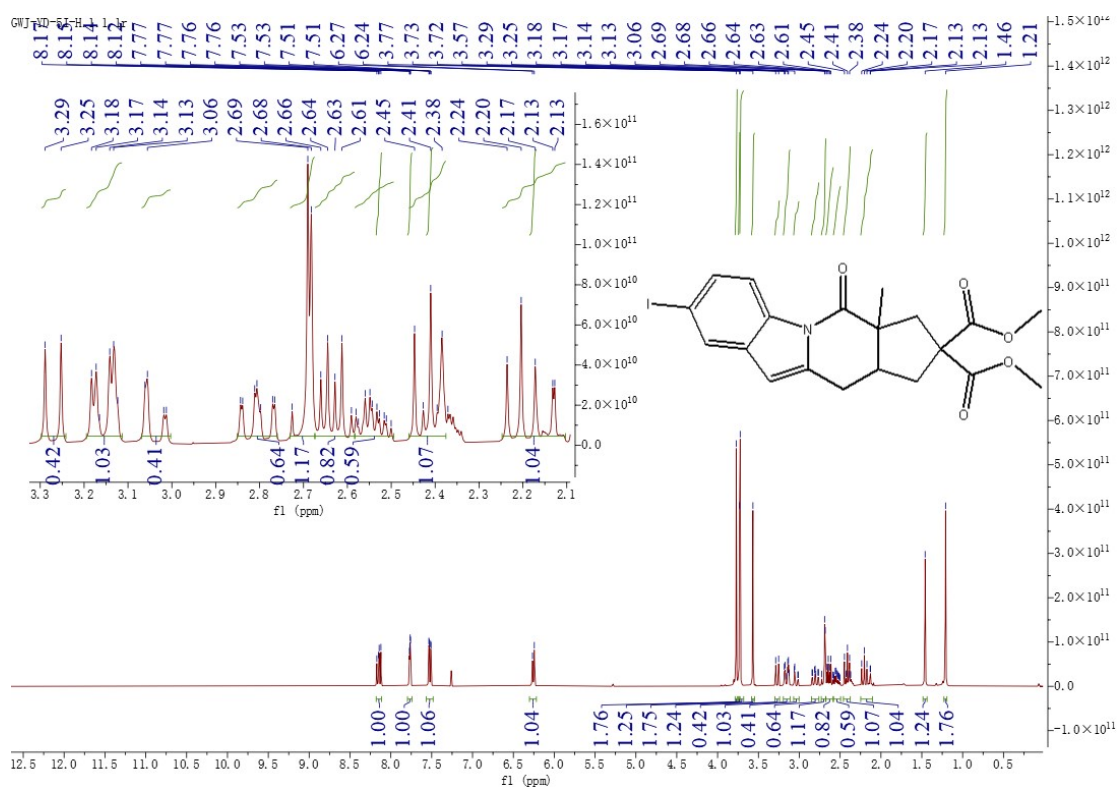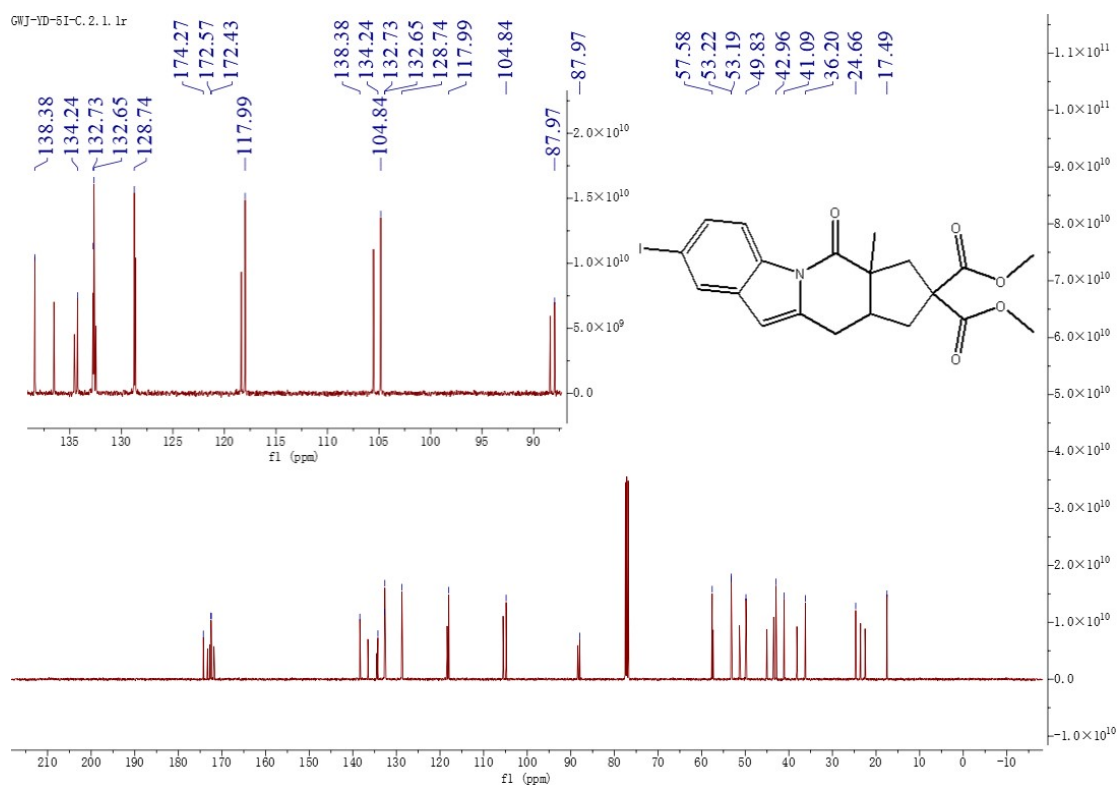

dimethyl 8-methoxy-3*a*-methyl-4-oxo-3*a*,4,11,11*a*-tetrahydro-1*H*-cyclopenta[4,5]pyr-  
-ido[1,2-*a*]indole-2,2(3*H*)-dicarboxylate (**9**):

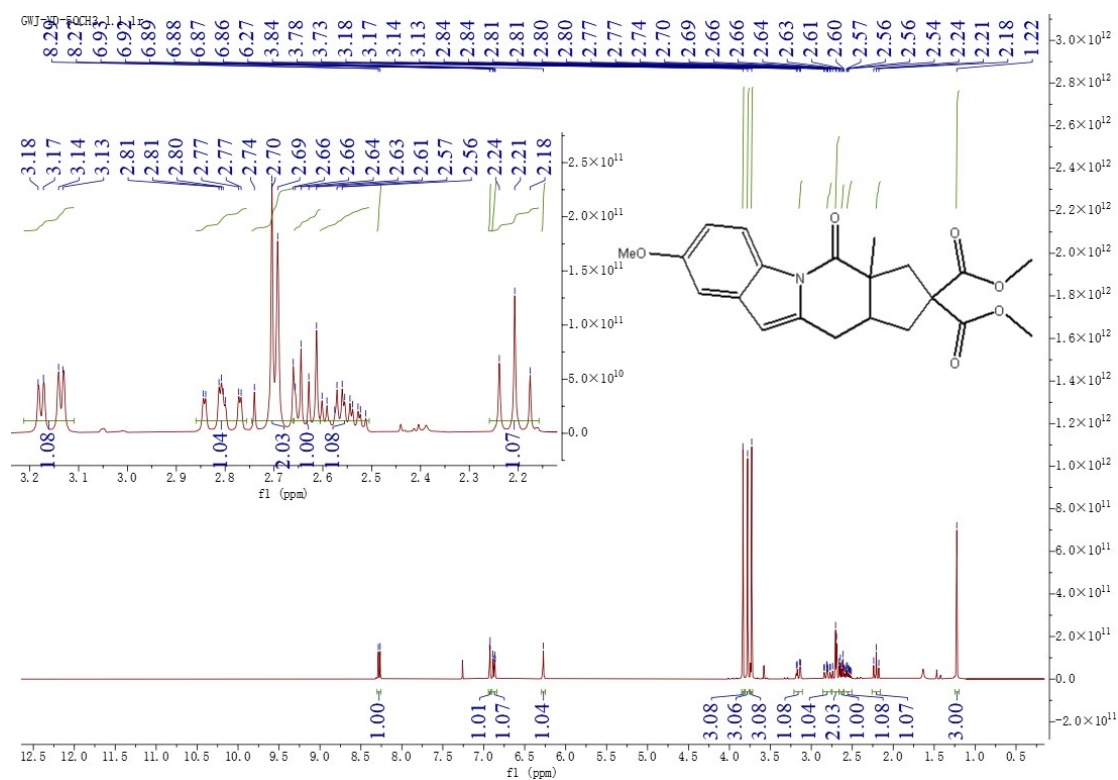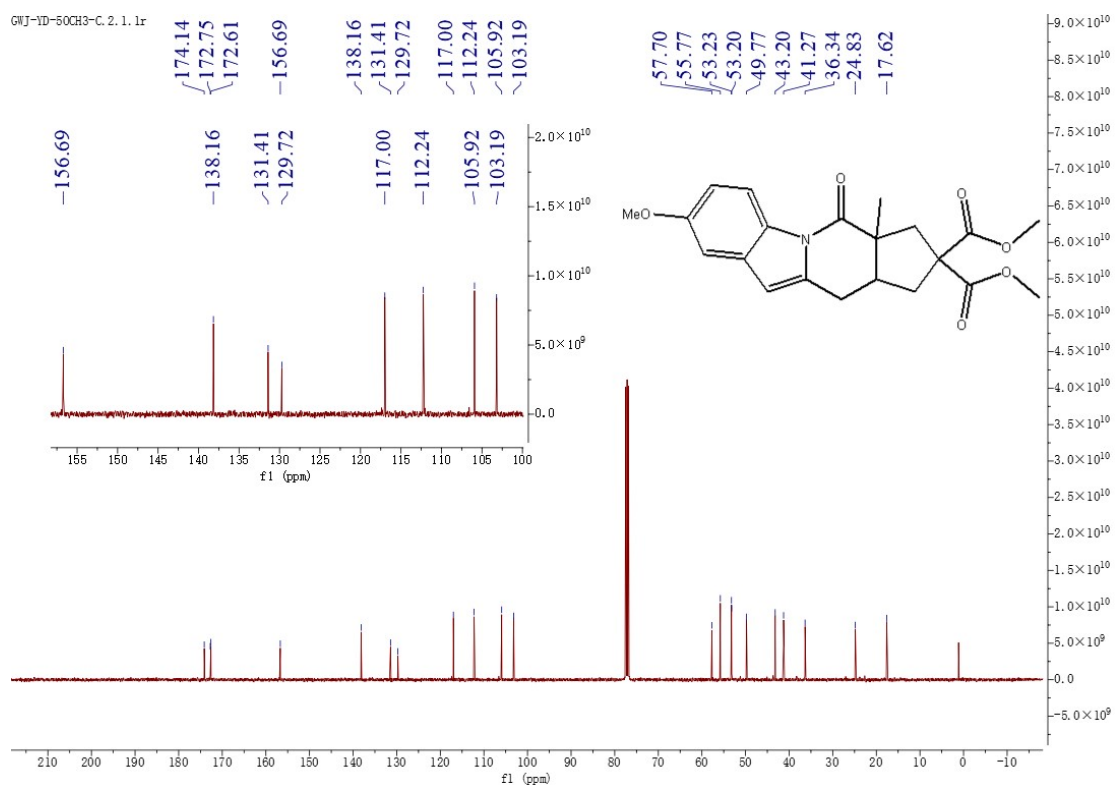

dimethyl 8-(benzyloxy)-3a-methyl-4-oxo-3a,4,11,11a-tetrahydro-1H-cyclopenta[4,5]pyrido[1,2-a]indole-2,2(3H)-dicarboxylate (**10**):

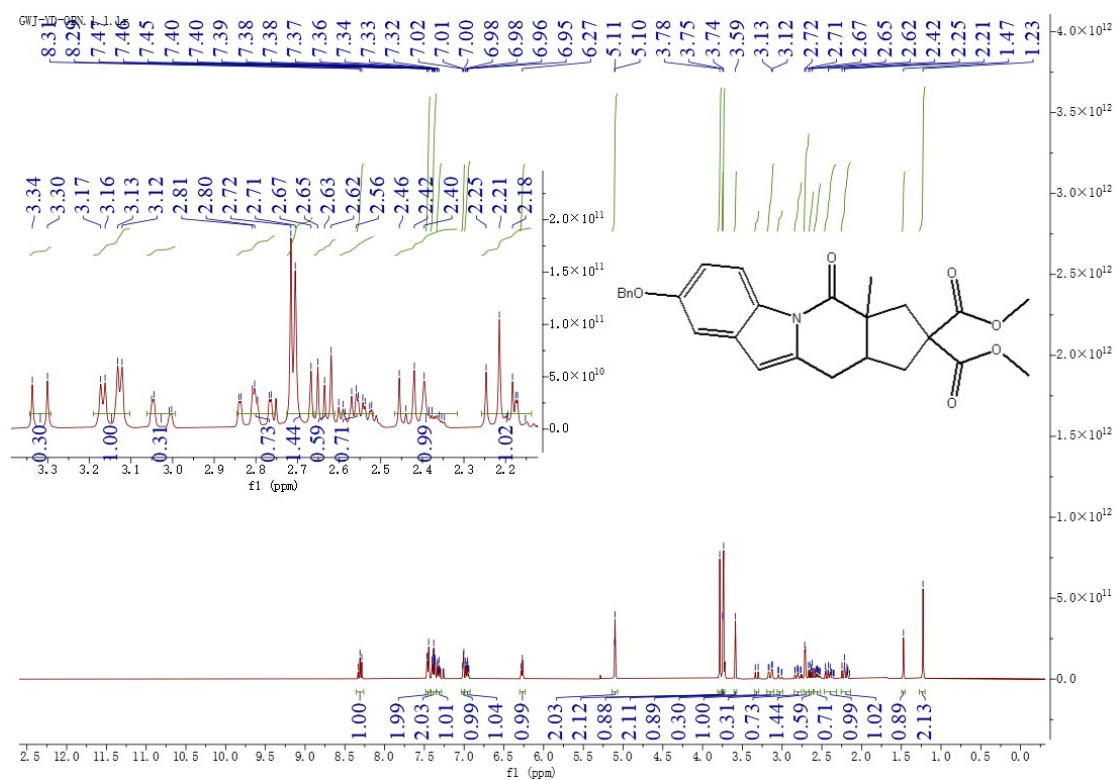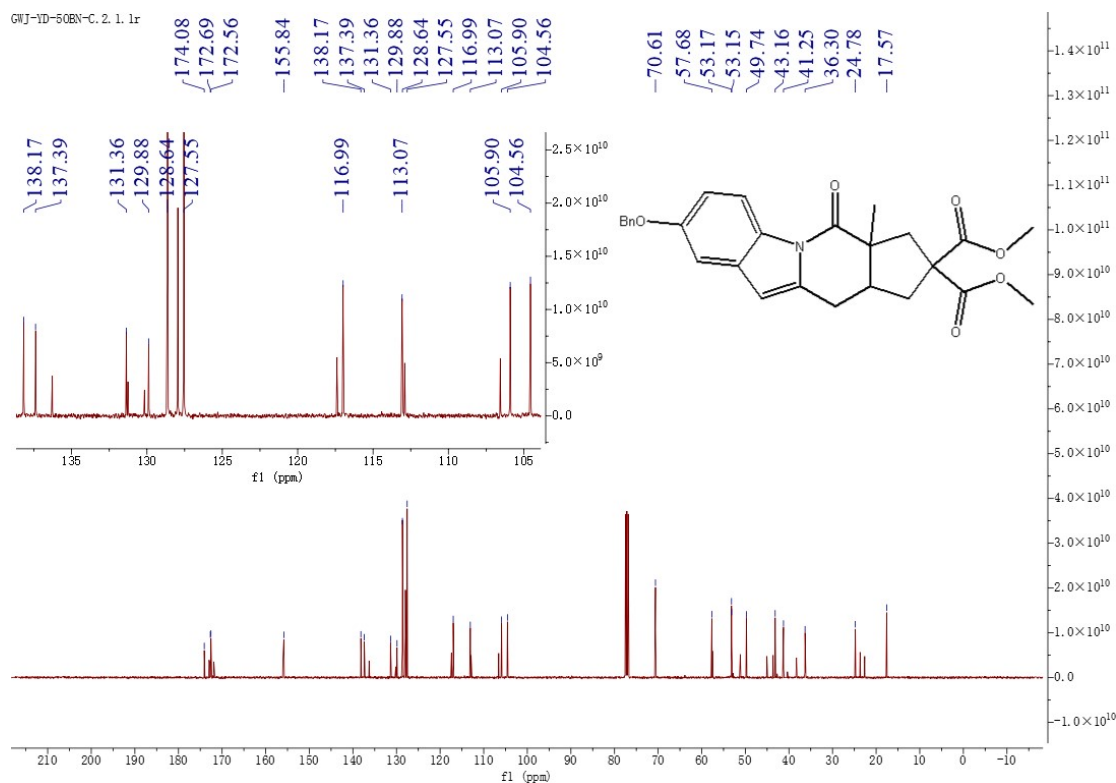

dimethyl 3*a*-methyl-4-oxo-8-(trifluoromethyl)-3*a*,4,11,11*a*-tetrahydro-1*H*-cyclopenta  
[4,5]pyrido[1,2-*a*]indole-2,2(3*H*)-dicarboxylate (**11**):

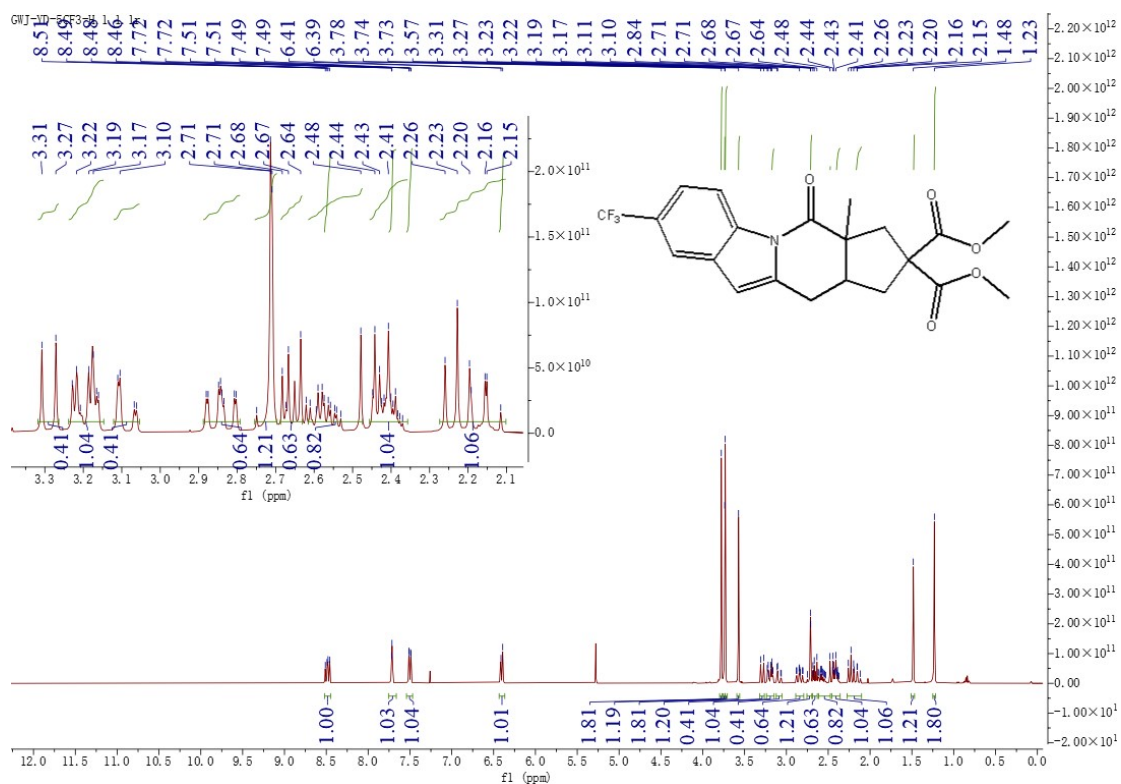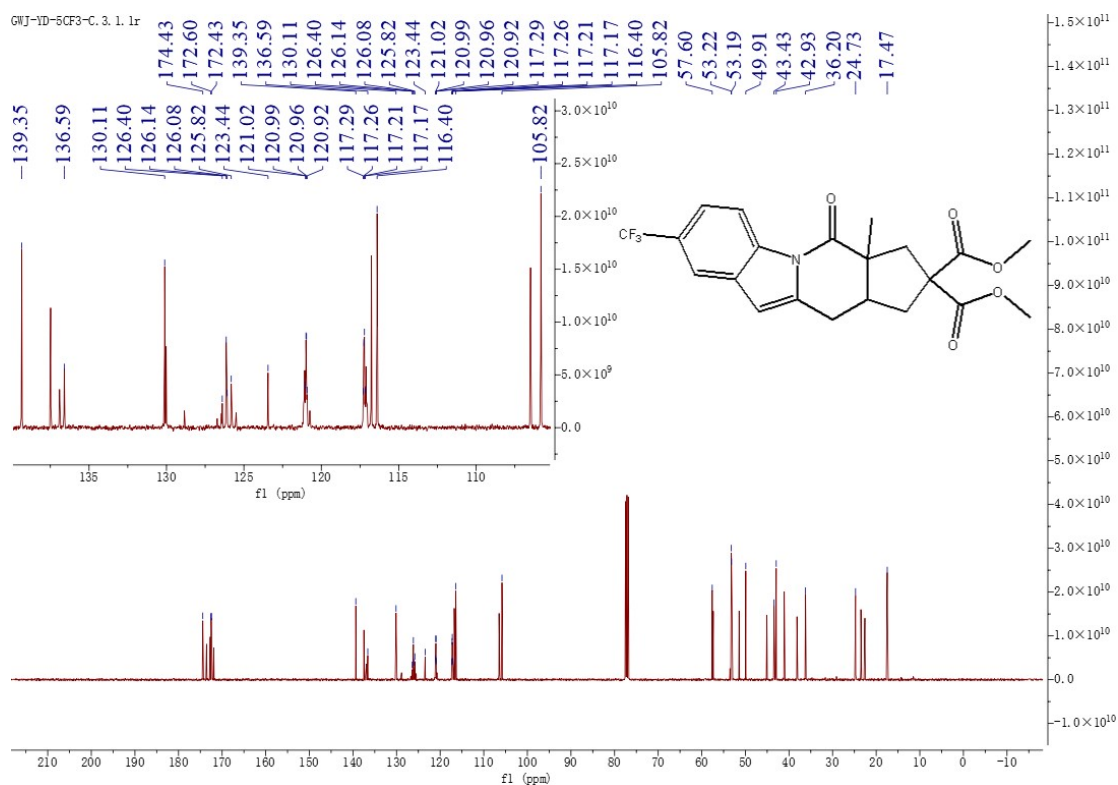

GWJ-1D-5CF3-F. 3. 1. 1r

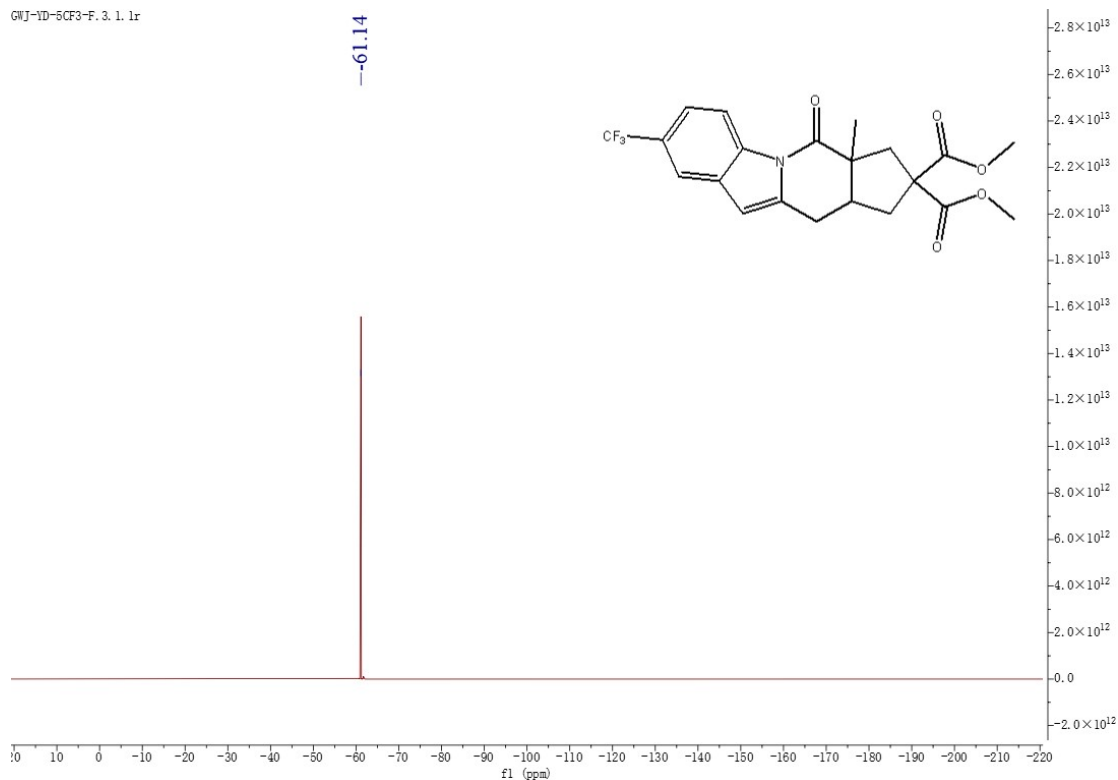

dimethyl 8-cyano-3*a*-methyl-4-oxo-3*a*,4,11,11*a*-tetrahydro-1*H*-cyclopenta[4,5]pyrid-  
o[1,2-*a*]indole-2,2(3*H*)-dicarboxylate (**12**):

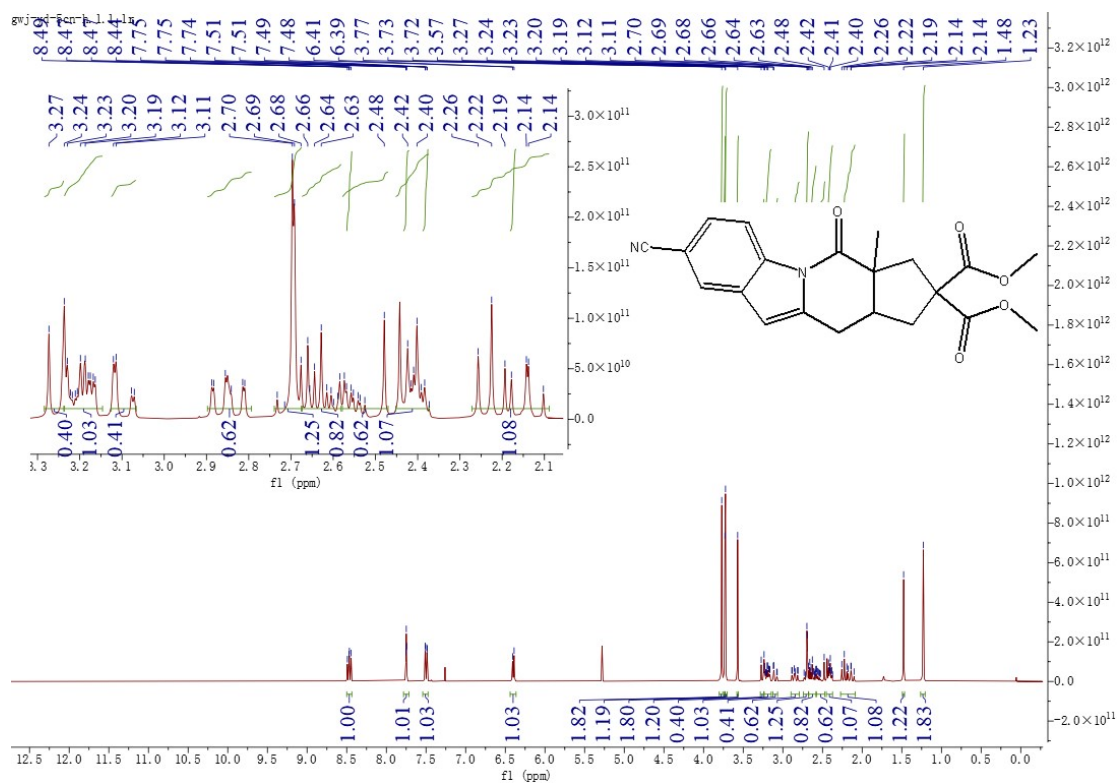





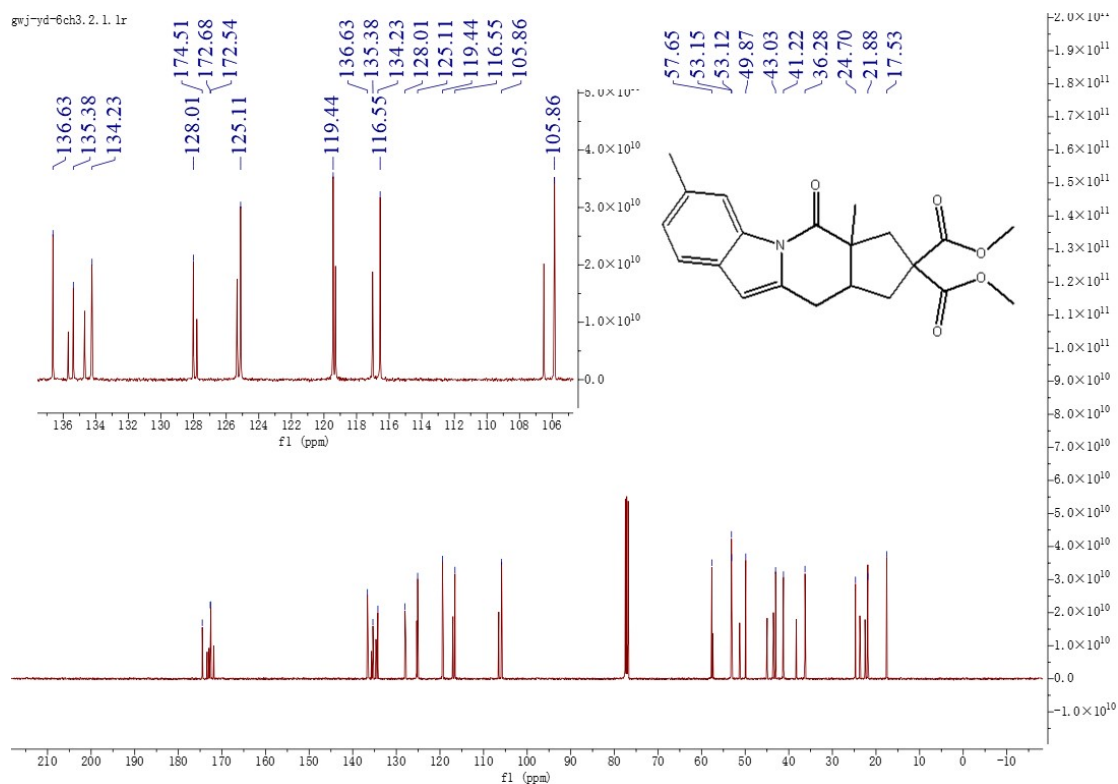

dimethyl 3*a*,9-dimethyl-4-oxo-3*a*,4,11,11*a*-tetrahydro-1*H*-cyclopenta[4,5]pyrido[1,2-*a*]indole-2,2(3*H*)-dicarboxylate (**15**):

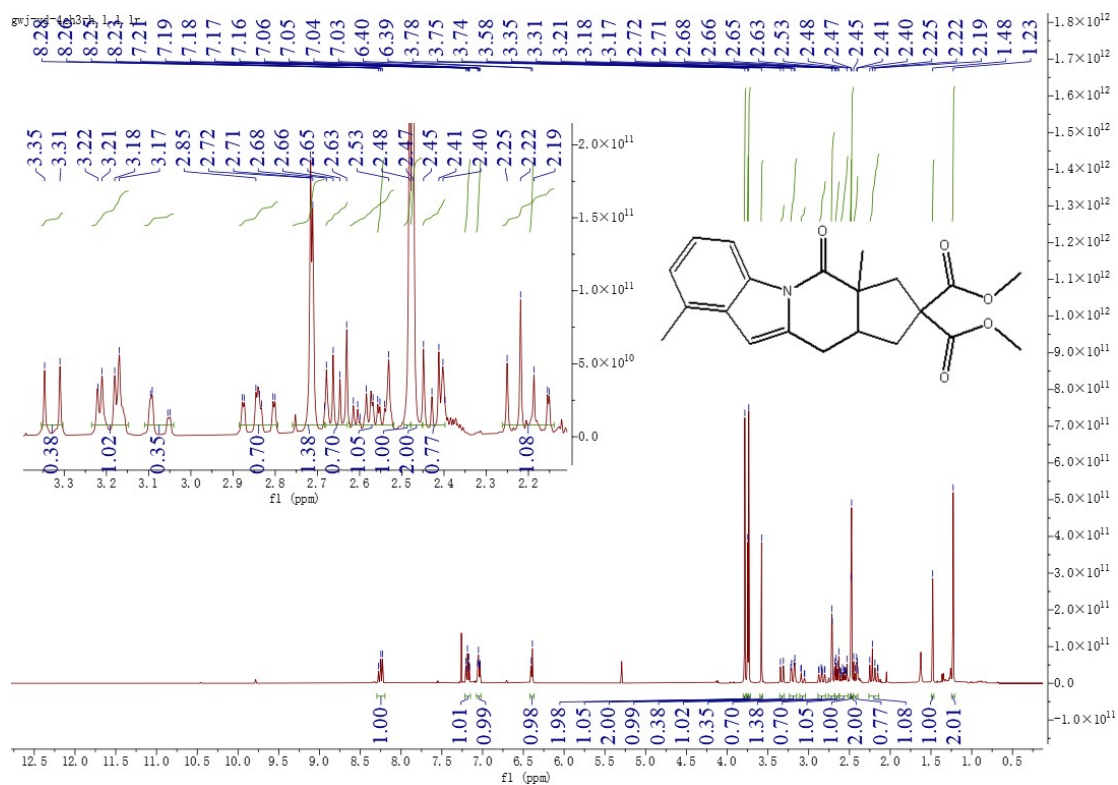



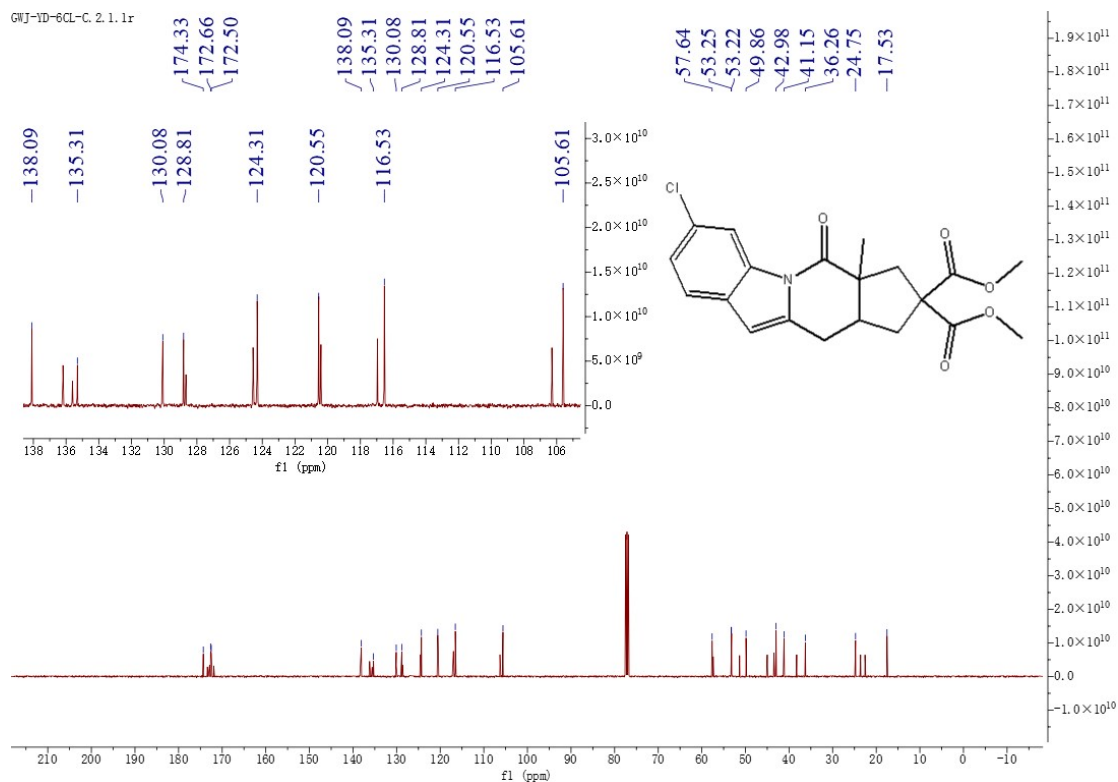

dimethyl 7-bromo-3a-methyl-4-oxo-3a,4,11,11a-tetrahydro-1H-cyclopenta[4,5]pyridine-2,2(3H)-dicarboxylate (17):

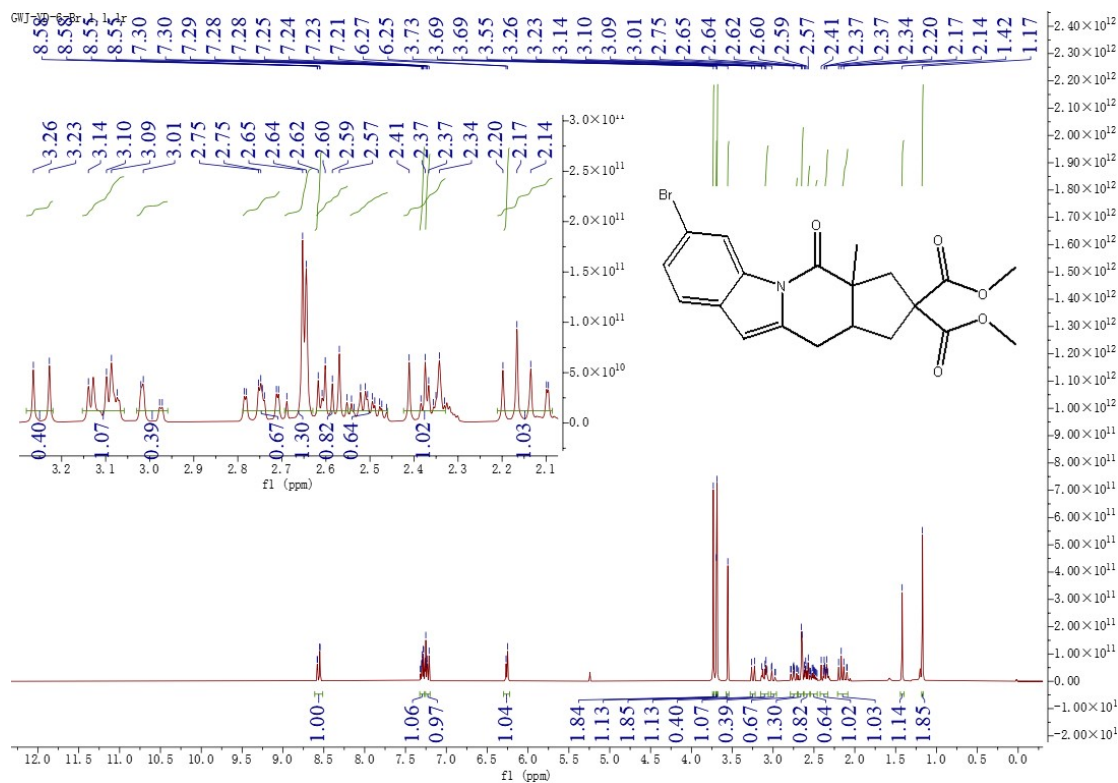

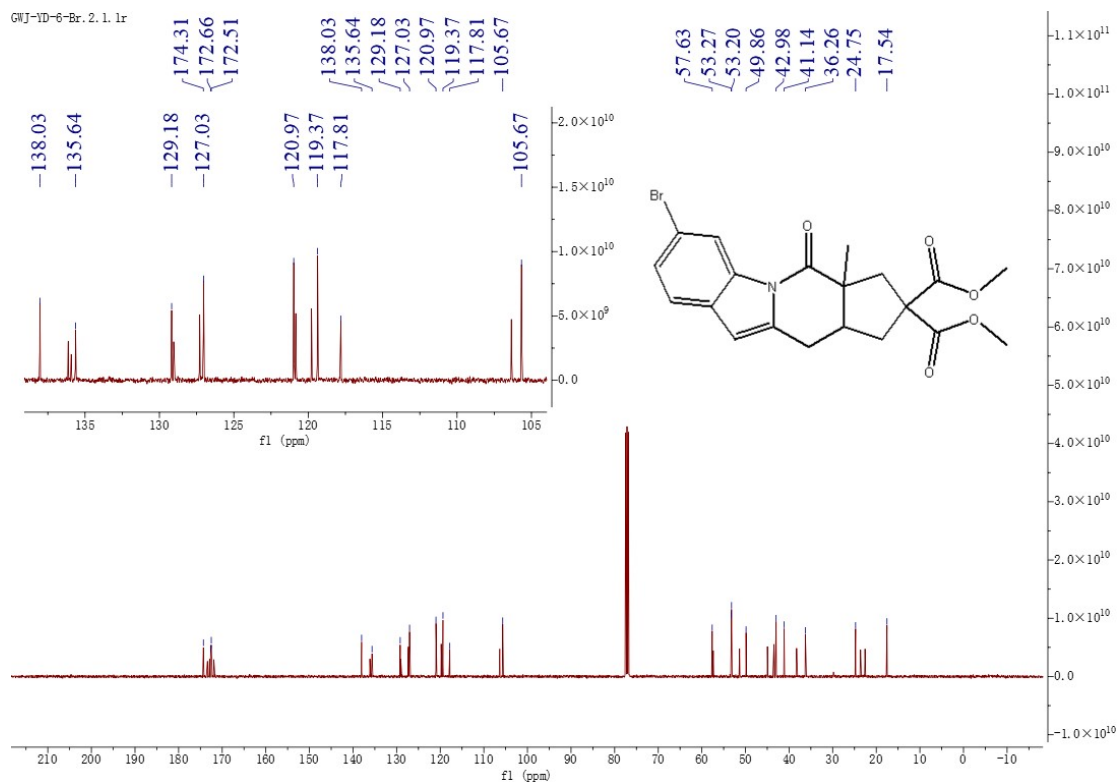

dimethyl 9-fluoro-3a-methyl-4-oxo-3a,4,11,11a-tetrahydro-1H-cyclopenta[4,5]pyrid-  
o[1,2-a]indole-2,2(3H)-dicarboxylate (18):

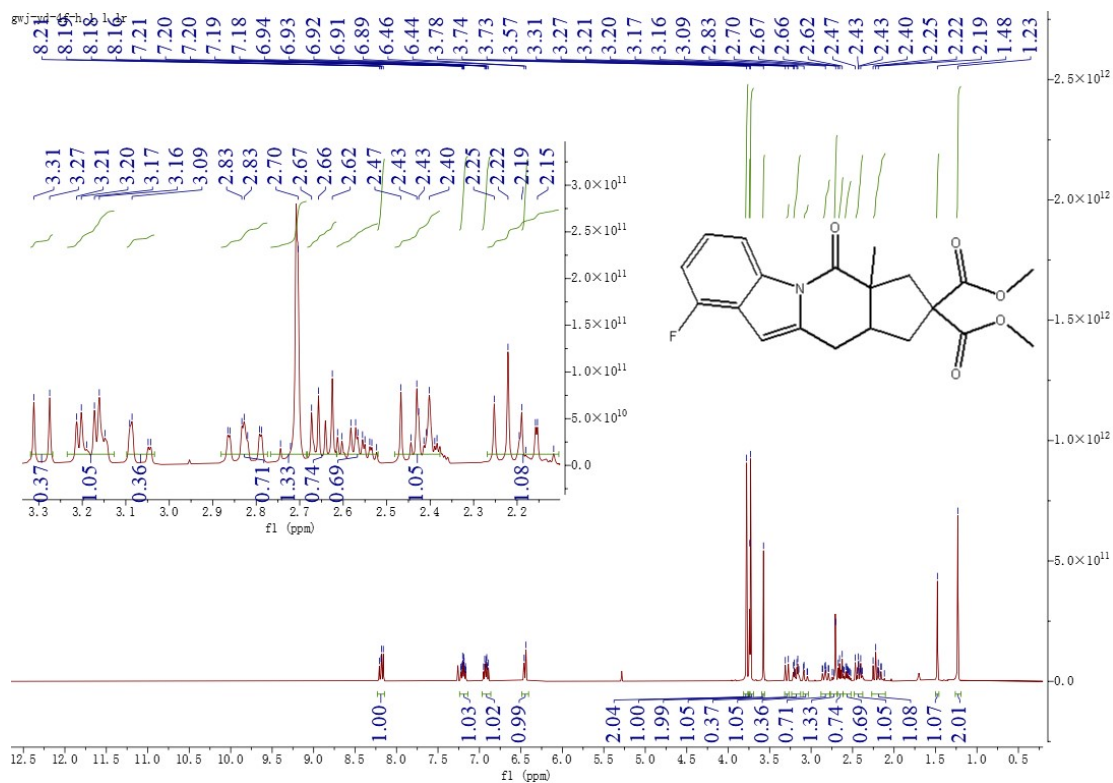

GWJ-ID-4F-C.2.1.1r

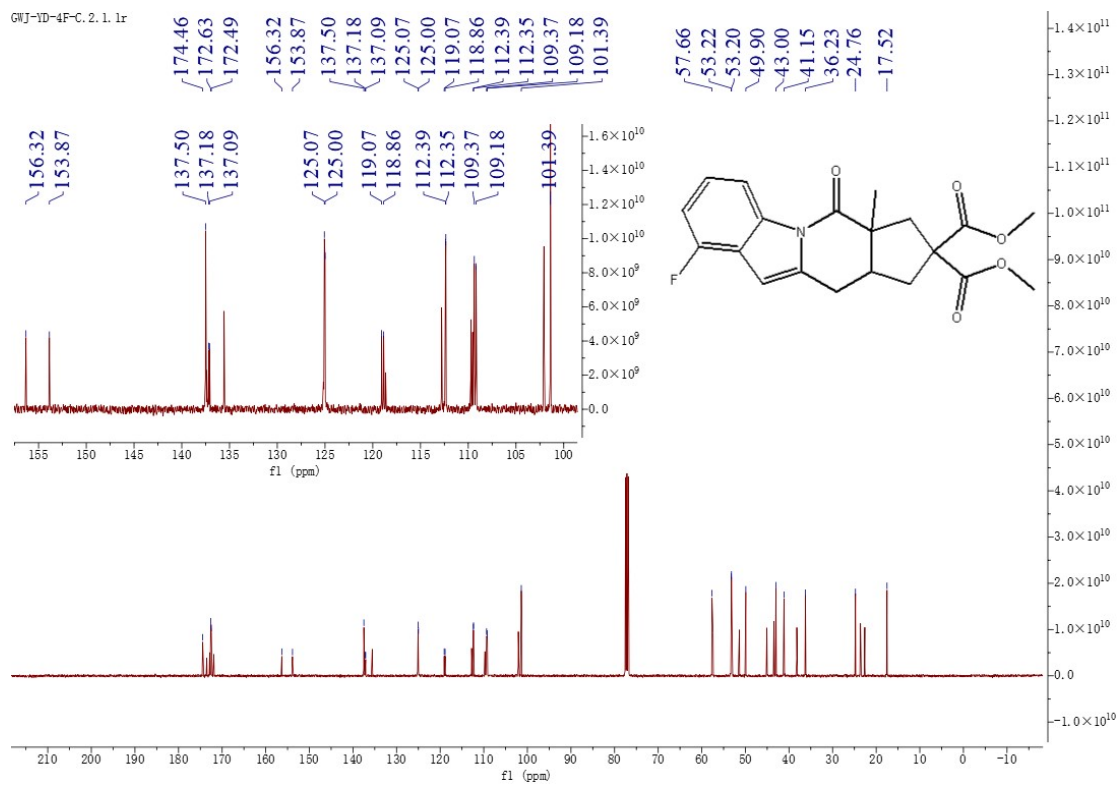

gwj-yd-4f-f.3.1.1r

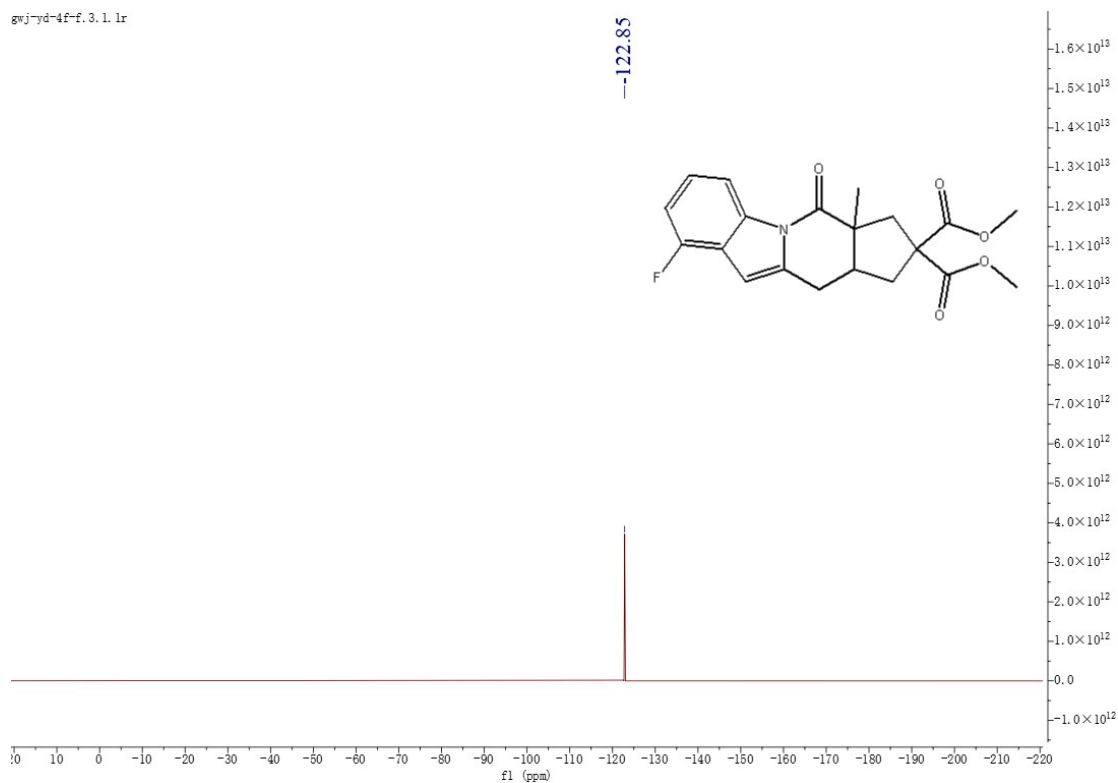

dimethyl 9-chloro-3a-methyl-4-oxo-3a,4,11,11a-tetrahydro-1H-cyclopenta[4,5]pyrid

-o[1,2-a]indole-2,2(3H)-dicarboxylate (19):

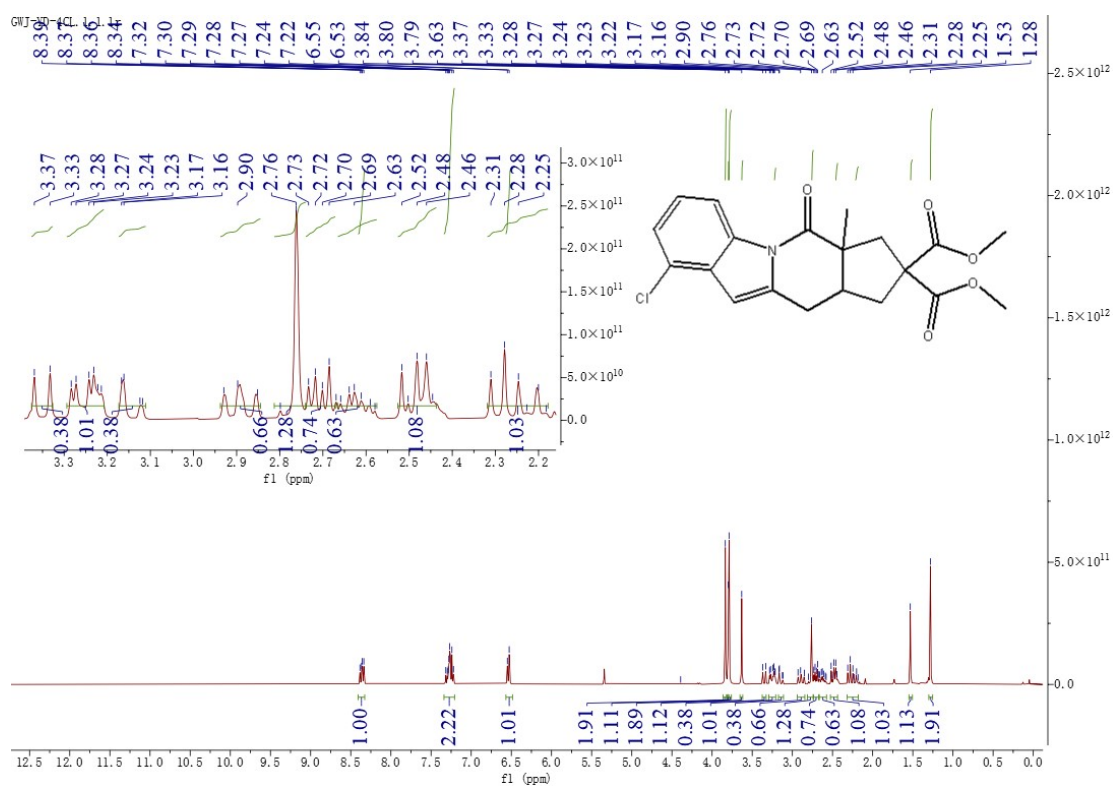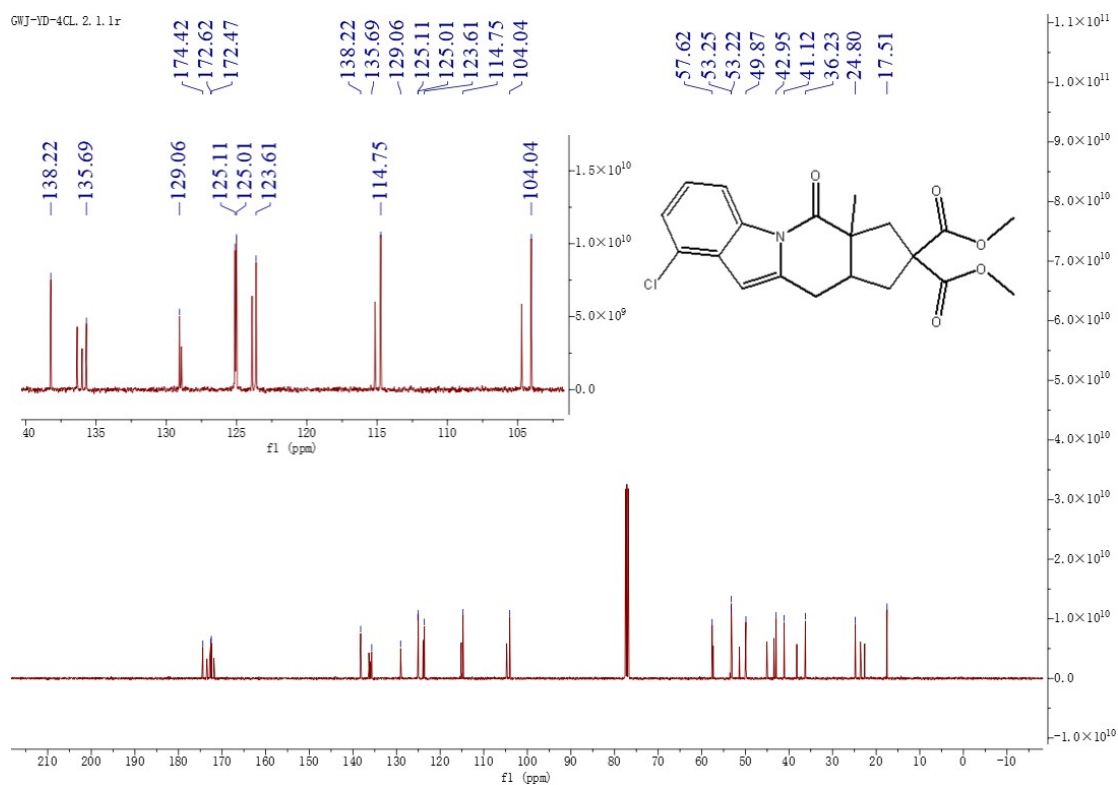

dimethyl 7-cyano-3a-methyl-4-oxo-3a,4,11,11a-tetrahydro-1H-cyclopenta[4,5]pyrido

[1,2-a]indole-2,2(3H)-dicarboxylate (20):

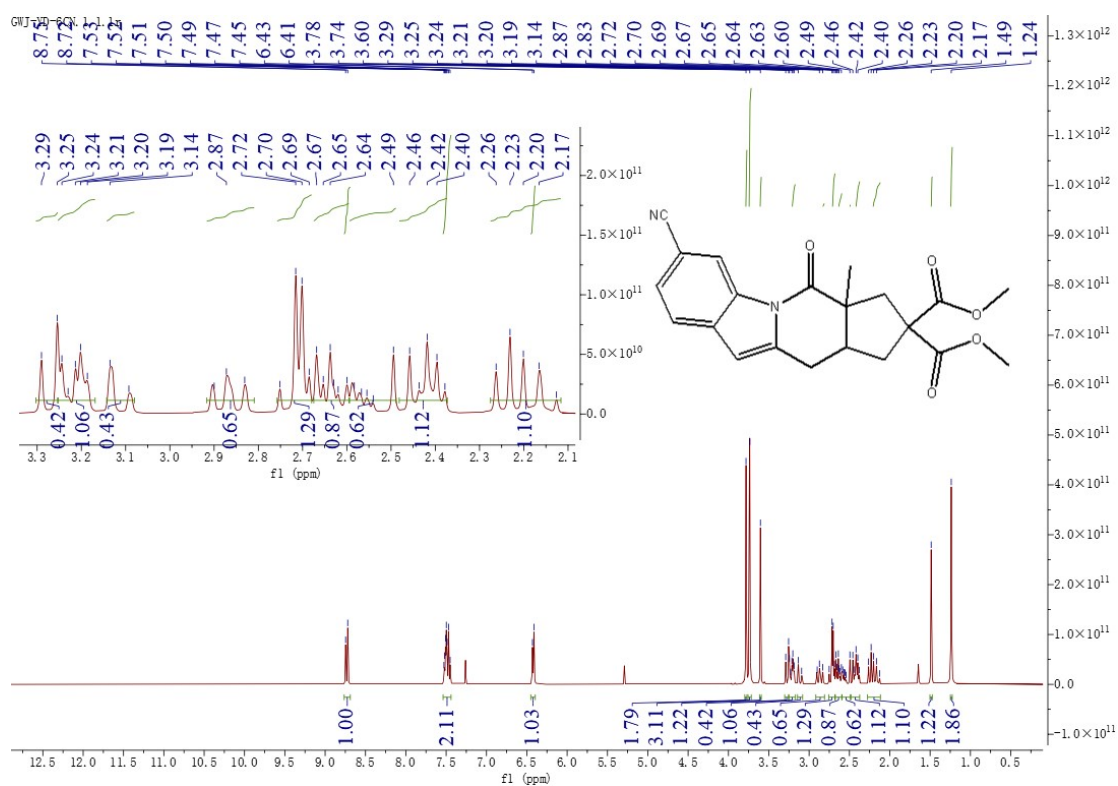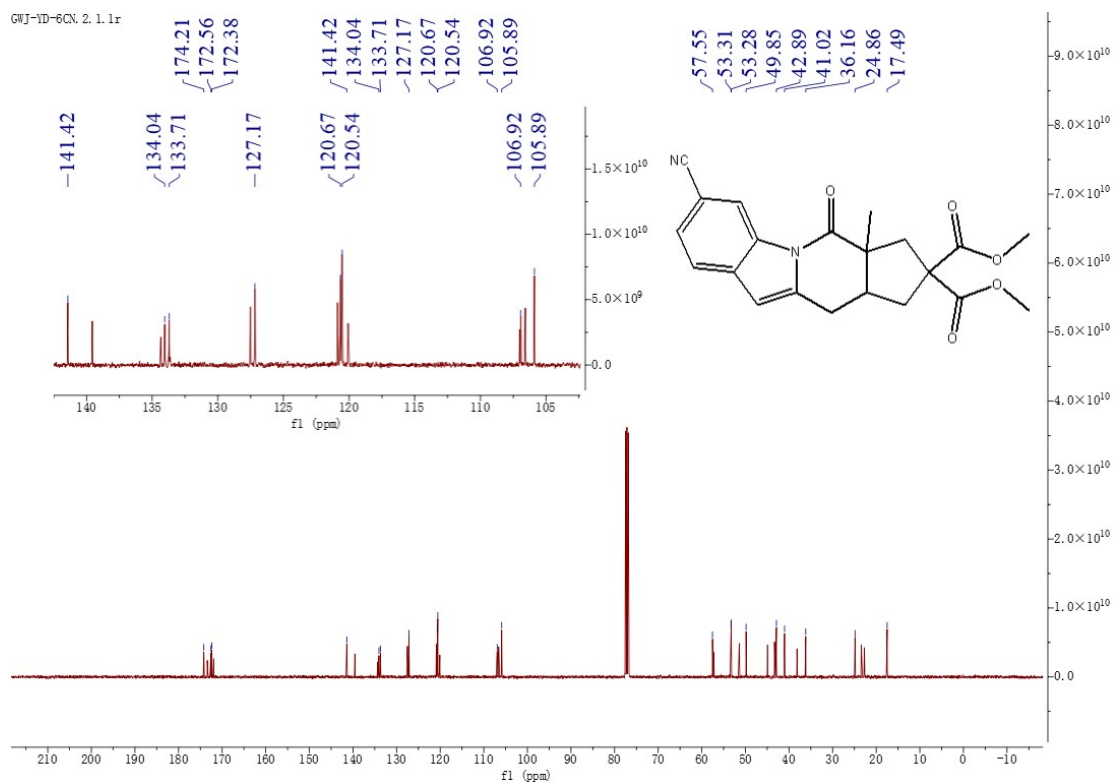

dimethyl 3*a*,10-dimethyl-4-oxo-3*a*,4,11,11*a*-tetrahydro-1*H*-cyclopenta[4,5]pyrido[1,2-*a*]indole-2,2(3*H*)-dicarboxylate (**21**):

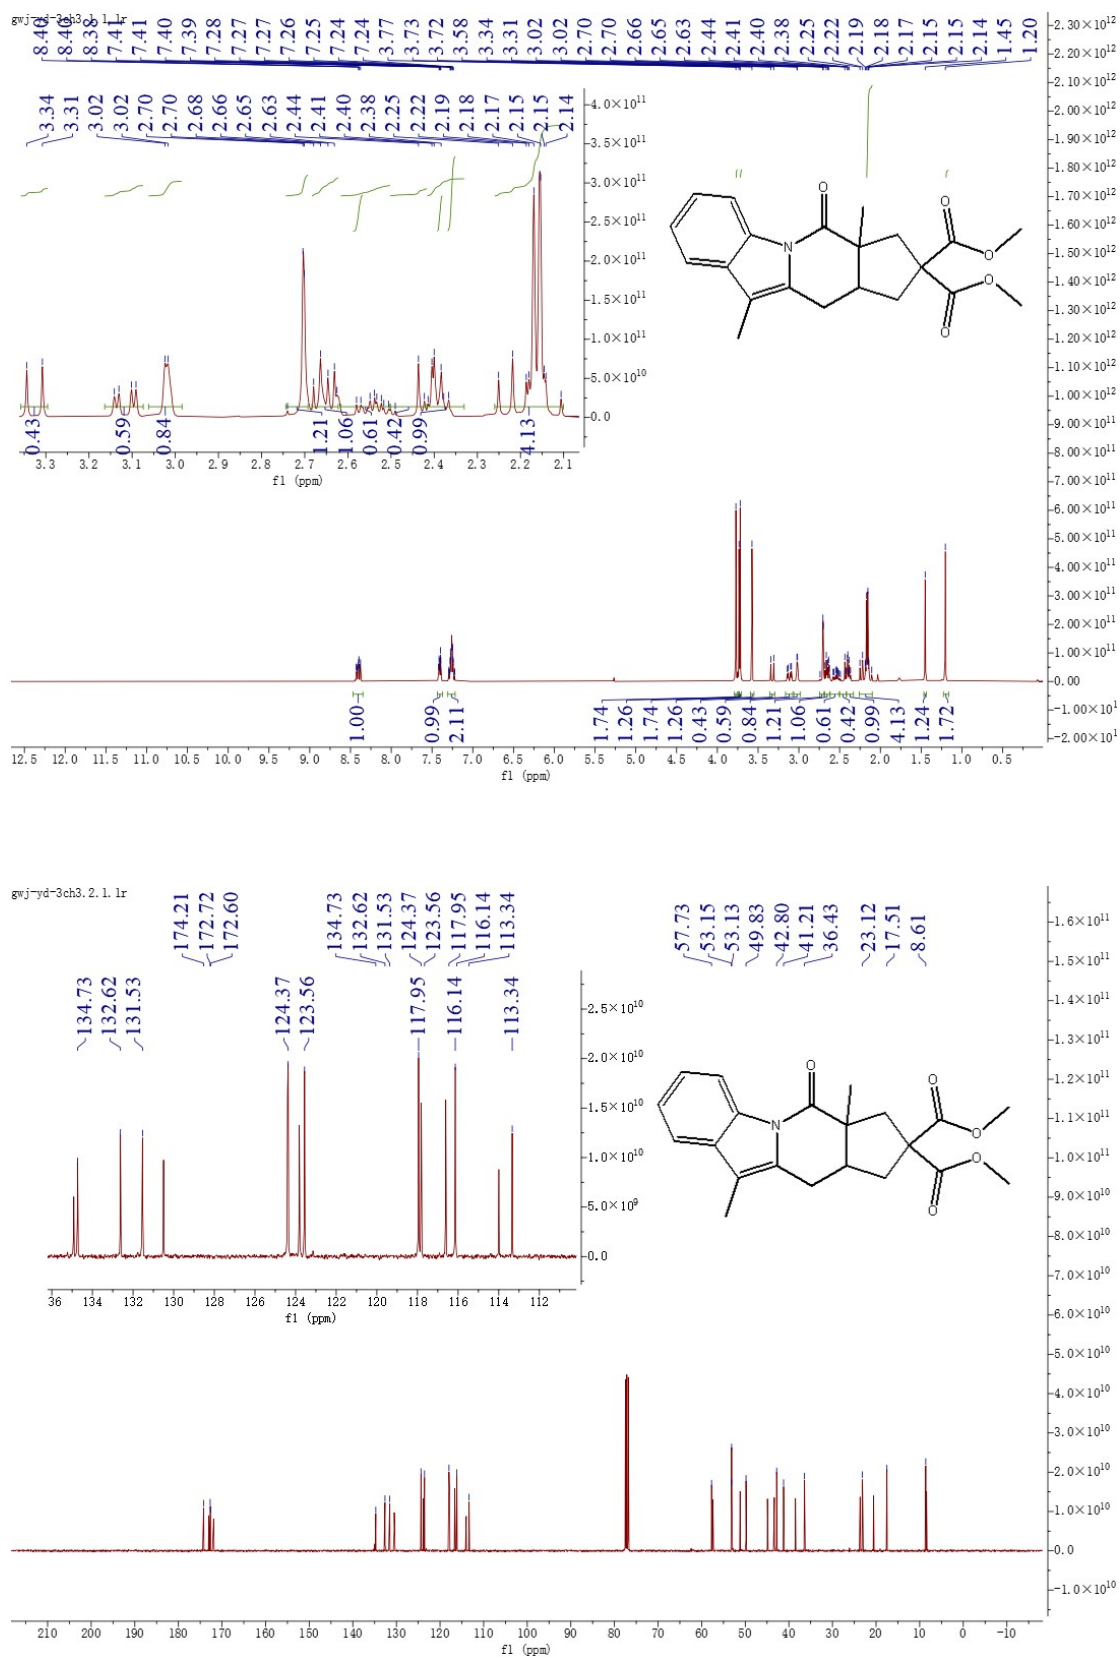

dimethyl 3*a*,10-dimethyl-4-oxo-3*a*,4,11,11*a*-tetrahydro-1*H*-cyclopenta[4,5]pyrido[1,2-*a*]indole-2,2(3*H*)-dicarboxylate (**22**):

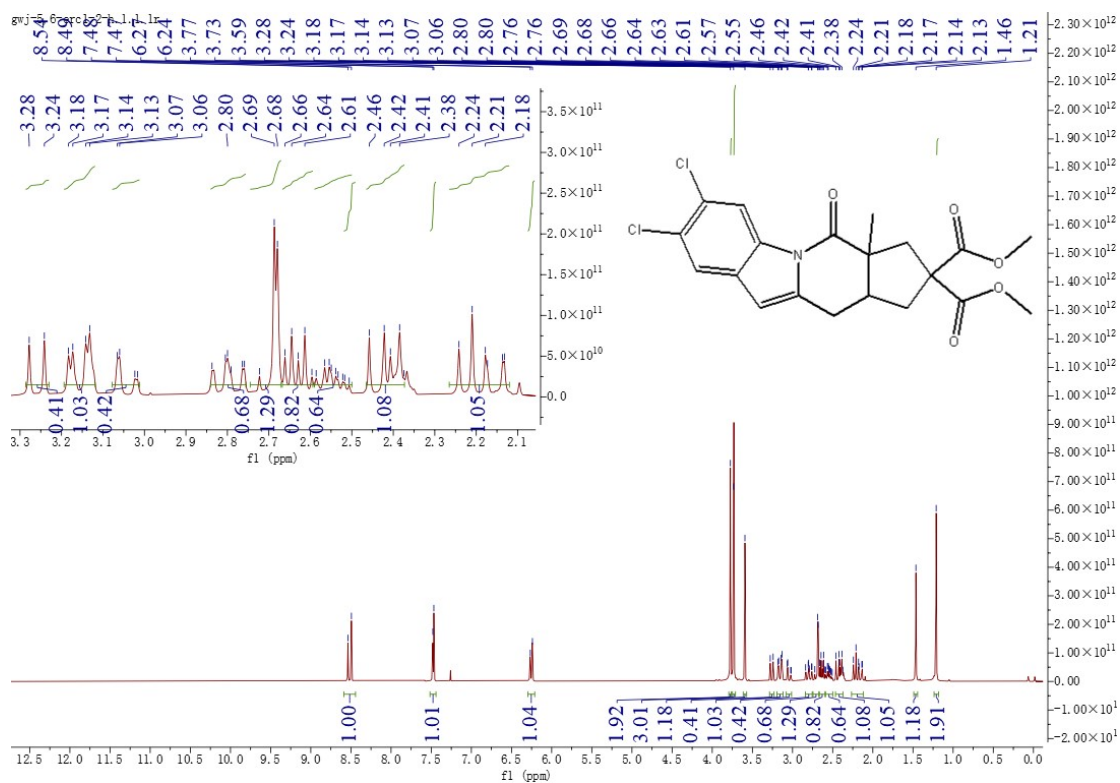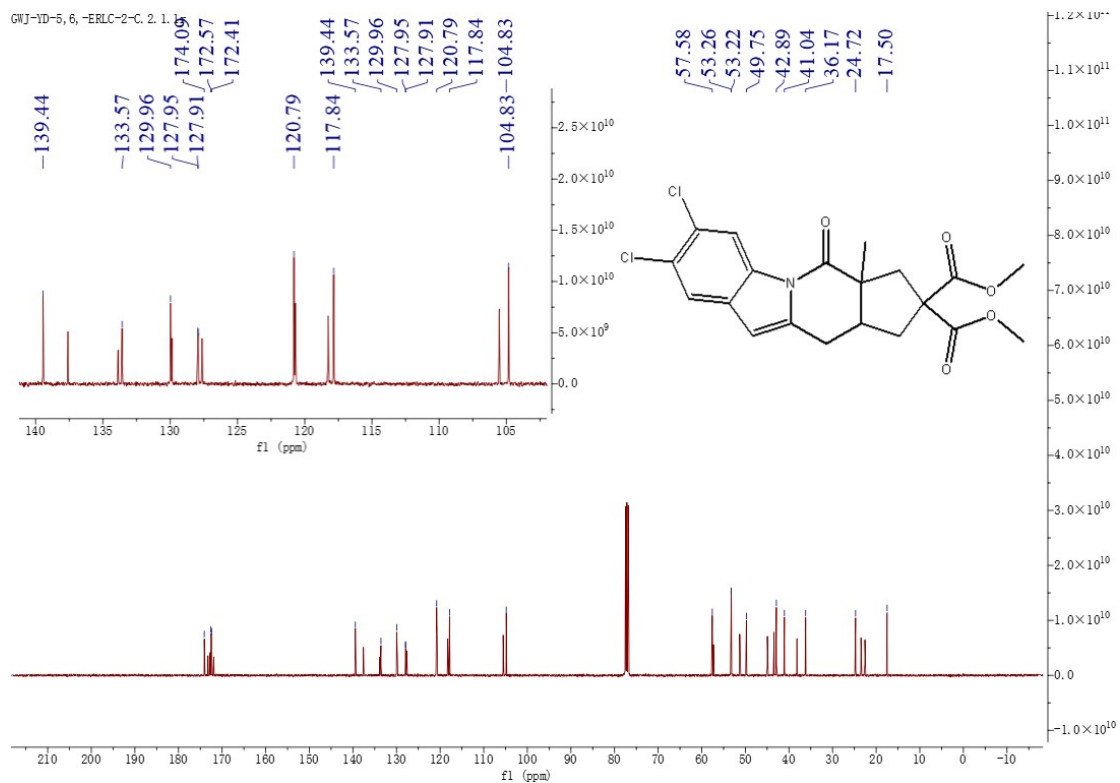

dimethyl 7-chloro-8-fluoro-3a-methyl-4-oxo-3a,4,11,11a-tetrahydro-1H-cyclopenta[4,5]pyrido[1,2-a]indole-2,2(3H)-dicarboxylate (**23**):

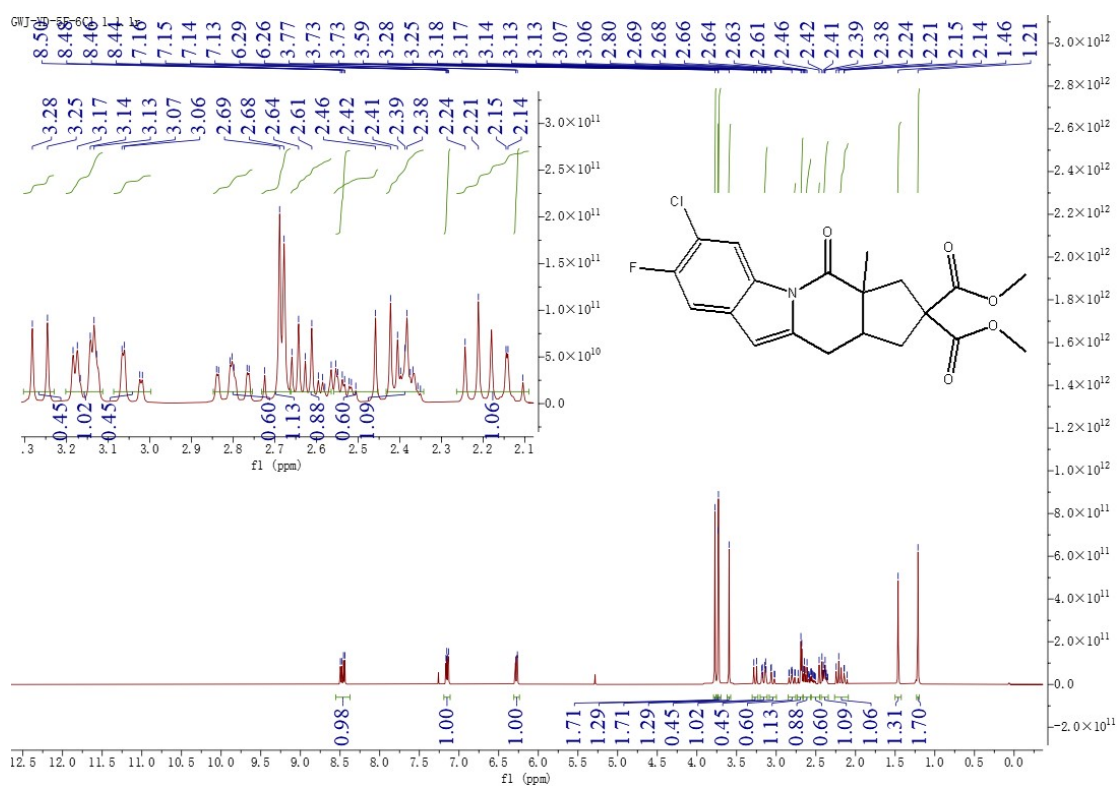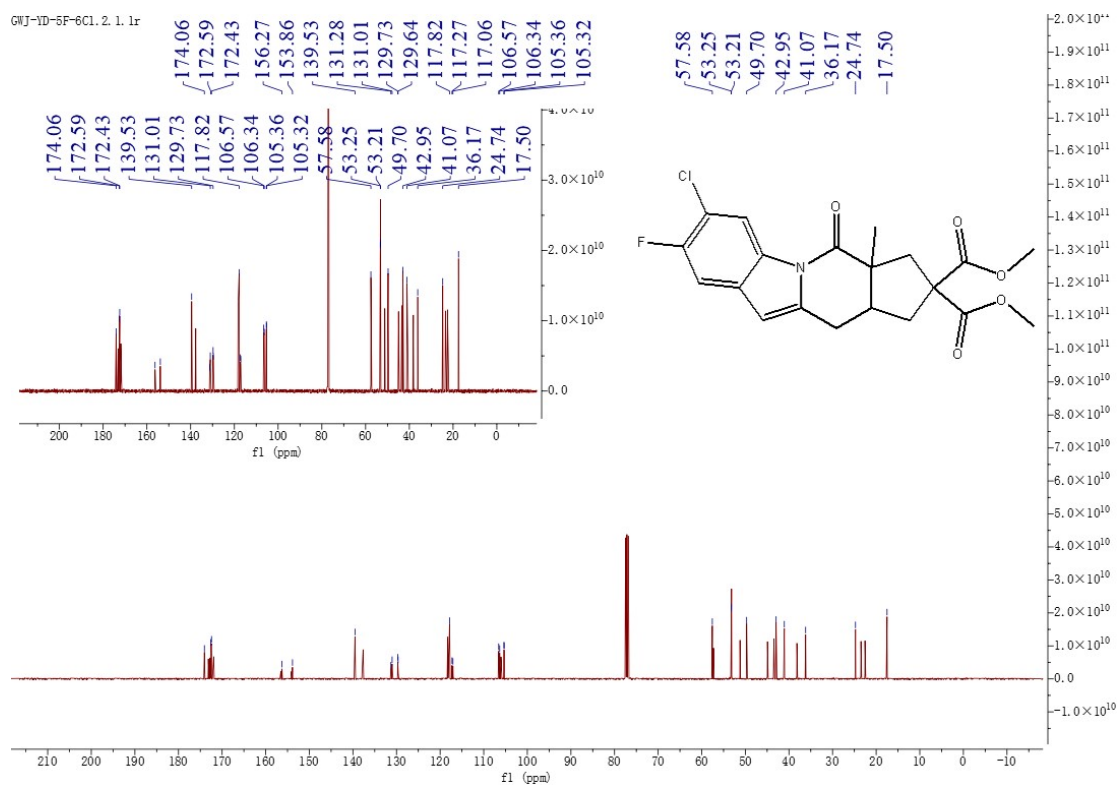

GWJ-ID-5F-6Cl.3.1.1r

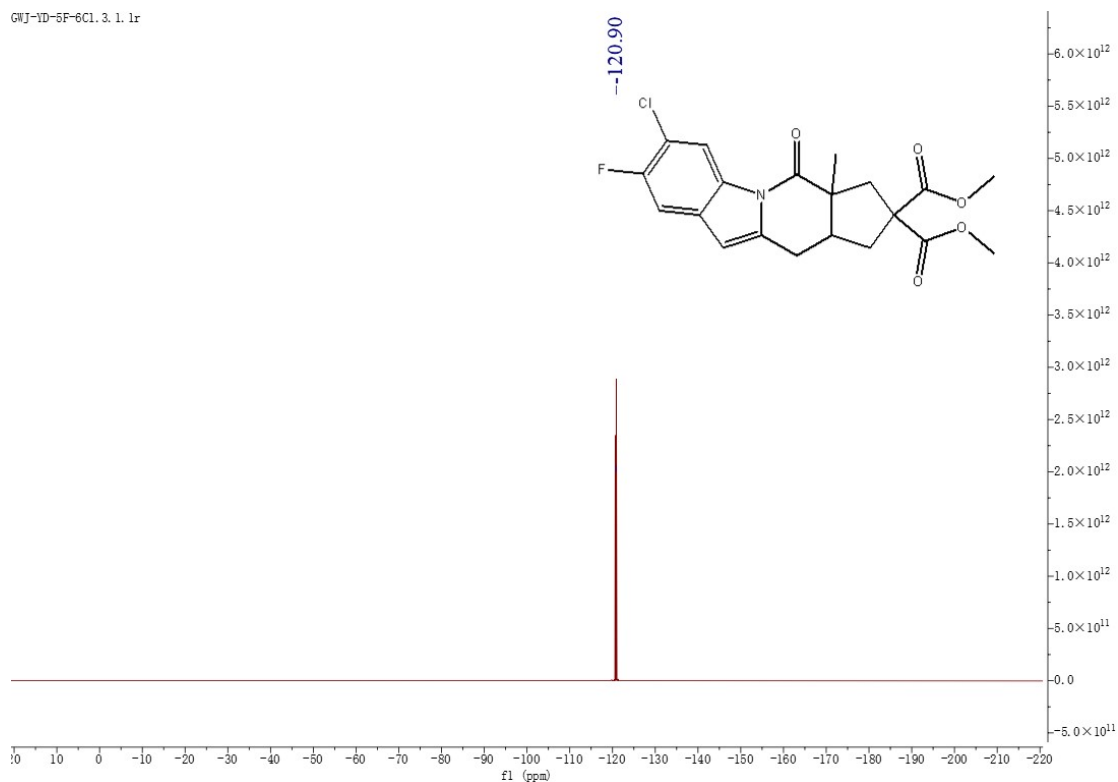

dibenzyl 3a-methyl-4-oxo-3a,4,11,11a-tetrahydro-1H-cyclopenta[4,5]pyrido[1,2-a]in-  
-dole-2,2(3H)-dicarboxylate (24):

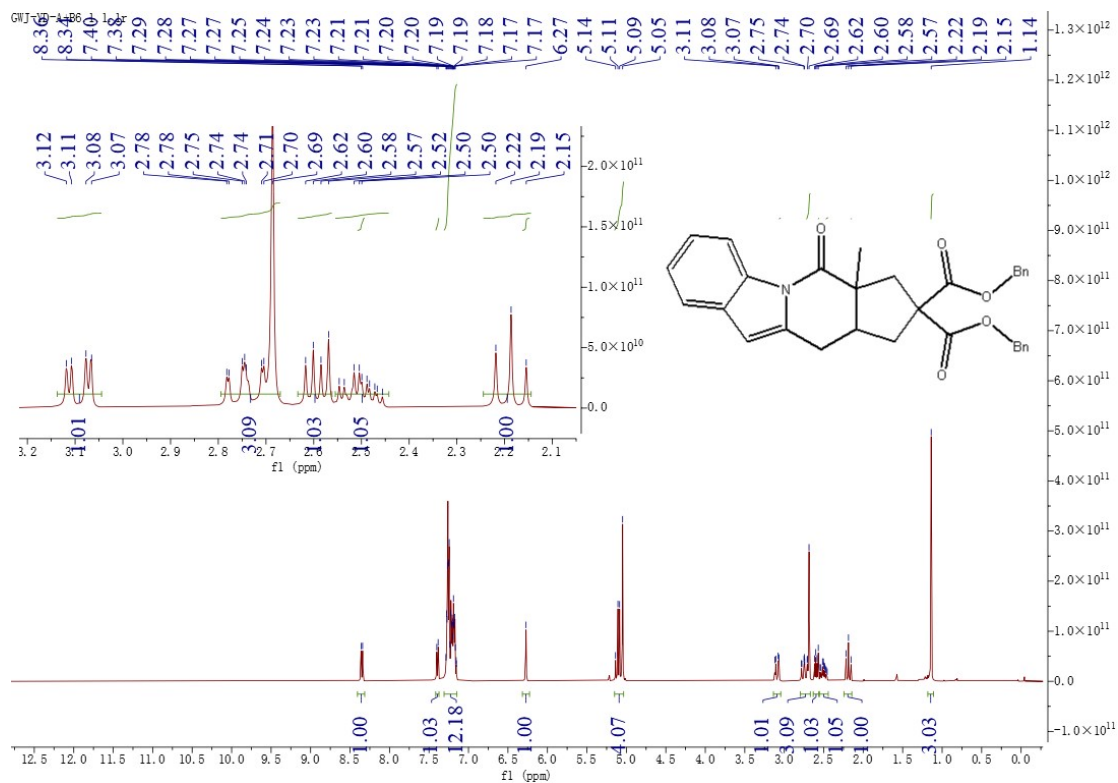

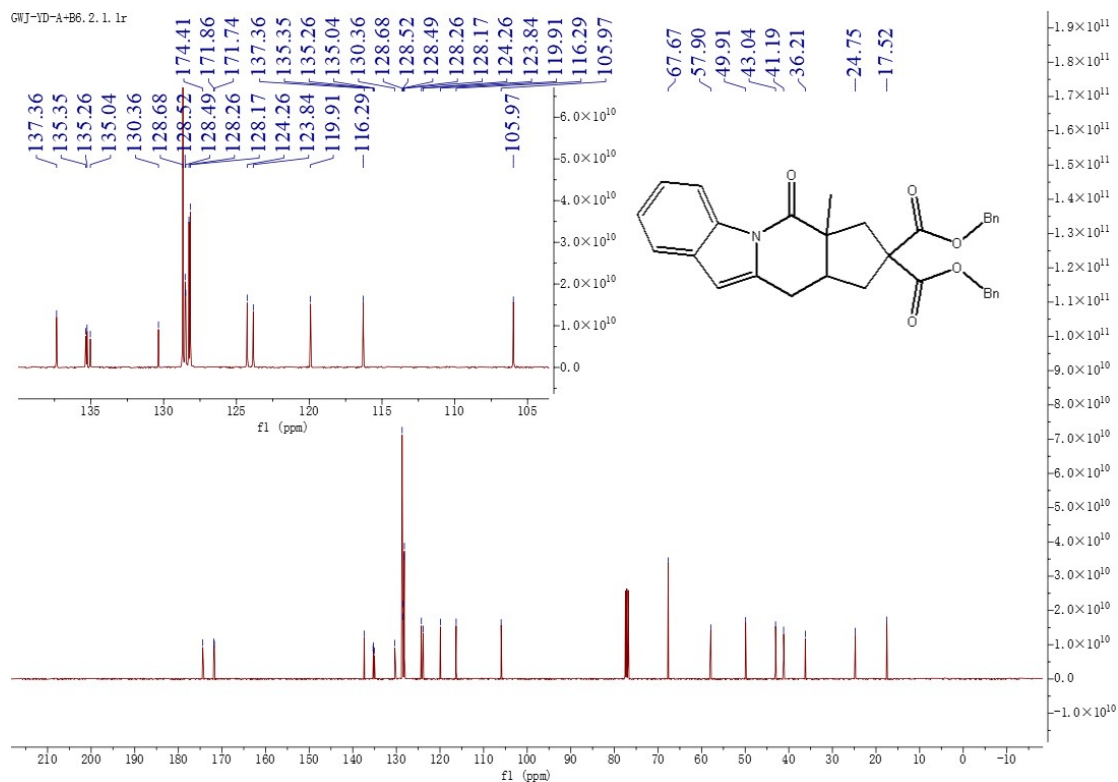

dimethyl 3a,11-dimethyl-4-oxo-3a,4,11,11a-tetrahydro-1H-cyclopenta[4,5]pyrido[1,2-a]indole-2,2(3H)-dicarboxylate (25):

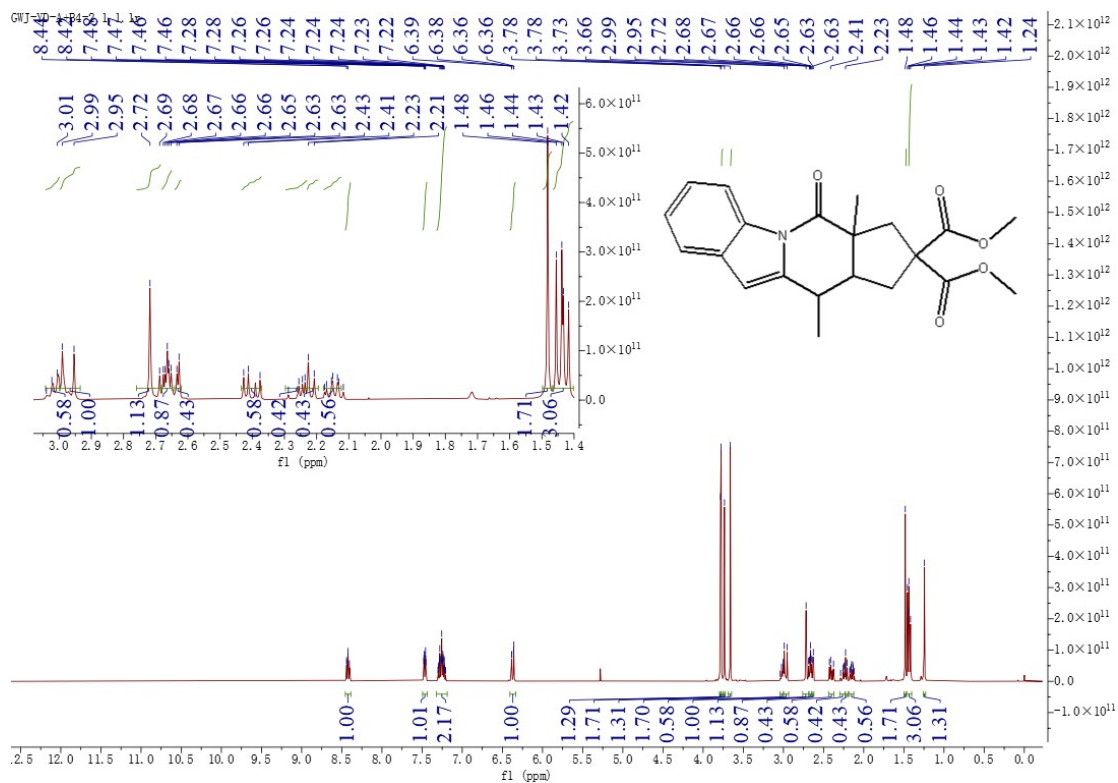

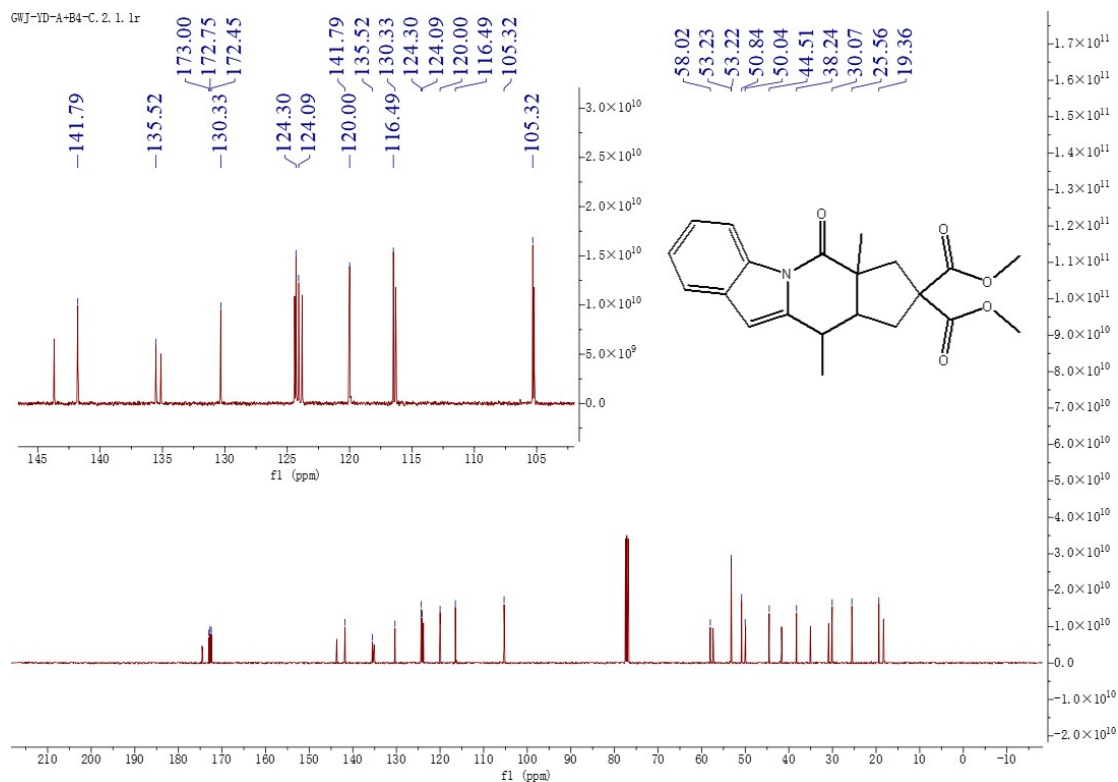

dimethyl 7a,8-dihydrodibenzo[e,g]azulene-6,6(7H)-dicarboxylate (26):

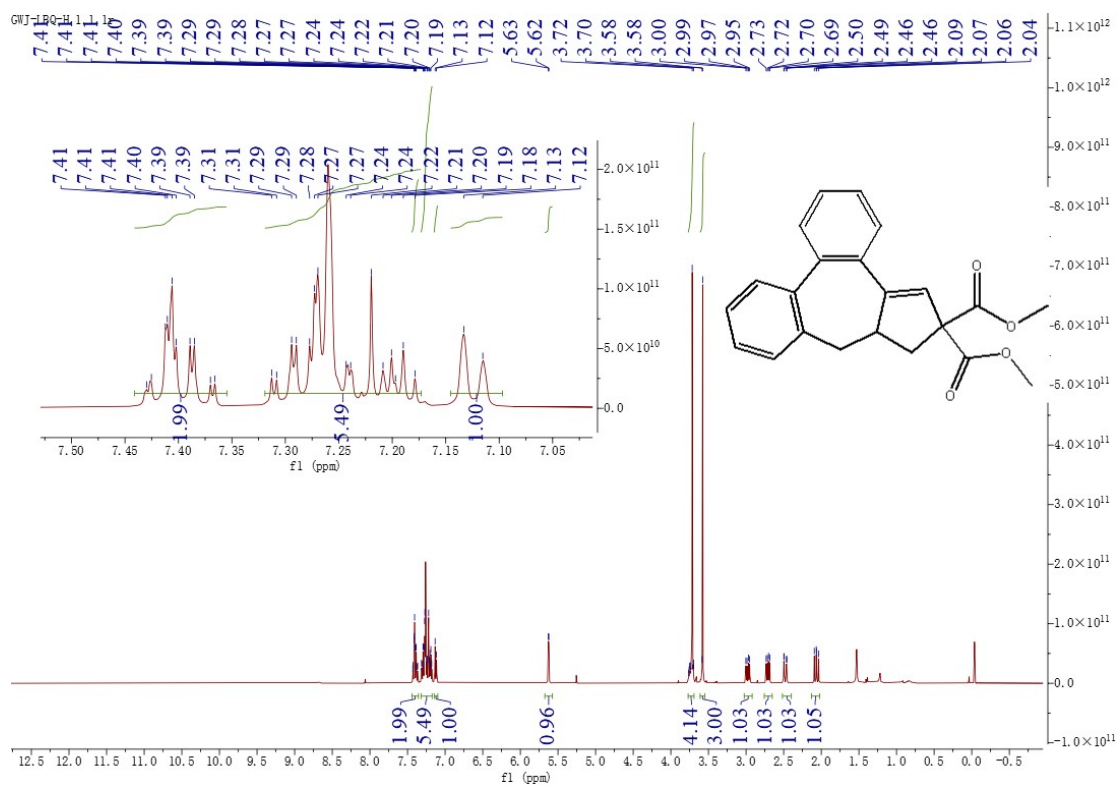

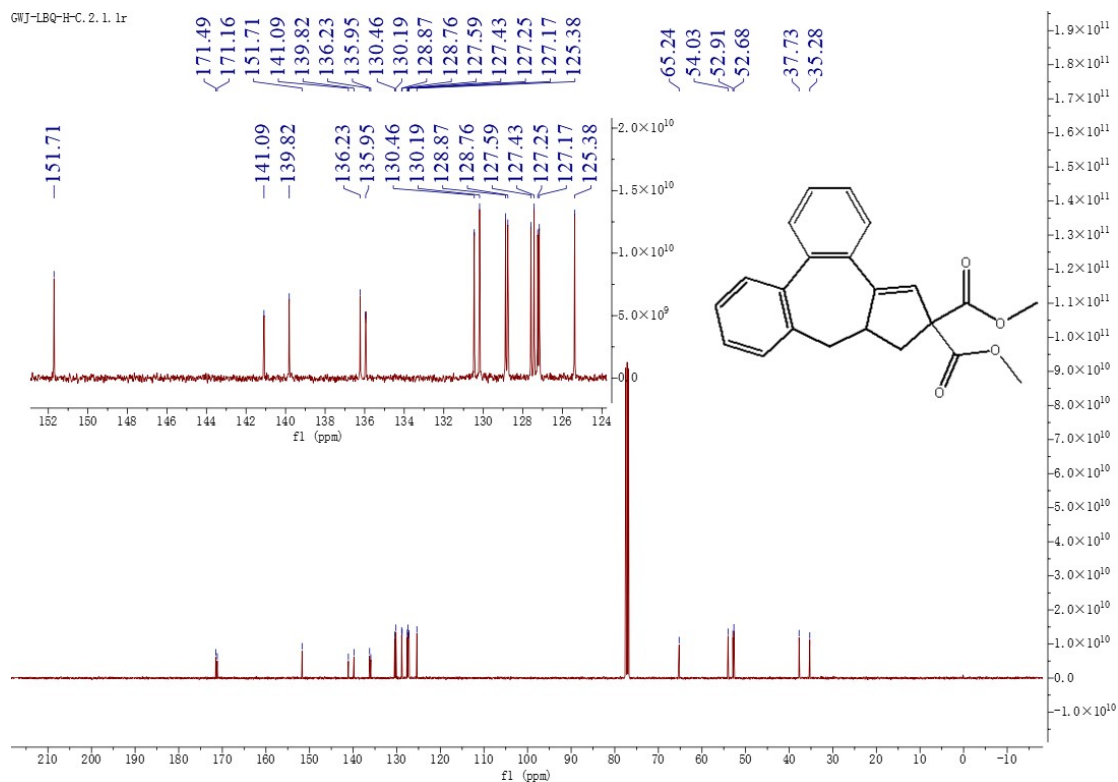

dimethyl 10-methyl-7a,8-dihydrodibenzo[e,g]azulene-6,6(7H)-dicarboxylate (27):

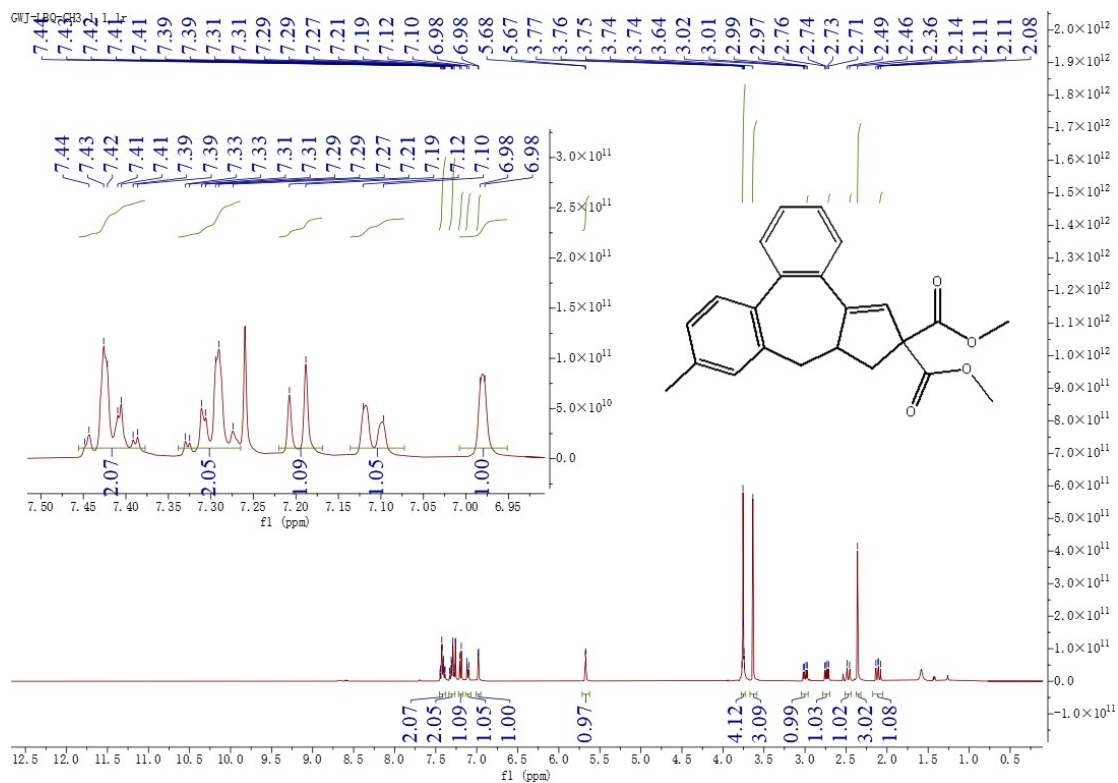

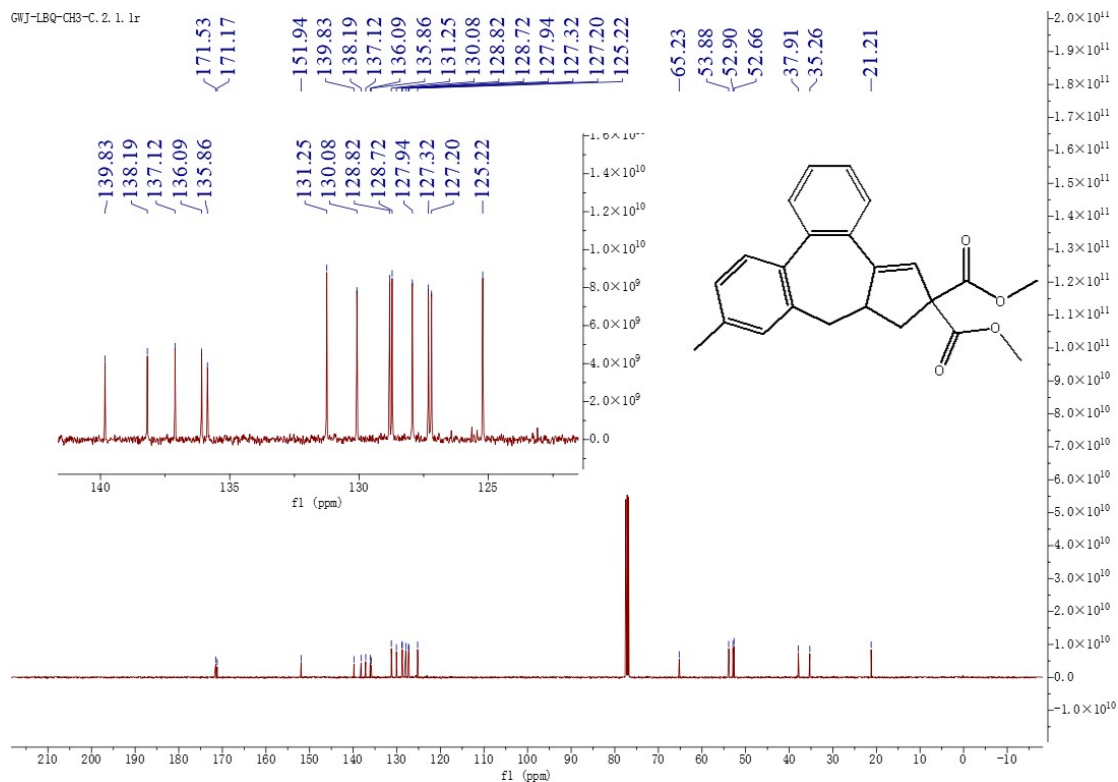

dimethyl 10-fluoro-7a,8-dihydrodibenzo[e,g]azulene-6,6(7H)-dicarboxylate (28):

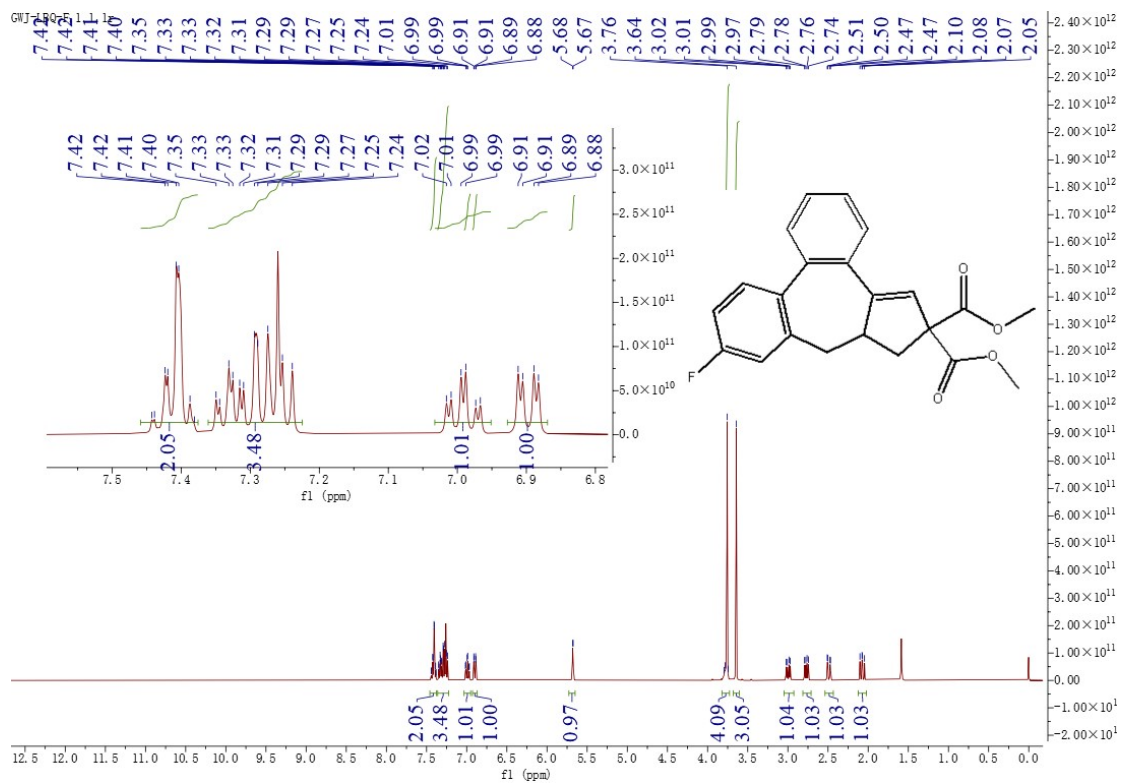

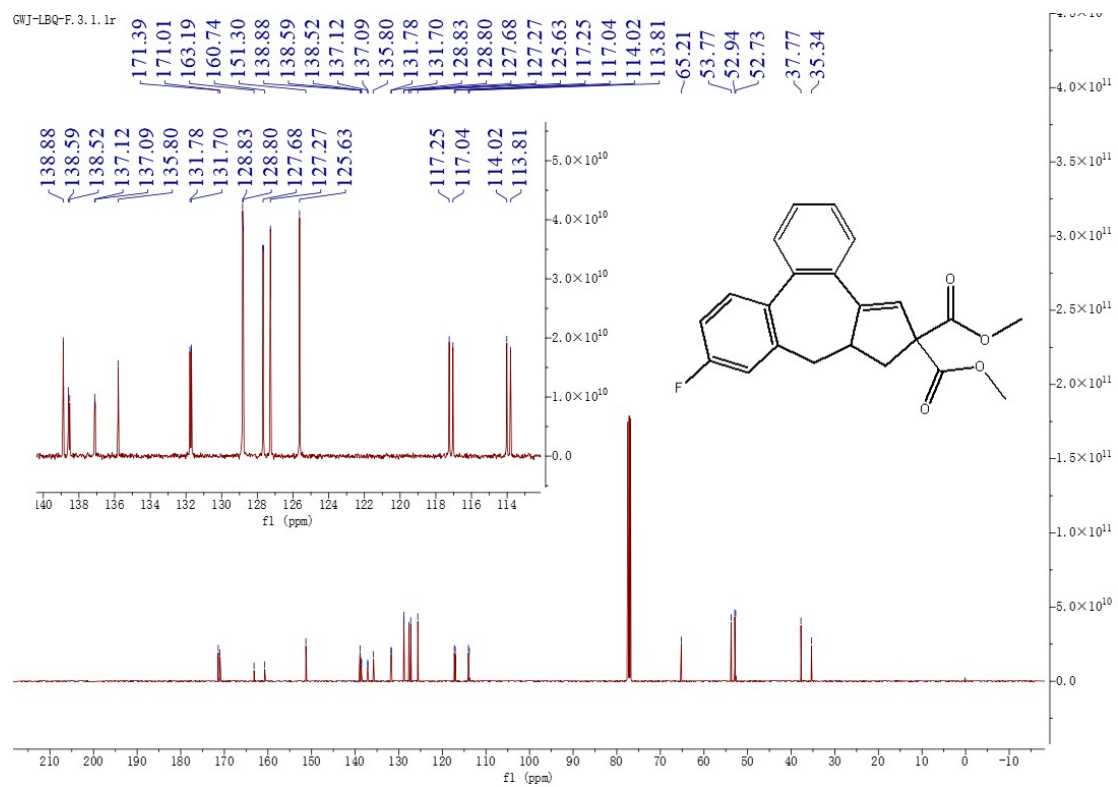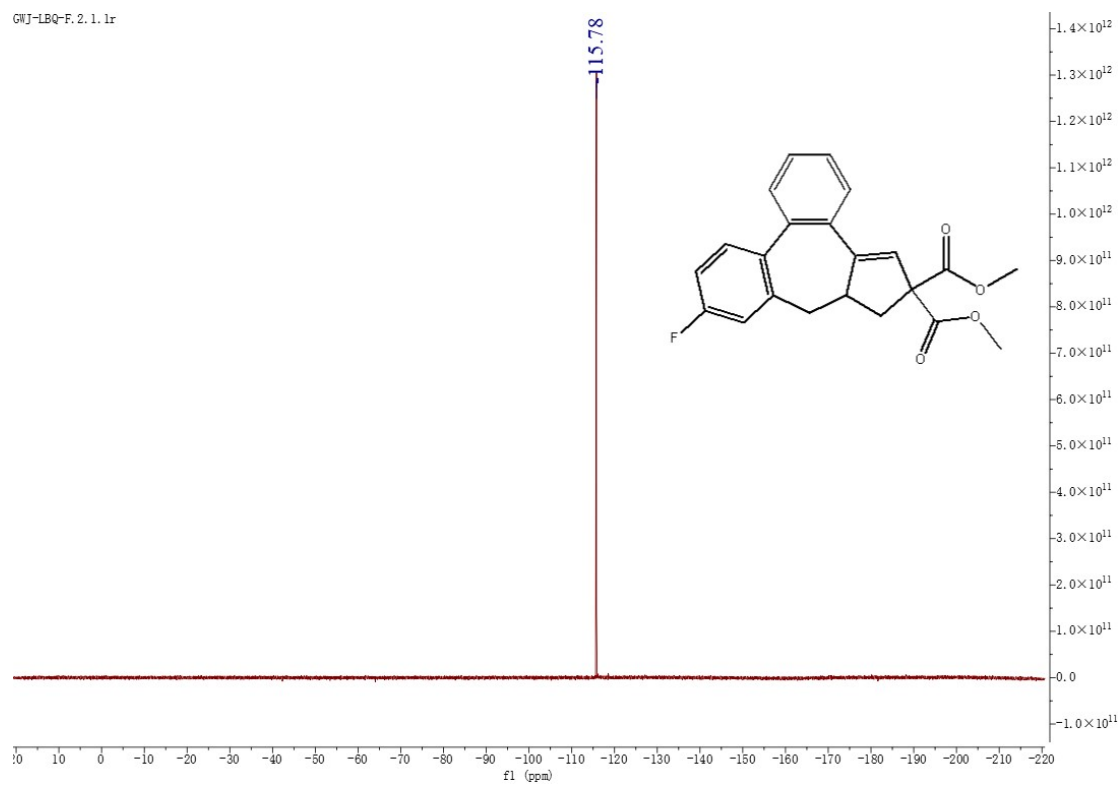

dimethyl 10-methoxy-7a,8-dihydrodibenzo[e,g]azulene-6,6(7H)-dicarboxylate (**29**):

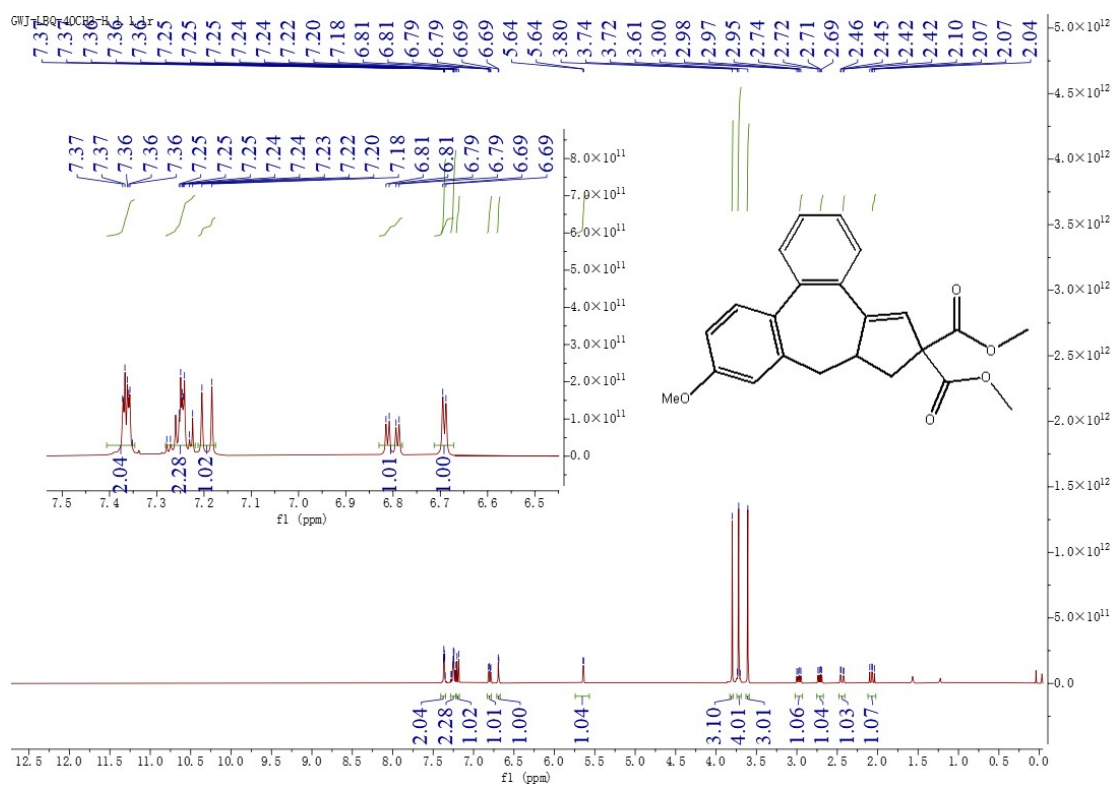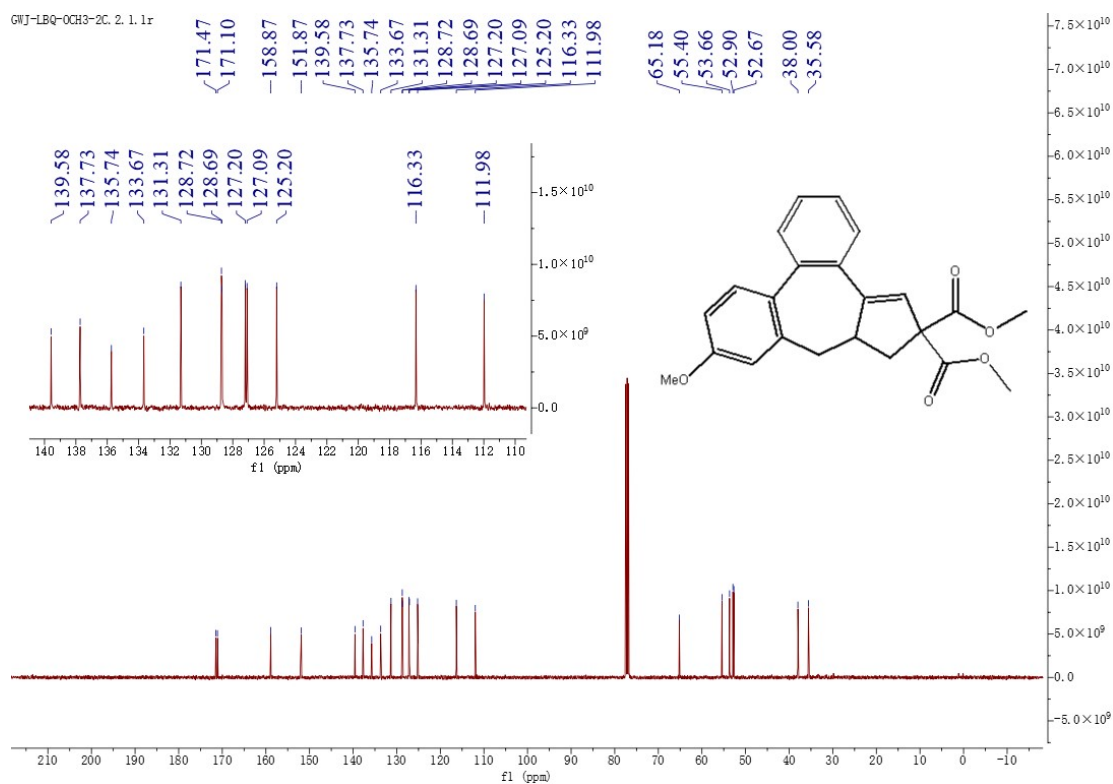

dimethyl 10-phenyl-7a,8-dihydrodibenzo[*e,g*]azulene-6,6(7*H*)-dicarboxylate (**30**):

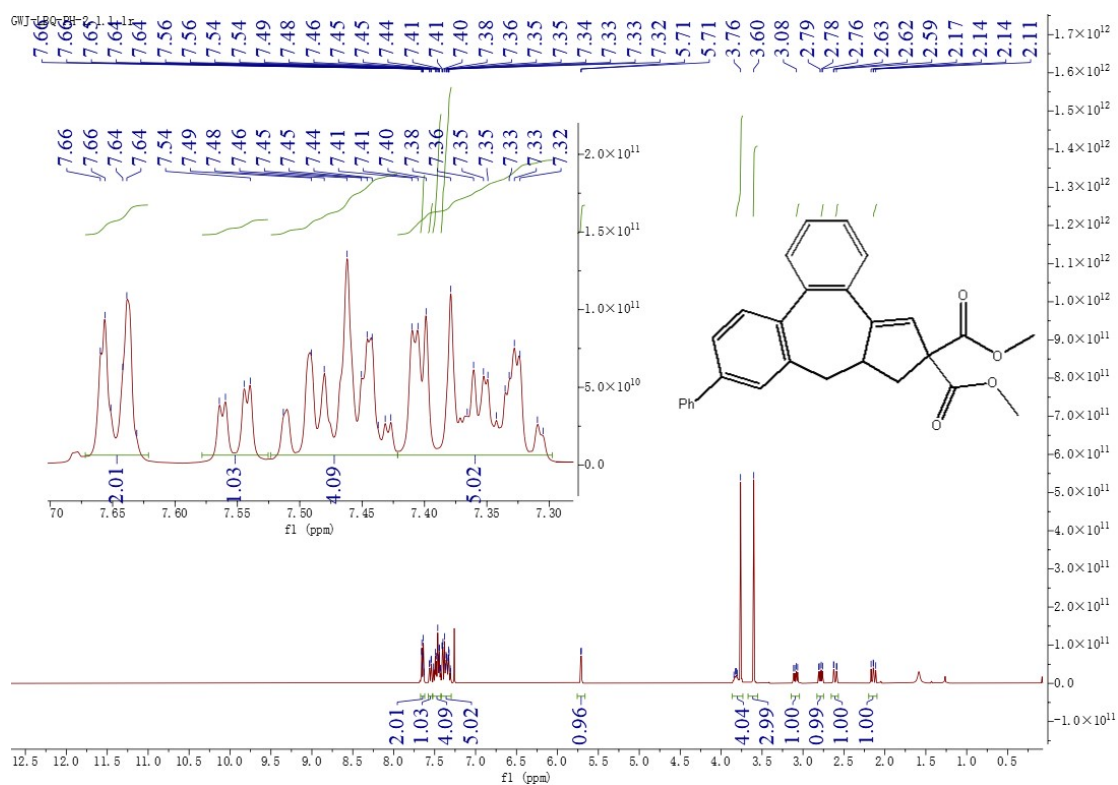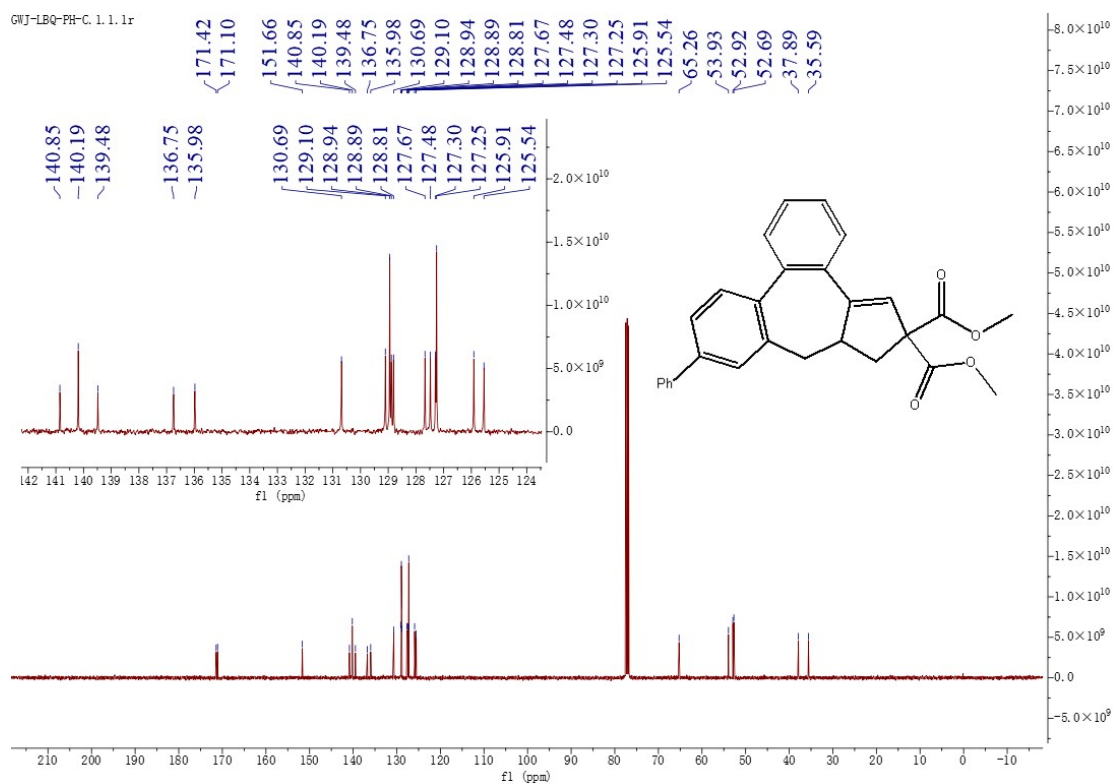

dimethyl 8*a*,9-dihydrobenzo[7,8]azuleno[6,5-*b*]thiophene-10,10(8*H*)-dicarboxylate (31):

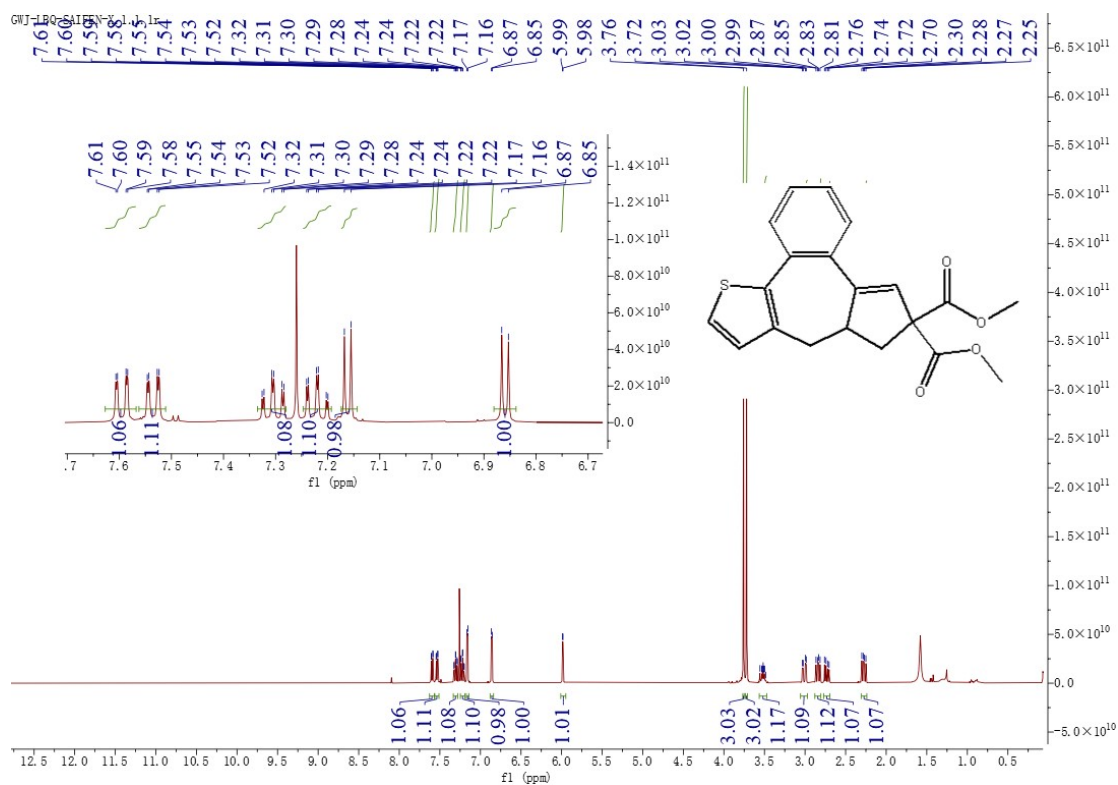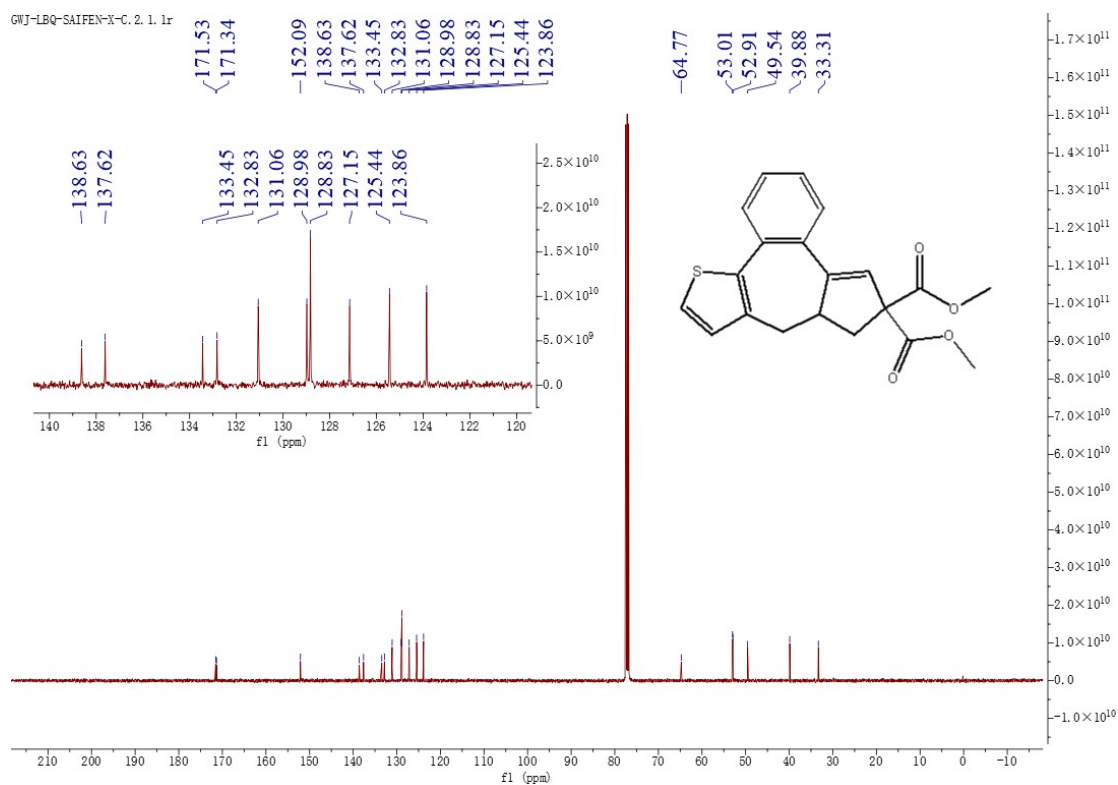

dimethyl 4-(iodomethyl)-3-(4-methoxyphenyl)cyclopent-2-ene-1,1-dicarboxylate (**3**)

2):

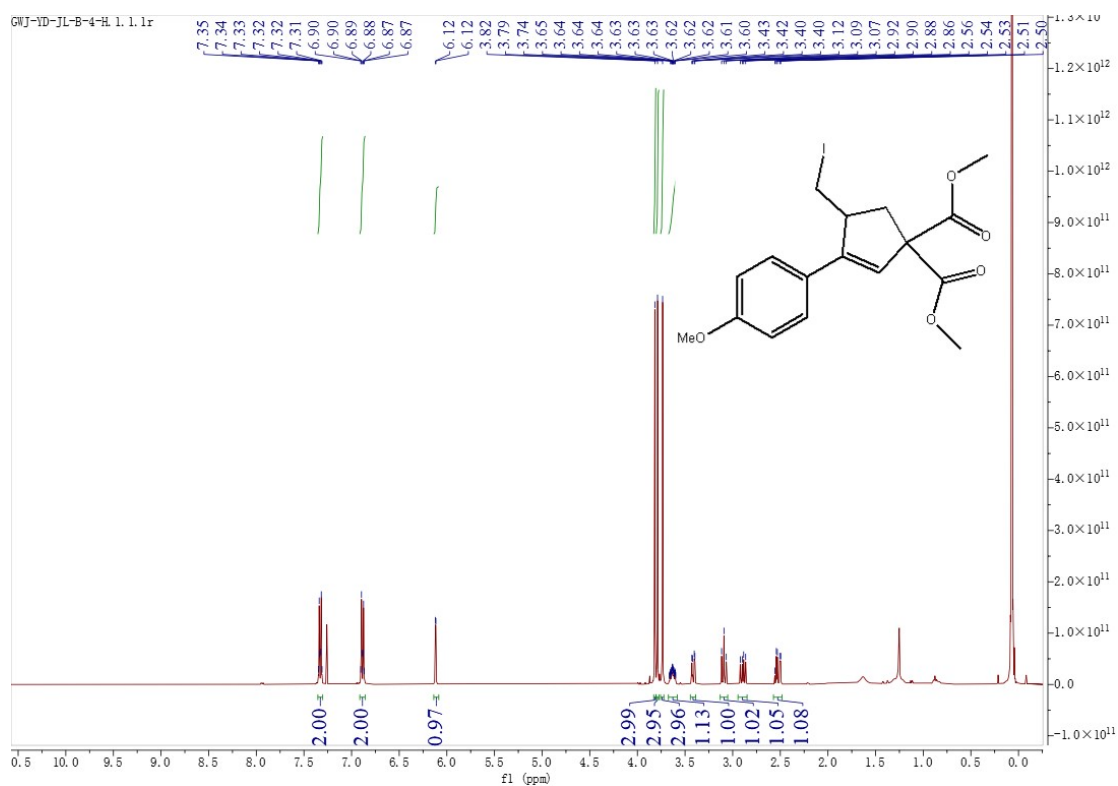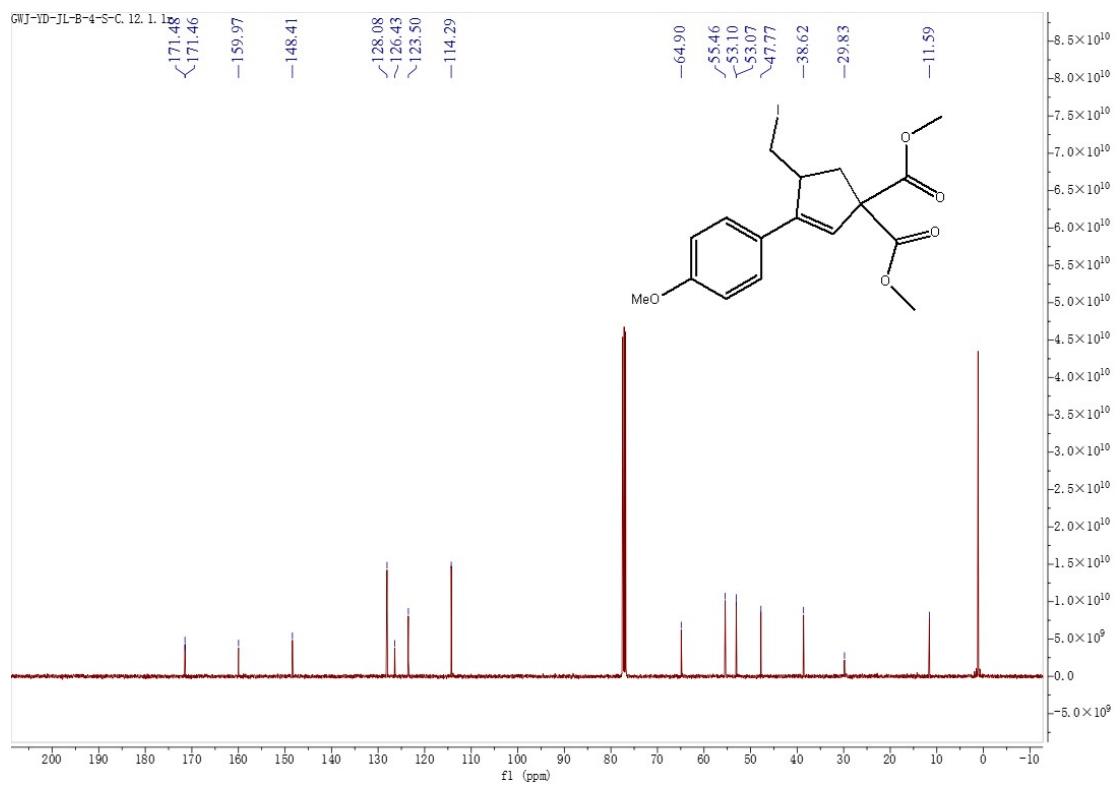

**Chemical Structure of Compound 10:** CCCCC/C=C/C(C(=O)OC)C(C(=O)OC)C=C

**<sup>1</sup>H NMR Spectrum (CDCl<sub>3</sub>):**

| Chemical Shift (ppm)                                                                                                                                                                                                                                                                                                                                                                                                                                                                                                                                                                                                                                                                                                                                                                                                                                                                                                                                                                                                                                                                                                                                                                                                                                                                                                                                                                                                                                                                                                                                                                                                                                                                                                                                                                                                                                                                                                                                                                                                                                                                                                                                                                                                                                                                                 | Integration                              |
|------------------------------------------------------------------------------------------------------------------------------------------------------------------------------------------------------------------------------------------------------------------------------------------------------------------------------------------------------------------------------------------------------------------------------------------------------------------------------------------------------------------------------------------------------------------------------------------------------------------------------------------------------------------------------------------------------------------------------------------------------------------------------------------------------------------------------------------------------------------------------------------------------------------------------------------------------------------------------------------------------------------------------------------------------------------------------------------------------------------------------------------------------------------------------------------------------------------------------------------------------------------------------------------------------------------------------------------------------------------------------------------------------------------------------------------------------------------------------------------------------------------------------------------------------------------------------------------------------------------------------------------------------------------------------------------------------------------------------------------------------------------------------------------------------------------------------------------------------------------------------------------------------------------------------------------------------------------------------------------------------------------------------------------------------------------------------------------------------------------------------------------------------------------------------------------------------------------------------------------------------------------------------------------------------|------------------------------------------|
| 7.38, 7.36, 7.34, 7.32, 7.29, 7.26, 7.24, 7.22, 7.20, 7.18, 7.16, 7.14, 7.12, 7.10, 7.08, 7.06, 7.04, 7.02, 7.00, 6.98, 6.96, 6.94, 6.92, 6.90, 6.88, 6.86, 6.84, 6.82, 6.80, 6.78, 6.76, 6.74, 6.72, 6.70, 6.68, 6.66, 6.64, 6.62, 6.60, 6.58, 6.56, 6.54, 6.52, 6.50, 6.48, 6.46, 6.44, 6.42, 6.40, 6.38, 6.36, 6.34, 6.32, 6.30, 6.28, 6.26, 6.24, 6.22, 6.20, 6.18, 6.16, 6.14, 6.12, 6.10, 6.08, 6.06, 6.04, 6.02, 6.00, 5.98, 5.96, 5.94, 5.92, 5.90, 5.88, 5.86, 5.84, 5.82, 5.80, 5.78, 5.76, 5.74, 5.72, 5.70, 5.68, 5.66, 5.64, 5.62, 5.60, 5.58, 5.56, 5.54, 5.52, 5.50, 5.48, 5.46, 5.44, 5.42, 5.40, 5.38, 5.36, 5.34, 5.32, 5.30, 5.28, 5.26, 5.24, 5.22, 5.20, 5.18, 5.16, 5.14, 5.12, 5.10, 5.08, 5.06, 5.04, 5.02, 5.00, 4.98, 4.96, 4.94, 4.92, 4.90, 4.88, 4.86, 4.84, 4.82, 4.80, 4.78, 4.76, 4.74, 4.72, 4.70, 4.68, 4.66, 4.64, 4.62, 4.60, 4.58, 4.56, 4.54, 4.52, 4.50, 4.48, 4.46, 4.44, 4.42, 4.40, 4.38, 4.36, 4.34, 4.32, 4.30, 4.28, 4.26, 4.24, 4.22, 4.20, 4.18, 4.16, 4.14, 4.12, 4.10, 4.08, 4.06, 4.04, 4.02, 4.00, 3.98, 3.96, 3.94, 3.92, 3.90, 3.88, 3.86, 3.84, 3.82, 3.80, 3.78, 3.76, 3.74, 3.72, 3.70, 3.68, 3.66, 3.64, 3.62, 3.60, 3.58, 3.56, 3.54, 3.52, 3.50, 3.48, 3.46, 3.44, 3.42, 3.40, 3.38, 3.36, 3.34, 3.32, 3.30, 3.28, 3.26, 3.24, 3.22, 3.20, 3.18, 3.16, 3.14, 3.12, 3.10, 3.08, 3.06, 3.04, 3.02, 3.00, 2.98, 2.96, 2.94, 2.92, 2.90, 2.88, 2.86, 2.84, 2.82, 2.80, 2.78, 2.76, 2.74, 2.72, 2.70, 2.68, 2.66, 2.64, 2.62, 2.60, 2.58, 2.56, 2.54, 2.52, 2.50, 2.48, 2.46, 2.44, 2.42, 2.40, 2.38, 2.36, 2.34, 2.32, 2.30, 2.28, 2.26, 2.24, 2.22, 2.20, 2.18, 2.16, 2.14, 2.12, 2.10, 2.08, 2.06, 2.04, 2.02, 2.00, 1.98, 1.96, 1.94, 1.92, 1.90, 1.88, 1.86, 1.84, 1.82, 1.80, 1.78, 1.76, 1.74, 1.72, 1.70, 1.68, 1.66, 1.64, 1.62, 1.60, 1.58, 1.56, 1.54, 1.52, 1.50, 1.48, 1.46, 1.44, 1.42, 1.40, 1.38, 1.36, 1.34, 1.32, 1.30, 1.28, 1.26, 1.24, 1.22, 1.20, 1.18, 1.16, 1.14, 1.12, 1.10, 1.08, 1.06, 1.04, 1.02, 1.00, 0.98, 0.96, 0.94, 0.92, 0.90, 0.88, 0.86, 0.84, 0.82, 0.80, 0.78, 0.76, 0.74, 0.72, 0.70, 0.68, 0.66, 0.64, 0.62, 0.60, 0.58, 0.56, 0.54, 0.52, 0.50, 0.48, 0.46, 0.44, 0.42, 0.40, 0.38, 0.36, 0.34, 0.32, 0.30, 0.28, 0.26, 0.24, 0.22, 0.20, 0.18, 0.16, 0.14, 0.12, 0.10, 0.08, 0.06, 0.04, 0.02, 0.00 | 3.18, 3.00, 1.08, 1.16, 2.02, 1.13, 3.23 |

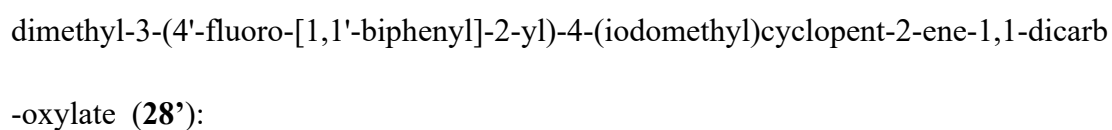

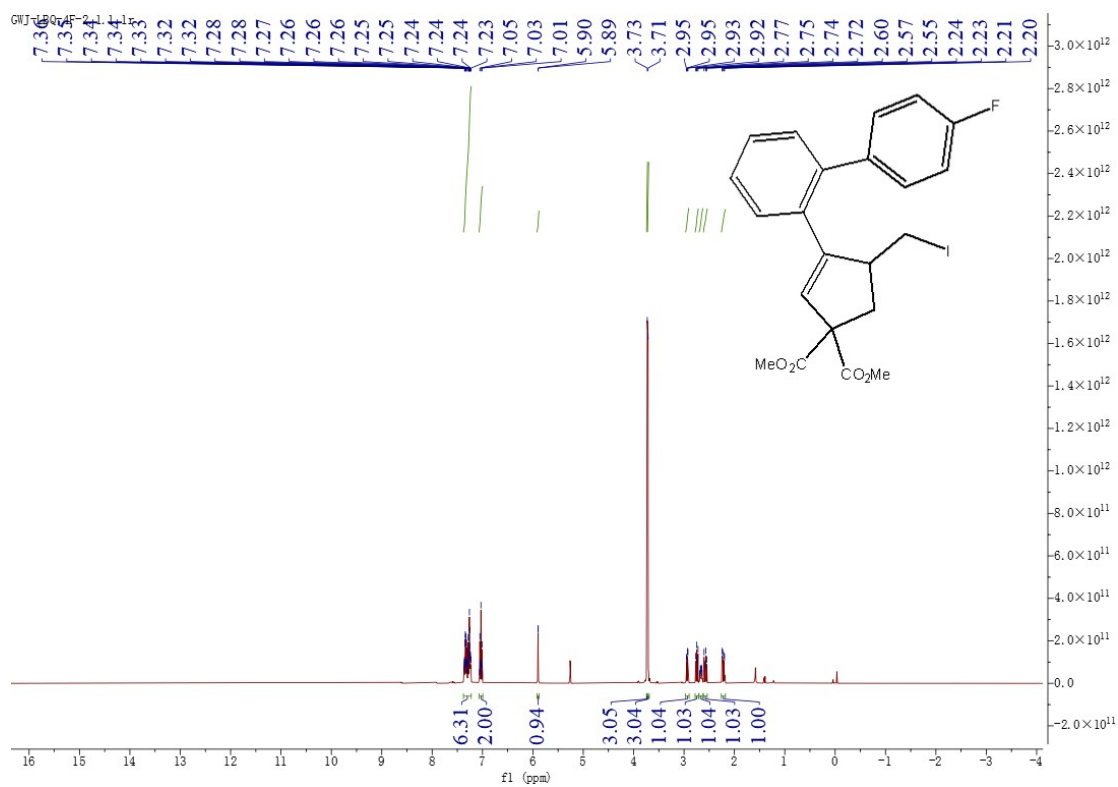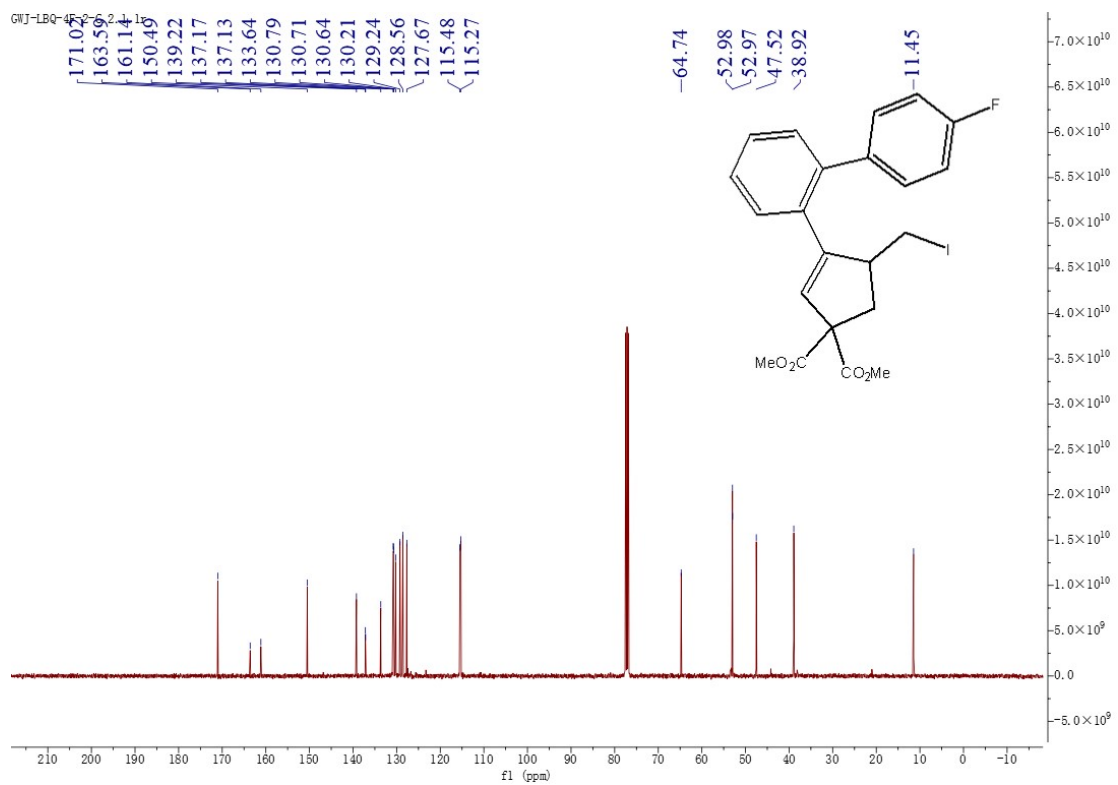

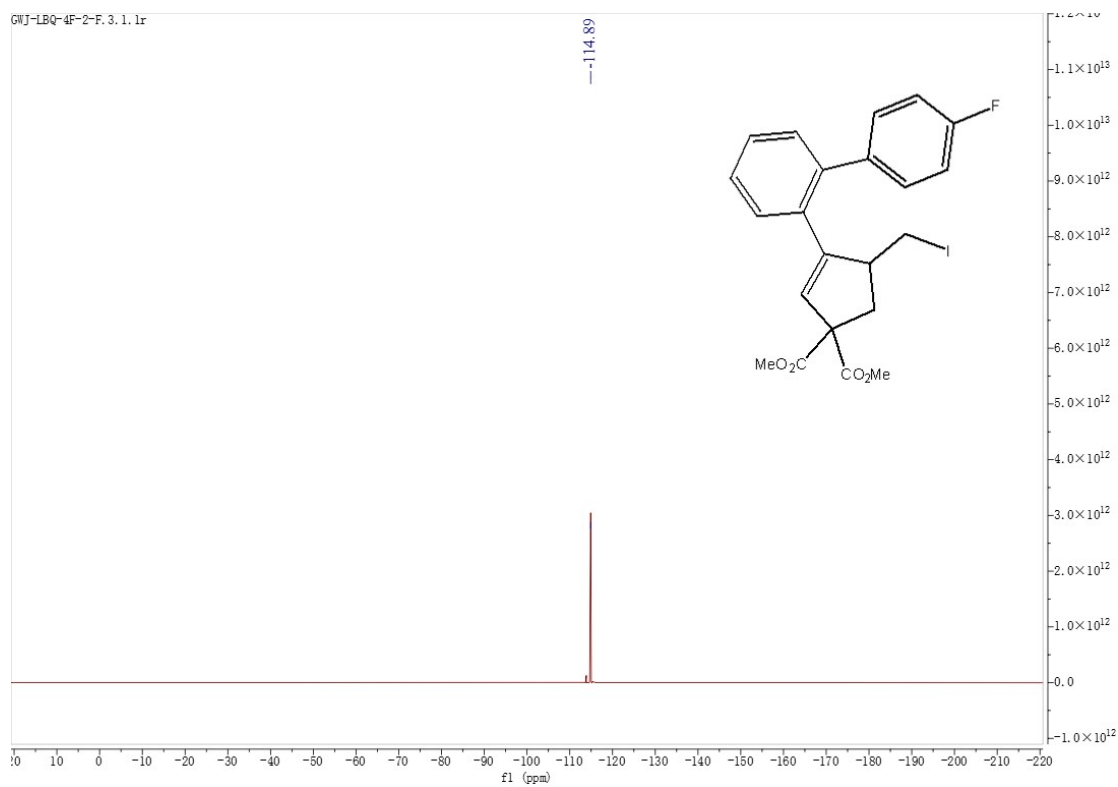

### Benzophenone (3'):

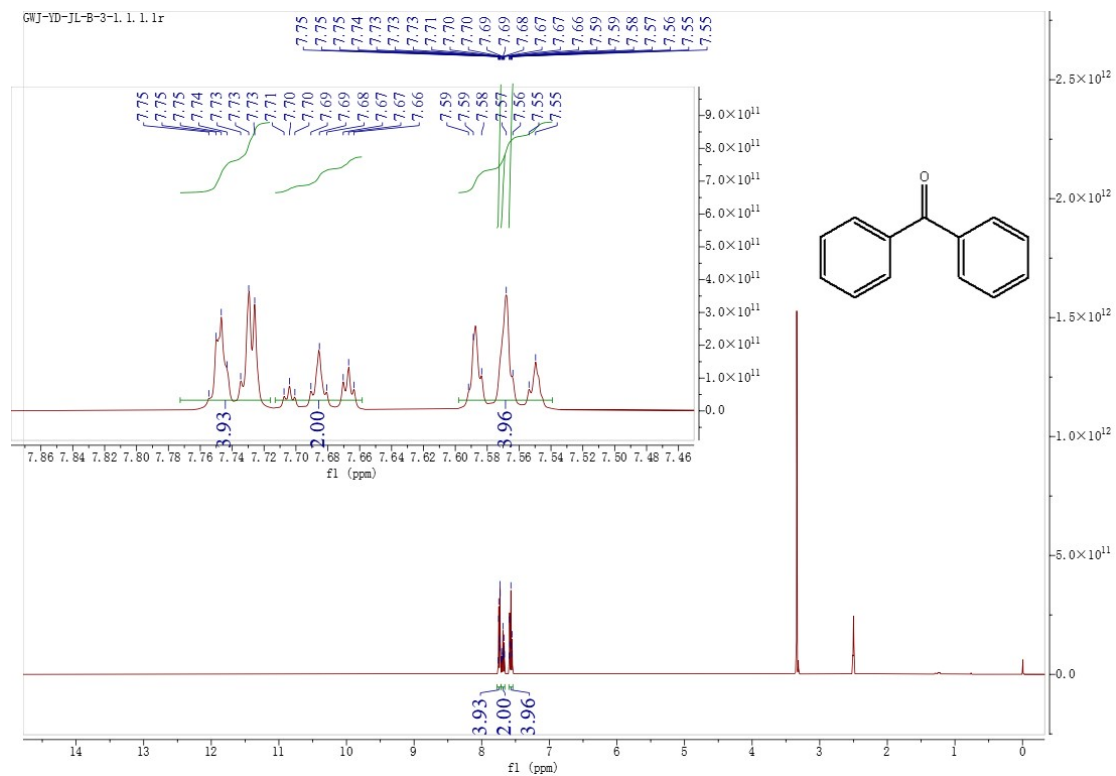

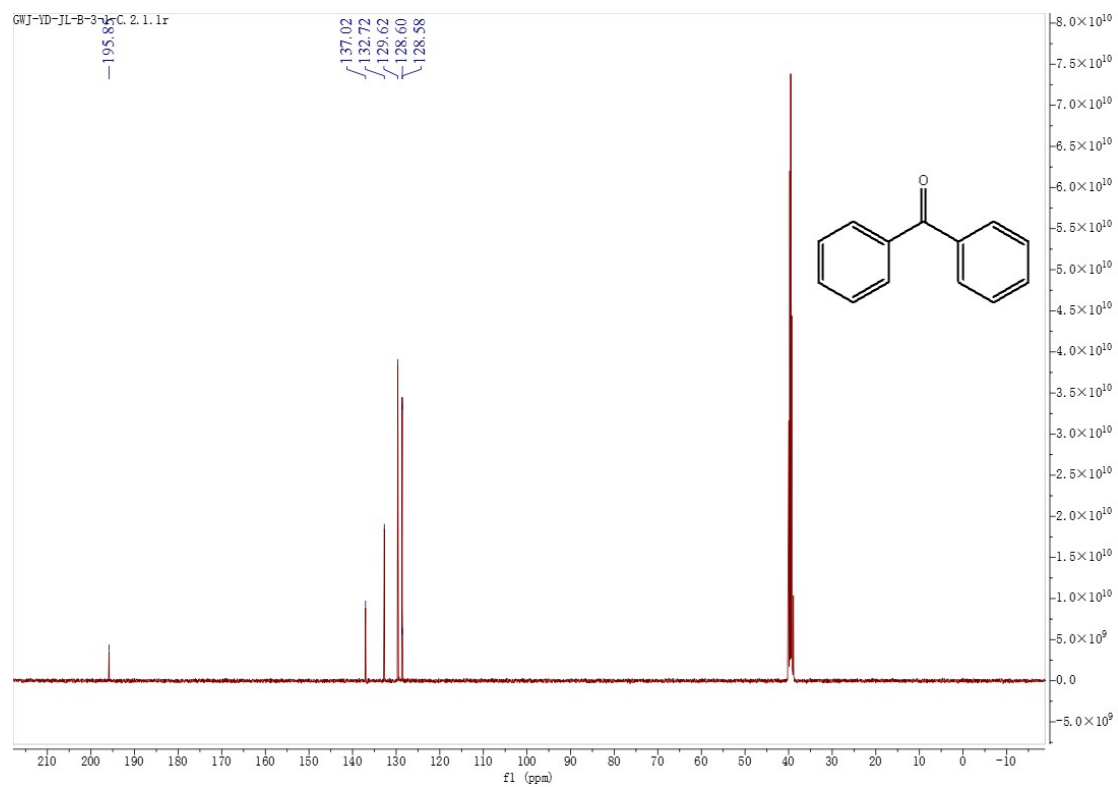

Supplement: d4qo01729c1.pdf [file d4qo01729c1.pdf]
